# Supplementary material
Source: publisher figshare collection journal article supplement (https://gsajournals.figshare.com/ndownloader/files/15090278)
Supplement: Supplementary file 1 [file 15090278]

## Sheet: Sheet1
File S10. List of up and downregulated genes in ve-1 mutant under standard and iron starvation conditions
Log2Fold Expression Change			Gene Ontology Terms			Functional Domains
GENE_ID	WT vs VE1 Standard	WT vs VE1 Fe Free	Biological Process	Cellular Component	Molecular Function	Pfam
NCU05126	-9.78995	-9.91377	-	integral component of membrane (GO:0016021)	transferase activity, transferring alkyl or aryl (other than methyl) groups (GO:0016765)	UbiA prenyltransferase family (PF01040)		Upregulated
NCU00732	0	-9.70951	oxidation-reduction process (GO:0055114)	-	heme binding (GO:0020037); iron ion binding (GO:0005506); oxidoreductase activity, acting on paired donors, with incorporation or reduction of molecular oxygen (GO:0016705)	Cytochrome P450 (PF00067)		No Change
NCU10865	0	-8.69542	metabolic process (GO:0008152)	-	oxidoreductase activity (GO:0016491)	Common central domain of tyrosinase (PF00264)		Downregulated
NCU04205	-2.70831	-8.25615	proteolysis (GO:0006508)	-	aspartic-type endopeptidase activity (GO:0004190)	Peptidase A4 family (PF01828)
NCU07033	-6.3547	-8.16053	-	-	-	LysM domain (PF01476)
NCU04931	-4.96789	-8.06662	-	-	-	-
NCU07034	-3.33983	-7.79331	-	-	-	LysM domain (PF01476)
NCU08223	-3.97606	-7.71656	-	-	-	-
NCU02919	0	-7.52288	-	-	-	Cupin domain (PF07883)
NCU02369	-2.70282	-7.32129	carbohydrate metabolic process (GO:0005975)	-	polygalacturonase activity (GO:0004650)	Glycosyl hydrolases family 28 (PF00295)
NCU04928	-3.86484	-7.26103	mycotoxin biosynthetic process (GO:0043386)	-	-	Domain of unknown function (DUF3328) (PF11807)
NCU03121	-2.70807	-7.06125	-	-	ATP binding (GO:0005524)	ATPase family associated with various cellular activities (AAA) (PF00004)
NCU09356	-5.40889	-6.6406	-	-	-	-
NCU09904	-6.14522	-6.63171	carbohydrate metabolic process (GO:0005975)	-	hydrolase activity, hydrolyzing O-glycosyl compounds (GO:0004553)	Glycosyl hydrolases family 16 (PF00722)
NCU11291	-5.46992	-6.60187	-	-	-	Domain of unknown function (DUF1993) (PF09351)
NCU16445	0	-6.57578	-	-	-	-
NCU05567	-9.63672	-6.54553	-	-	-	-
NCU09428	-4.77927	-6.52541	-	-	-	-
NCU08643	-5.68306	-6.47597	-	-	metal ion binding (GO:0046872); hydrolase activity (GO:0016787); acid phosphatase activity (GO:0003993)	Iron/zinc purple acid phosphatase-like protein C (PF14008); Calcineurin-like phosphoesterase (PF00149); Purple acid Phosphatase, N-terminal domain (PF16656)
NCU10539	-3.12576	-6.41406	-	-	-	-
NCU05188	-2.10206	-6.37575	-	-	FAD binding (GO:0071949)	Phenol hydroxylase, C-terminal dimerisation domain (PF07976); FAD binding domain (PF01494)
NCU08747	-5.59182	-6.34614	-	-	-	NAD(P)-binding Rossmann-like domain (PF13450)
NCU05855	-3.79746	-6.32295	-	-	O-methyltransferase activity (GO:0008171)	O-methyltransferase (PF00891)
NCU05189	-6.38974	-6.23501	-	-	-	-
NCU06912	-7.30519	-6.19683	-	-	-	-
NCU05852	0	-6.03377	-	-	-	Polysaccharide lyase (PF14099)
NCU05788	0	-6.03113	-	-	-	-
NCU08541	-4.51759	-5.88707	-	-	-	-
NCU07053	-5.74873	-5.87972	metabolic process (GO:0008152); oxidation-reduction process (GO:0055114)	-	oxidoreductase activity (GO:0016491)	Aldehyde dehydrogenase family (PF00171)
NCU09906	-3.37833	-5.86434	-	-	-	Glycosyl transferase family group 2 (PF13632)
NCU03494	-3.39804	-5.85225	-	-	-	Heterokaryon incompatibility protein (HET) (PF06985)
NCU06327	-6.97037	-5.79189	oxidation-reduction process (GO:0055114)	-	heme binding (GO:0020037); iron ion binding (GO:0005506); oxidoreductase activity, acting on paired donors, with incorporation or reduction of molecular oxygen (GO:0016705)	Cytochrome P450 (PF00067)
NCU09857	-4.82342	-5.71418	-	-	-	-
NCU10040	-2.16448	-5.69708	-	-	-	-
NCU02920	0	-5.69588	-	-	-	Enoyl-(Acyl carrier protein) reductase (PF13561)
NCU17050	-2.41213	-5.60691	-	-	-	-
NCU05909	-4.5493	-5.60277	-	-	-	Zinc finger, C2H2 type (PF00096)
NCU06589	-3.05043	-5.52538	-	-	-	-
NCU04533	0	-5.4991	cell-cell adhesion (GO:0098609)	membrane (GO:0016020)	-	Beta/Gamma crystallin (PF08964); Membrane binding (PF14564)
NCU09357	-4.60712	-5.49618	-	-	ATP binding (GO:0005524)	AAA domain (PF13086); AAA domain (PF13087); ATPase family associated with various cellular activities (AAA) (PF00004)
NCU09278	-4.26327	-5.46742	-	-	-	short chain dehydrogenase (PF00106)
NCU05183	-3.27286	-5.43841	-	-	-	Glycosyl hydrolase catalytic core (PF11790)
NCU01092	-6.83035	-5.27074	-	-	-	Enoyl-(Acyl carrier protein) reductase (PF13561)
NCU08655	-4.63364	-5.23501	-	-	-	-
NCU08224	-3.12809	-5.22844	-	-	-	-
NCU07736	-6.53984	-5.18929	transport (GO:0006810)	-	-	Fungal trichothecene efflux pump (TRI12) (PF06609)
NCU08232	-4.5726	-5.1197	-	-	-	Glycosyltransferase sugar-binding region containing DXD motif (PF04488)
NCU01957	0	-5.08565	-	-	-	-
NCU05122	0	-5.06808	-	-	-	-
NCU12022	-1.86253	-5.05864	-	membrane (GO:0016020)	-	Membrane-associating domain (PF01284)
NCU07532	-3.16867	-5.05706	-	-	-	-
NCU10572	-4.2148	-5.04325	-	-	-	short chain dehydrogenase (PF00106)
NCU00988	-3.31612	-4.9963	transmembrane transport (GO:0055085)	integral component of membrane (GO:0016021)	transmembrane transporter activity (GO:0022857)	Sugar (and other) transporter (PF00083)
NCU09171	0	-4.97552	-	-	-	Kelch motif (PF13854)
NCU06294	-2.22132	-4.9198	-	-	-	Protein of unknown function (DUF3645) (PF12359); Protein of unknown function (DUF3638) (PF12340)
NCU07192	-3.327	-4.90855	-	-	-	-
NCU00363	0	-4.83911	-	-	-	Kelch motif (PF13854)
NCU04910	-2.94302	-4.83451	-	-	-	Methyltransferase domain (PF13489)
NCU02918	-2.63758	-4.82985	oxidation-reduction process (GO:0055114)	-	-	Ketoacyl-synthetase C-terminal extension (PF16197); Zinc-binding dehydrogenase (PF13602); Polyketide synthase dehydratase (PF14765); KR domain (PF08659); Beta-ketoacyl synthase, C-terminal domain (PF02801); Beta-ketoacyl synthase, N-terminal domain (PF00109); Acyl transferase domain (PF00698); Alcohol dehydrogenase GroES-like domain (PF08240); Phosphopantetheine attachment site (PF00550)
NCU09702	-6.84521	-4.78271	-	-	-	O-Glycosyl hydrolase family 30 (PF14587)
NCU09506	-5.75187	-4.73384	-	-	-	-
NCU05964	-7.0906	-4.71888	-	-	-	Velvet factor (PF11754)
NCU06328	-6.03481	-4.70178	-	-	-	-
NCU06583	-4.4503	-4.69573	protein phosphorylation (GO:0006468)	-	ATP binding (GO:0005524); protein kinase activity (GO:0004672)	Protein kinase domain (PF00069); Heterokaryon incompatibility protein (HET) (PF06985)
NCU01209	-3.16076	-4.63302	regulation of transcription, DNA-templated (GO:0006355)	nucleus (GO:0005634)	zinc ion binding (GO:0008270); RNA polymerase II transcription factor activity, sequence-specific DNA binding (GO:0000981)	Fungal Zn(2)-Cys(6) binuclear cluster domain (PF00172)
NCU09267	-3.03041	-4.59298	-	-	-	Domain of unknown function (DUF1929) (PF09118); WSC domain (PF01822); Glyoxal oxidase N-terminus (PF07250)
NCU16942	-2.91927	-4.57119	-	-	-	Animal haem peroxidase (PF03098)
NCU10285	0	-4.56964	oxidation-reduction process (GO:0055114)	-	heme binding (GO:0020037); iron ion binding (GO:0005506); oxidoreductase activity, acting on paired donors, with incorporation or reduction of molecular oxygen (GO:0016705)	Cytochrome P450 (PF00067)
NCU10039	-3.98537	-4.55509	-	-	protein binding (GO:0005515)	SET domain (PF00856)
NCU08793	-4.27665	-4.5228	-	-	-	-
NCU04395	-2.99909	-4.52152	-	-	-	Glycosyl hydrolase family 30 TIM-barrel domain (PF02055)
NCU01056	-3.40511	-4.5013	-	-	-	-
NCU07138	-2.54913	-4.46788	-	-	-	-
NCU08447	-2.47886	-4.43165	-	-	-	-
NCU08147	-1.86144	-4.43089	-	-	-	Cation transporting ATPase, C-terminus (PF00689); haloacid dehalogenase-like hydrolase (PF00702); Cation transporter/ATPase, N-terminus (PF00690); E1-E2 ATPase (PF00122)
NCU03863	-2.7044	-4.41042	response to stress (GO:0006950)	integral component of membrane (GO:0016021)	-	RTA1 like protein (PF04479)
NCU05629	-1.43583	-4.39503	-	-	-	-
NCU11172	-3.09408	-4.37745	-	-	-	-
NCU02921	0	-4.35048	-	-	-	-
NCU05835	-2.84792	-4.34964	-	-	-	-
NCU06861	-4.37331	-4.33583	carbohydrate metabolic process (GO:0005975)	-	hydrolase activity, hydrolyzing O-glycosyl compounds (GO:0004553)	Glycosyl hydrolases family 43 (PF04616)
NCU12026	-2.80504	-4.29051	metabolic process (GO:0008152)	-	catalytic activity (GO:0003824)	AMP-binding enzyme (PF00501)
NCU12021	-1.54561	-4.29002	-	-	-	-
NCU01061	0	-4.26864	-	-	hydrolase activity (GO:0016787)	Dienelactone hydrolase family (PF01738)
NCU10883	-4.08342	-4.26036	-	-	-	-
NCU07802	-4.05184	-4.24497	-	-	-	-
NCU09856	-6.27324	-4.23886	-	-	ATP binding (GO:0005524)	ATPase family associated with various cellular activities (AAA) (PF00004)
NCU08013	-3.32394	-4.22963	-	-	-	-
NCU11383	-3.70536	-4.21249	-	-	-	Heterokaryon incompatibility protein (HET) (PF06985)
NCU12068	-4.08441	-4.1739	-	-	-	-
NCU05712	-4.94587	-4.1716	-	-	-	-
NCU01292	0	-4.1701	-	-	-	SnoaL-like domain (PF13577)
NCU05649	-3.90257	-4.16563	response to stress (GO:0006950)	integral component of membrane (GO:0016021)	-	RTA1 like protein (PF04479)
NCU09698	-1.94658	-4.16044	transmembrane transport (GO:0055085)	integral component of membrane (GO:0016021)	-	Major Facilitator Superfamily (PF07690)
NCU09639	-2.53897	-4.1565	-	-	-	Alcohol acetyltransferase (PF07247)
NCU02913	-4.10748	-4.14934	-	-	ATP binding (GO:0005524)	Helicase conserved C-terminal domain (PF00271); SNF2 family N-terminal domain (PF00176)
NCU05870	-4.15395	-4.14585	-	-	-	OTT_1508-like deaminase (PF14441)
NCU05149	-3.81391	-4.12348	-	-	-	-
NCU07737	-4.54585	-4.09563	-	-	FAD binding (GO:0071949)	FAD binding domain (PF00890); FAD binding domain (PF01494)
NCU08179	-3.30152	-4.03726	-	-	-	Glycosyl hydrolase family 79 C-terminal beta domain (PF16862)
NCU16472	-3.49058	-4.03034	-	-	-	NACHT domain (PF05729)
NCU05209	0	-4.02932	response to stress (GO:0006950)	integral component of membrane (GO:0016021)	-	RTA1 like protein (PF04479)
NCU09976	-2.86553	-4.02186	-	-	-	GDSL-like Lipase/Acylhydrolase family (PF13472)
NCU09511	-2.481	-4.02144	-	-	-	Mitochondrial ATPase expression (PF12921)
NCU01382	-2.07754	-4.02078	-	-	-	Protein of unknown function (DUF3433) (PF11915)
NCU05185	-3.63038	-3.98948	oxidation-reduction process (GO:0055114)	-	heme binding (GO:0020037); iron ion binding (GO:0005506); FMN binding (GO:0010181); oxidoreductase activity, acting on paired donors, with incorporation or reduction of molecular oxygen (GO:0016705); oxidoreductase activity (GO:0016491)	Cytochrome P450 (PF00067); FAD binding domain (PF00667); Oxidoreductase NAD-binding domain (PF00175); Flavodoxin (PF00258)
NCU05598	-3.36521	-3.97014	carbohydrate metabolic process (GO:0005975)	-	carbohydrate binding (GO:0030246); carbon-oxygen lyase activity, acting on polysaccharides (GO:0016837)	Polysaccharide lyase family 4, domain II (PF14686); Polysaccharide lyase family 4, domain III (PF14683); Rhamnogalacturonan lyase B, N-terminal (PF09284)
NCU00855	-3.18911	-3.9681	-	-	-	-
NCU12067	0	-3.94569	-	-	-	-
NCU12051	-3.85577	-3.94556	-	-	-	-
NCU09775	-7.35088	-3.90308	arabinan metabolic process (GO:0031221)	-	alpha-L-arabinofuranosidase activity (GO:0046556)	Alpha-L-arabinofuranosidase B, catalytic (PF09206)
NCU16473	0	-3.89812	-	-	-	-
NCU07798	-3.2438	-3.89415	-	-	-	-
NCU06427	-3.17499	-3.85794	-	-	-	-
NCU04436	0	-3.82567	-	-	-	-
NCU06965	-2.42883	-3.81227	-	-	-	Ankyrin repeats (3 copies) (PF12796)
NCU00845	-2.36917	-3.79266	-	-	-	Domain of unknown function (DUF1917) (PF08939)
NCU16673	-2.47382	-3.79035	-	-	-	-
NCU09245	-3.30537	-3.76844	lipid metabolic process (GO:0006629)	-	-	Patatin-like phospholipase (PF01734)
NCU00984	-1.79825	-3.74185	-	-	-	von Willebrand factor type A domain (PF13768); Vault protein inter-alpha-trypsin domain (PF08487)
NCU06326	-5.64549	-3.71872	-	-	-	Pectate lyase (PF00544)
NCU06140	0	-3.7086	-	-	-	Myb-like DNA-binding domain (PF13921)
NCU08333	-2.7802	-3.70728	proteolysis (GO:0006508)	-	cysteine-type endopeptidase activity (GO:0004197)	Peptidase C1-like family (PF03051)
NCU06443	-2.32534	-3.70557	regulation of transcription, DNA-templated (GO:0006355)	nucleus (GO:0005634)	zinc ion binding (GO:0008270); RNA polymerase II transcription factor activity, sequence-specific DNA binding (GO:0000981)	Fungal Zn(2)-Cys(6) binuclear cluster domain (PF00172)
NCU08433	-2.45323	-3.6979	-	-	-	-
NCU09024	-4.51765	-3.67305	oxidation-reduction process (GO:0055114)	-	flavin adenine dinucleotide binding (GO:0050660); oxidoreductase activity, acting on CH-OH group of donors (GO:0016614)	GMC oxidoreductase (PF05199); GMC oxidoreductase (PF00732)
NCU05137	-3.67381	-3.66939	-	-	-	-
NCU07767	-1.69618	-3.65661	-	-	ADP binding (GO:0043531)	NB-ARC domain (PF00931)
NCU05834	0	-3.65102	-	-	-	-
NCU01873	0	-3.63963	-	-	-	Cytochrome domain of cellobiose dehydrogenase (PF16010)
NCU07804	-3.1799	-3.6371	-	-	-	-
NCU04435	1.8558	-3.63	transport (GO:0006810); transmembrane transport (GO:0055085)	membrane (GO:0016020)	-	Amino acid permease (PF00324)
NCU05495	-3.4998	-3.61531	-	-	-	CVNH domain (PF08881)
NCU07335	-4.02304	-3.59703	-	-	-	Heterokaryon incompatibility protein (HET) (PF06985)
NCU06747	-2.65493	-3.59173	-	-	-	-
NCU00774	-3.96577	-3.5883	-	-	-	-
NCU15830	-1.77569	-3.58675	-	-	-	-
NCU07129	-5.35247	-3.58014	transport (GO:0006810); transmembrane transport (GO:0055085)	membrane (GO:0016020)	-	Amino acid permease (PF00324)
NCU07124	0	-3.57614	-	-	-	-
NCU07768	0	-3.56988	-	-	-	short chain dehydrogenase (PF00106)
NCU04930	-2.15346	-3.56671	-	-	-	Carboxylesterase family (PF00135)
NCU02584	0	-3.56052	-	-	-	-
NCU09761	-4.44791	-3.55893	-	-	-	-
NCU00240	-1.85908	-3.55774	-	-	-	Amidase (PF01425)
NCU02344	0	-3.55347	-	-	-	Glycosyl hydrolase family 61 (PF03443)
NCU12050	-4.13862	-3.53748	-	-	-	Ankyrin repeats (3 copies) (PF12796)
NCU11305	0	-3.5214	-	-	-	Putative serine esterase (DUF676) (PF05057)
NCU05256	-2.73274	-3.51391	-	-	-	-
NCU05131	-2.31921	-3.50833	-	-	-	-
NCU07353	-4.96777	-3.50219	-	-	-	-
NCU09635	0	-3.48755	oxidation-reduction process (GO:0055114)	-	oxidoreductase activity (GO:0016491); flavin adenine dinucleotide binding (GO:0050660)	Berberine and berberine like (PF08031); FAD binding domain (PF01565)
NCU09937	-3.32307	-3.48506	-	-	-	Glycosyl hydrolase family 76 (PF03663)
NCU11340	0	-3.48273	-	-	-	-
NCU03776	-3.64879	-3.47718	transport (GO:0006810); transmembrane transport (GO:0055085)	integral component of membrane (GO:0016021)	ATPase activity, coupled to transmembrane movement of substances (GO:0042626); ATPase activity (GO:0016887); ATP binding (GO:0005524)	ABC transporter (PF00005); ABC transporter transmembrane region (PF00664)
NCU02363	-2.79618	-3.47434	response to stress (GO:0006950)	integral component of membrane (GO:0016021)	-	RTA1 like protein (PF04479)
NCU08721	-3.87083	-3.47275	-	-	-	Heterokaryon incompatibility protein (HET) (PF06985)
NCU09651	0	-3.46115	-	-	-	Kelch motif (PF13854)
NCU08856	0	-3.44675	inositol catabolic process (GO:0019310); oxidation-reduction process (GO:0055114)	cytoplasm (GO:0005737)	inositol oxygenase activity (GO:0050113); iron ion binding (GO:0005506)	Myo-inositol oxygenase (PF05153)
NCU09197	-2.00153	-3.4385	-	-	-	Myb-like DNA-binding domain (PF00249); Myb-like DNA-binding domain (PF13921)
NCU07311	0	-3.42626	-	-	-	-
NCU00832	-2.5671	-3.41914	-	-	-	-
NCU09636	0	-3.40668	oxidation-reduction process (GO:0055114)	-	heme binding (GO:0020037); iron ion binding (GO:0005506); oxidoreductase activity, acting on paired donors, with incorporation or reduction of molecular oxygen (GO:0016705)	Cytochrome P450 (PF00067)
NCU04034	-3.25589	-3.40668	-	membrane (GO:0016020)	-	Membrane-associating domain (PF01284)
NCU03600	-3.07029	-3.40281	-	-	-	-
NCU08750	-3.48049	-3.40173	oxidation-reduction process (GO:0055114)	-	oxidoreductase activity (GO:0016491); flavin adenine dinucleotide binding (GO:0050660)	Berberine and berberine like (PF08031); FAD binding domain (PF01565)
NCU01297	-4.3603	-3.39262	-	-	-	-
NCU02086	-2.06753	-3.38856	-	-	-	-
NCU08820	-2.96722	-3.37507	-	-	-	-
NCU06911	-3.16674	-3.37464	-	-	-	-
NCU06153	0	-3.35797	oxidation-reduction process (GO:0055114)	-	flavin adenine dinucleotide binding (GO:0050660); NADP binding (GO:0050661); N,N-dimethylaniline monooxygenase activity (GO:0004499)	Flavin-binding monooxygenase-like (PF00743)
NCU07121	-3.09869	-3.35514	-	-	-	-
NCU04049	-2.78845	-3.35421	-	-	-	-
NCU04996	0	-3.33619	-	-	N-acetyltransferase activity (GO:0008080)	Acetyltransferase (GNAT) domain (PF13302)
NCU05153	-2.3692	-3.3269	-	-	-	Bacterial transferase hexapeptide (six repeats) (PF00132)
NCU00938	-2.87771	-3.3173	-	-	-	-
NCU02653	0	-3.30579	transmembrane transport (GO:0055085)	integral component of membrane (GO:0016021)	-	Major Facilitator Superfamily (PF07690)
NCU05693	-2.79912	-3.30031	-	-	GTP binding (GO:0005525)	Dynamin central region (PF01031); Dynamin family (PF00350)
NCU08705	-1.67443	-3.29188	-	-	-	NACHT domain (PF05729); Prion-inhibition and propagation (PF14479)
NCU04532	0	-3.2872	-	-	hydrolase activity (GO:0016787)	Calcineurin-like phosphoesterase (PF00149)
NCU07582	-1.85963	-3.27522	-	-	-	-
NCU02194	-2.29801	-3.27432	-	-	-	NACHT domain (PF05729); Fungal N-terminal domain of STAND proteins (PF17111)
NCU05311	-2.43425	-3.25504	-	-	-	-
NCU07405	-1.29686	-3.24705	-	-	-	-
NCU07257	0	-3.24598	-	-	protein binding (GO:0005515)	F-box-like (PF12937)
NCU05501	-3.88027	-3.24016	-	-	-	Methyltransferase domain (PF13489)
NCU02703	-1.63448	-3.23986	-	-	-	-
NCU10687	-3.07179	-3.22699	-	-	-	-
NCU01353	-3.55083	-3.21813	carbohydrate metabolic process (GO:0005975)	-	hydrolase activity, hydrolyzing O-glycosyl compounds (GO:0004553)	Glycosyl hydrolases family 16 (PF00722)
NCU05832	-3.67488	-3.21504	-	-	-	Methyltransferase domain (PF13489)
NCU09099	0	-3.18495	-	-	-	-
NCU05089	0	-3.18234	transmembrane transport (GO:0055085)	integral component of membrane (GO:0016021)	-	Major Facilitator Superfamily (PF07690)
NCU03533	-3.3976	-3.1731	-	-	-	Heterokaryon incompatibility protein (HET) (PF06985)
NCU01076	-3.1206	-3.17148	-	-	-	-
NCU01077	0	-3.17079	-	-	-	-
NCU06824	-3.25713	-3.16683	-	-	-	-
NCU04487	-5.58383	-3.15036	-	-	-	-
NCU07255	-2.49135	-3.13355	-	-	-	Protein of unknown function (DUF4238) (PF14022)
NCU09990	-4.45116	-3.13198	-	-	-	-
NCU04997	0	-3.1058	carbohydrate metabolic process (GO:0005975)	extracellular region (GO:0005576)	hydrolase activity, hydrolyzing O-glycosyl compounds (GO:0004553); cellulose binding (GO:0030248)	Fungal cellulose binding domain (PF00734); Glycosyl hydrolase family 10 (PF00331)
NCU16320	0	-3.09981	-	-	-	-
NCU04122	-2.80982	-3.09851	-	-	-	Protein of unknown function (DUF2990) (PF11693); Protein of unknown function (DUF3455) (PF11937)
NCU09244	-1.79221	-3.08241	lipid metabolic process (GO:0006629)	-	ADP binding (GO:0043531)	Patatin-like phospholipase (PF01734); NB-ARC domain (PF00931)
NCU09508	0	-3.08123	carbohydrate metabolic process (GO:0005975)	-	hydrolase activity, acting on carbon-nitrogen (but not peptide) bonds (GO:0016810)	Polysaccharide deacetylase (PF01522)
NCU01697	-3.17376	-3.0806	-	-	-	-
NCU00881	-2.18048	-3.08004	-	-	-	-
NCU05138	-2.11384	-3.07914	-	-	-	Glycosyltransferase family 25 (LPS biosynthesis protein) (PF01755)
NCU07073	-2.0969	-3.07758	-	-	-	Prion-inhibition and propagation (PF14479)
NCU04907	-2.54402	-3.06491	-	-	-	Methyltransferase domain (PF13489)
NCU05915	-1.869	-3.06475	-	-	-	-
NCU02175	-3.16154	-3.06062	lipid metabolic process (GO:0006629); signal transduction (GO:0007165); intracellular signal transduction (GO:0035556)	-	phosphatidylinositol phospholipase C activity (GO:0004435)	Phosphatidylinositol-specific phospholipase C, Y domain (PF00387); Phosphatidylinositol-specific phospholipase C, X domain (PF00388)
NCU00304	-3.292	-3.0564	-	-	-	Methyltransferase domain (PF13489)
NCU09712	-1.88778	-3.05506	-	-	-	-
NCU02910	-2.79394	-3.04575	-	-	-	-
NCU08330	-1.44221	-3.03831	-	-	-	DJ-1/PfpI family (PF01965)
NCU09031	-3.6093	-3.0326	-	-	-	-
NCU03132	-2.56009	-3.03097	-	-	-	-
NCU10852	0	-3.02709	carbohydrate metabolic process (GO:0005975)	-	hydrolase activity, hydrolyzing O-glycosyl compounds (GO:0004553)	Glycosyl hydrolase family 20, catalytic domain (PF00728); beta-acetyl hexosaminidase like (PF14845)
NCU02811	-2.13645	-3.02527	-	-	-	-
NCU09193	-1.85821	-3.01772	-	-	-	-
NCU05780	-1.31817	-3.01548	-	-	protein binding (GO:0005515)	Glutathione S-transferase, C-terminal domain (PF00043); Glutathione S-transferase, N-terminal domain (PF02798)
NCU02190	0	-3.01493	-	-	-	Oxysterol-binding protein (PF01237)
NCU02909	-2.06475	-3.00699	-	-	-	Fungal chitosanase of glycosyl hydrolase group 75 (PF07335)
NCU09337	-1.71149	-2.99498	-	-	-	-
NCU11292	-4.42345	-2.99492	-	-	-	-
NCU02193	-2.44942	-2.99272	-	-	thiamine pyrophosphate binding (GO:0030976); catalytic activity (GO:0003824); magnesium ion binding (GO:0000287)	Thiamine pyrophosphate enzyme, C-terminal TPP binding domain (PF02775); Thiamine pyrophosphate enzyme, central domain (PF00205); Thiamine pyrophosphate enzyme, N-terminal TPP binding domain (PF02776)
NCU05081	-4.10631	-2.98984	-	-	-	-
NCU16807	-2.48711	-2.98866	-	integral component of membrane (GO:0016021)	-	Interferon-induced 6-16 family (PF06140)
NCU08231	-3.03147	-2.98784	-	-	transferase activity, transferring acyl groups other than amino-acyl groups (GO:0016747)	Acyltransferase family (PF01757)
NCU00017	-3.54096	-2.984	regulation of transcription, DNA-templated (GO:0006355)	nucleus (GO:0005634)	zinc ion binding (GO:0008270); RNA polymerase II transcription factor activity, sequence-specific DNA binding (GO:0000981)	Fungal Zn(2)-Cys(6) binuclear cluster domain (PF00172)
NCU07511	-3.2765	-2.9794	-	-	-	Heterokaryon incompatibility protein (HET) (PF06985)
NCU02526	-2.4636	-2.97342	-	-	-	-
NCU00585	0	-2.95562	biosynthetic process (GO:0009058)	-	transferase activity (GO:0016740)	Squalene/phytoene synthase (PF00494)
NCU05160	-2.59967	-2.93706	-	-	ATP binding (GO:0005524)	ATPase family associated with various cellular activities (AAA) (PF00004)
NCU04025	-3.25569	-2.92619	-	-	-	-
NCU17167	0	-2.92564	-	-	-	-
NCU03378	-1.53467	-2.92527	-	-	-	-
NCU16997	0	-2.9189	-	-	-	-
NCU07107	0	-2.91239	-	-	-	Methyltransferase domain (PF13489)
NCU06416	-3.83672	-2.90762	oxidation-reduction process (GO:0055114)	-	oxidoreductase activity (GO:0016491)	2OG-Fe(II) oxygenase superfamily (PF03171); non-haem dioxygenase in morphine synthesis N-terminal (PF14226)
NCU17135	0	-2.90713	-	-	-	-
NCU04046	-2.69903	-2.90456	-	-	-	-
NCU07392	-2.61393	-2.88815	regulation of transcription, DNA-templated (GO:0006355)	nucleus (GO:0005634)	zinc ion binding (GO:0008270); RNA polymerase II transcription factor activity, sequence-specific DNA binding (GO:0000981)	Fungal specific transcription factor domain (PF11951); Fungal Zn(2)-Cys(6) binuclear cluster domain (PF00172)
NCU06419	-1.19582	-2.88797	protein phosphorylation (GO:0006468)	-	ATP binding (GO:0005524); protein kinase activity (GO:0004672)	Protein kinase domain (PF00069)
NCU00175	-7.20097	-2.88495	-	-	-	-
NCU05841	-4.22192	-2.88278	-	-	-	Methyltransferase domain (PF13489)
NCU00869	-1.7966	-2.87466	-	-	-	-
NCU03333	-1.78958	-2.87437	-	-	-	Tyrosine phosphatase family (PF03162)
NCU07546	0	-2.8724	transport (GO:0006810); transmembrane transport (GO:0055085)	integral component of membrane (GO:0016021)	ATPase activity, coupled to transmembrane movement of substances (GO:0042626); ATPase activity (GO:0016887); ATP binding (GO:0005524)	ABC transporter (PF00005); ABC transporter transmembrane region (PF00664)
NCU03323	-3.20401	-2.87187	-	-	-	-
NCU09307	-2.11998	-2.87018	-	-	-	-
NCU06607	-2.23851	-2.86888	-	-	-	-
NCU02516	-2.73919	-2.86776	-	-	-	-
NCU08230	0	-2.85678	-	-	-	-
NCU08641	-2.64566	-2.85341	-	-	ATP binding (GO:0005524)	ATPase family associated with various cellular activities (AAA) (PF00004)
NCU04887	0	-2.84867	protein glycosylation (GO:0006486)	-	transferase activity, transferring glycosyl groups (GO:0016757)	Mannosyltransferase putative (PF11051)
NCU01298	0	-2.8433	-	-	-	-
NCU04491	-1.75293	-2.84291	-	-	-	-
NCU08052	0	-2.84005	transport (GO:0006810)	membrane (GO:0016020)	transporter activity (GO:0005215)	Major intrinsic protein (PF00230)
NCU04410	-1.56955	-2.83059	tRNA splicing, via endonucleolytic cleavage and ligation (GO:0006388)	-	ATP binding (GO:0005524); RNA ligase (ATP) activity (GO:0003972)	RNA ligase (PF09511); Fungal tRNA ligase phosphodiesterase domain (PF08302); tRNA ligase kinase domain (PF08303)
NCU01348	-2.58557	-2.82759	-	-	metal ion binding (GO:0046872)	Arginase family (PF00491)
NCU08229	0	-2.8179	-	-	-	-
NCU06582	0	-2.80529	protein phosphorylation (GO:0006468)	-	ATP binding (GO:0005524); protein kinase activity (GO:0004672)	Protein kinase domain (PF00069)
NCU02613	-1.67986	-2.80132	-	-	-	-
NCU07063	-1.34152	-2.79636	-	-	-	Eukaryotic aspartyl protease (PF00026)
NCU07022	0	-2.79566	oxidation-reduction process (GO:0055114)	-	-	Zinc-binding dehydrogenase (PF00107); Alcohol dehydrogenase GroES-like domain (PF08240)
NCU05728	0	-2.79278	-	-	-	-
NCU07036	-4.59197	-2.79265	nucleobase-containing compound metabolic process (GO:0006139)	-	3'-5' exonuclease activity (GO:0008408); nucleic acid binding (GO:0003676)	3'-5' exonuclease (PF01612)
NCU09823	-2.88627	-2.79046	-	-	-	-
NCU09023	-1.88653	-2.78799	oxidation-reduction process (GO:0055114)	-	oxidoreductase activity (GO:0016491); copper ion binding (GO:0005507)	Multicopper oxidase (PF00394); Multicopper oxidase (PF07731); Multicopper oxidase (PF07732)
NCU07464	0	-2.78191	nucleoside metabolic process (GO:0009116)	-	catalytic activity (GO:0003824)	Phosphorylase superfamily (PF01048)
NCU09187	-2.67874	-2.77728	-	-	ATP binding (GO:0005524)	ATPase family associated with various cellular activities (AAA) (PF00004)
NCU04107	0	-2.77185	-	-	-	-
NCU07035	0	-2.77066	carbohydrate metabolic process (GO:0005975)	-	-	Glycosyl hydrolases family 18 (PF00704)
NCU06077	0	-2.76623	transmembrane transport (GO:0055085)	integral component of membrane (GO:0016021)	-	Major Facilitator Superfamily (PF07690)
NCU04556	0	-2.7661	-	-	-	-
NCU04502	-1.77474	-2.75575	-	-	-	-
NCU07581	0	-2.75183	-	-	-	-
NCU07008	-3.93288	-2.75023	oxidation-reduction process (GO:0055114)	-	oxidoreductase activity, acting on single donors with incorporation of molecular oxygen, incorporation of two atoms of oxygen (GO:0016702)	Retinal pigment epithelial membrane protein (PF03055)
NCU02903	-1.41388	-2.74513	-	-	-	-
NCU03293	-3.3508	-2.74321	-	-	-	-
NCU00321	-2.59211	-2.73433	-	-	-	-
NCU04451	0	-2.73141	-	-	-	-
NCU01065	-2.22373	-2.72224	ammonium transport (GO:0015696)	membrane (GO:0016020)	ammonium transmembrane transporter activity (GO:0008519)	Ammonium Transporter Family (PF00909)
NCU00911	-4.09714	-2.72056	-	-	-	Glycosyltransferase like family 2 (PF13641)
NCU04283	0	-2.71686	-	-	-	-
NCU00176	-3.63855	-2.71676	-	-	-	-
NCU10809	-2.08131	-2.71618	-	-	ATP binding (GO:0005524)	Helicase conserved C-terminal domain (PF00271); SNF2 family N-terminal domain (PF00176)
NCU05309	-1.75438	-2.70984	-	-	hydrolase activity, acting on ester bonds (GO:0016788)	TatD related DNase (PF01026)
NCU09693	-1.26249	-2.68374	-	-	-	-
NCU00233	0	-2.67078	carbohydrate metabolic process (GO:0005975)	-	hydrolase activity, hydrolyzing O-glycosyl compounds (GO:0004553)	Glycosyl hydrolases family 16 (PF00722)
NCU03960	-3.35827	-2.66722	-	-	-	-
NCU00781	0	-2.66329	-	-	-	-
NCU08716	0	-2.65483	oxidation-reduction process (GO:0055114)	-	heme binding (GO:0020037); iron ion binding (GO:0005506); oxidoreductase activity, acting on paired donors, with incorporation or reduction of molecular oxygen (GO:0016705)	Cytochrome P450 (PF00067)
NCU10965	0	-2.65189	-	-	-	-
NCU06884	-2.42503	-2.64594	-	-	-	-
NCU08839	0	-2.63741	-	-	-	SAP domain (PF02037)
NCU00868	-2.02935	-2.62981	-	-	-	-
NCU02051	-1.52601	-2.62108	transport (GO:0006810); transmembrane transport (GO:0055085)	integral component of membrane (GO:0016021)	ATPase activity, coupled to transmembrane movement of substances (GO:0042626); ATPase activity (GO:0016887); ATP binding (GO:0005524)	ABC transporter (PF00005); ABC transporter transmembrane region (PF00664)
NCU04416	1.06852	-2.6193	-	-	-	Clr5 domain (PF14420)
NCU05906	-2.54275	-2.61314	-	-	-	-
NCU07388	-1.58944	-2.61295	-	-	-	-
NCU09767	-2.11823	-2.61245	transmembrane transport (GO:0055085)	integral component of membrane (GO:0016021)	-	Major Facilitator Superfamily (PF07690)
NCU04314	-1.15763	-2.61093	-	-	-	-
NCU03725	-3.49091	-2.61082	-	-	DNA binding (GO:0003677)	NDT80 / PhoG like DNA-binding family (PF05224)
NCU05354	-1.73784	-2.60818	-	-	-	-
NCU00878	-1.47219	-2.60359	-	-	-	-
NCU02782	0	-2.60331	-	-	-	-
NCU04583	0	-2.59472	-	-	N-acetyltransferase activity (GO:0008080)	Acetyltransferase (GNAT) domain (PF13302)
NCU06254	0	-2.59393	tRNA splicing, via endonucleolytic cleavage and ligation (GO:0006388)	-	transferase activity, transferring phosphorus-containing groups (GO:0016772)	RNA 2'-phosphotransferase, Tpt1 / KptA family (PF01885)
NCU04472	-3.19385	-2.59272	-	-	ATP binding (GO:0005524); nucleic acid binding (GO:0003676)	Helicase conserved C-terminal domain (PF00271); DEAD/DEAH box helicase (PF00270)
NCU08397	-2.12065	-2.59264	transmembrane transport (GO:0055085)	-	-	OPT oligopeptide transporter protein (PF03169)
NCU09479	0	-2.5816	-	-	-	-
NCU08697	-1.98596	-2.58033	transmembrane transport (GO:0055085); metal ion transport (GO:0030001)	membrane (GO:0016020)	metal ion transmembrane transporter activity (GO:0046873)	CorA-like Mg2+ transporter protein (PF01544)
NCU01158	0	-2.57479	-	-	-	-
NCU01070	0	-2.57371	-	-	aminoacyl-tRNA hydrolase activity (GO:0004045)	Peptidyl-tRNA hydrolase (PF01195)
NCU01210	0	-2.56472	biosynthetic process (GO:0009058)	-	-	Anthranilate synthase component I, N terminal region (PF04715); chorismate binding enzyme (PF00425); Glutamine amidotransferase class-I (PF00117)
NCU02074	-1.30567	-2.56431	oxidation-reduction process (GO:0055114)	endoplasmic reticulum (GO:0005783)	oxidoreductase activity, acting on a sulfur group of donors, disulfide as acceptor (GO:0016671); protein disulfide isomerase activity (GO:0003756)	Endoplasmic Reticulum Oxidoreductin 1 (ERO1) (PF04137)
NCU12104	-1.83664	-2.56202	-	-	-	-
NCU02020	-2.0132	-2.5611	oxidation-reduction process (GO:0055114)	-	oxidoreductase activity (GO:0016491)	Ferric reductase NAD binding domain (PF08030); FAD-binding domain (PF08022); Ferric reductase like transmembrane component (PF01794)
NCU05136	-2.80579	-2.55578	-	-	-	Glycoside-hydrolase family GH114 (PF03537)
NCU02512	0	-2.55286	-	-	-	-
NCU02084	-2.12381	-2.5509	-	-	metal ion binding (GO:0046872)	Arginase family (PF00491)
NCU09650	-6.56094	-2.54842	-	-	-	-
NCU17137	-3.54635	-2.52701	-	-	-	-
NCU08816	-3.31529	-2.52207	-	-	-	Protein of unknown function (DUF3632) (PF12311)
NCU08495	-4.43458	-2.51777	-	-	-	-
NCU17278	-1.72599	-2.51018	-	-	-	Heterokaryon incompatibility protein (HET) (PF06985)
NCU10895	-3.58367	-2.50072	mismatch repair (GO:0006298)	-	mismatched DNA binding (GO:0030983); ATP binding (GO:0005524)	MutS domain V (PF00488); MutS domain III (PF05192)
NCU07905	-2.31932	-2.49784	-	-	-	-
NCU00399	-5.04779	-2.49347	-	-	-	-
NCU06860	-2.11118	-2.49193	transmembrane transport (GO:0055085)	integral component of membrane (GO:0016021)	-	Major Facilitator Superfamily (PF07690)
NCU05595	0	-2.48963	-	-	-	Cytochrome domain of cellobiose dehydrogenase (PF16010)
NCU05018	-1.63001	-2.48649	-	-	-	-
NCU04285	-3.86226	-2.48288	-	-	-	-
NCU04060	0	-2.4754	-	-	-	-
NCU03887	0	-2.47092	-	-	-	Arrestin (or S-antigen), C-terminal domain (PF02752); Arrestin (or S-antigen), N-terminal domain (PF00339)
NCU08358	-1.34808	-2.46833	transport (GO:0006810); transmembrane transport (GO:0055085)	integral component of membrane (GO:0016021)	ATPase activity, coupled to transmembrane movement of substances (GO:0042626); ATPase activity (GO:0016887); ATP binding (GO:0005524)	ABC transporter (PF00005); ABC transporter transmembrane region (PF00664)
NCU16905	0	-2.46302	-	-	-	-
NCU08280	-1.29788	-2.45646	oxidation-reduction process (GO:0055114)	integral component of membrane (GO:0016021)	flavin adenine dinucleotide binding (GO:0050660); oxidoreductase activity (GO:0016491); squalene monooxygenase activity (GO:0004506)	Squalene epoxidase (PF08491); FAD dependent oxidoreductase (PF01266)
NCU05123	-1.83783	-2.45384	-	-	-	Glycosyl transferase family 90 (PF05686)
NCU07840	-2.45983	-2.45097	-	-	-	Heterokaryon incompatibility protein (HET) (PF06985)
NCU06009	-3.69399	-2.44974	-	-	-	Aldo/keto reductase family (PF00248)
NCU09637	0	-2.44839	-	-	O-methyltransferase activity (GO:0008171)	O-methyltransferase (PF00891)
NCU02932	0	-2.4476	-	-	-	cAMP-regulated phosphoprotein/endosulfine conserved region (PF04667)
NCU03355	0	-2.44032	proteolysis (GO:0006508)	intracellular (GO:0005622)	calcium-dependent cysteine-type endopeptidase activity (GO:0004198)	Calpain family cysteine protease (PF00648)
NCU07853	-1.08541	-2.44002	-	-	-	Uricase (PF01014)
NCU10894	0	-2.43745	-	-	-	-
NCU02875	-4.05345	-2.43616	-	-	-	-
NCU00496	-3.05387	-2.4345	-	-	nucleic acid binding (GO:0003676)	RNA recognition motif. (a.k.a. RRM, RBD, or RNP domain) (PF00076)
NCU01509	-1.97001	-2.43388	-	-	-	-
NCU05341	0	-2.41321	-	-	-	Endonuclease/Exonuclease/phosphatase family (PF03372)
NCU10031	-4.05298	-2.40859	metabolic process (GO:0008152)	-	oxidoreductase activity (GO:0016491)	Common central domain of tyrosinase (PF00264)
NCU03022	-1.10825	-2.40247	-	-	-	-
NCU07569	-4.02039	-2.40014	-	cell wall (GO:0005618)	structural constituent of cell wall (GO:0005199)	Yeast PIR protein repeat (PF00399)
NCU07823	0	-2.3989	melanin metabolic process (GO:0006582)	-	scytalone dehydratase activity (GO:0030411)	Scytalone dehydratase (PF02982)
NCU08152	0	-2.39729	transmembrane transport (GO:0055085)	integral component of membrane (GO:0016021)	transmembrane transporter activity (GO:0022857)	Sugar (and other) transporter (PF00083)
NCU00003	-1.55378	-2.39479	-	-	-	-
NCU04211	-2.09614	-2.39334	regulation of transcription, DNA-templated (GO:0006355)	-	DNA-binding transcription factor activity (GO:0003700)	bZIP transcription factor (PF00170)
NCU03654	-1.15709	-2.38816	-	-	-	-
NCU01074	0	-2.38195	-	-	-	-
NCU09103	0	-2.37733	oxidation-reduction process (GO:0055114)	-	heme binding (GO:0020037); iron ion binding (GO:0005506); oxidoreductase activity, acting on paired donors, with incorporation or reduction of molecular oxygen (GO:0016705)	Cytochrome P450 (PF00067)
NCU05798	-1.79285	-2.3707	-	-	-	-
NCU04544	-3.22041	-2.36814	-	-	-	-
NCU02931	0	-2.34848	-	-	-	-
NCU09020	-2.94729	-2.34566	transmembrane transport (GO:0055085)	integral component of membrane (GO:0016021)	-	Voltage-dependent anion channel (PF03595)
NCU07074	-1.22257	-2.32893	lipid metabolic process (GO:0006629)	-	-	Patatin-like phospholipase (PF01734)
NCU08435	-2.25988	-2.32724	-	-	RNA-directed 5'-3' RNA polymerase activity (GO:0003968)	RNA dependent RNA polymerase (PF05183)
NCU09174	-1.6932	-2.32379	-	-	-	-
NCU06114	-3.32066	-2.31575	-	-	-	-
NCU06719	-1.8267	-2.31539	-	-	-	PRELI-like family (PF04707)
NCU01039	-1.65502	-2.31125	-	-	-	-
NCU04341	-1.42023	-2.3059	-	-	-	-
NCU04560	0	-2.30474	-	-	-	-
NCU05860	0	-2.29723	-	-	-	-
NCU04542	-1.78296	-2.29583	-	-	-	-
NCU01845	-1.06684	-2.28738	-	-	-	Histidine phosphatase superfamily (branch 1) (PF00300)
NCU00574	-2.70833	-2.28681	-	-	-	-
NCU00604	-1.84517	-2.2868	-	-	-	RNA 3'-terminal phosphate cyclase (PF01137)
NCU04246	-1.31007	-2.27998	metabolic process (GO:0008152)	-	catalytic activity (GO:0003824)	Amino-transferase class IV (PF01063)
NCU03403	0	-2.27924	-	-	-	-
NCU05351	0	-2.27838	-	-	-	-
NCU04645	-1.61037	-2.27462	-	-	-	Mitochondrial biogenesis AIM24 (PF01987)
NCU07389	-2.67193	-2.27088	-	-	protein binding (GO:0005515)	SAM domain (Sterile alpha motif) (PF07647)
NCU05836	-2.39811	-2.27001	-	membrane (GO:0016020)	mannosyl-oligosaccharide 1,2-alpha-mannosidase activity (GO:0004571); calcium ion binding (GO:0005509)	Glycosyl hydrolase family 47 (PF01532)
NCU00715	-4.12558	-2.26592	metabolic process (GO:0008152); oxidation-reduction process (GO:0055114)	-	oxidoreductase activity (GO:0016491)	Aldehyde dehydrogenase family (PF00171)
NCU01871	-1.1013	-2.26101	-	-	protein dimerization activity (GO:0046983)	Helix-loop-helix DNA-binding domain (PF00010)
NCU09556	0	-2.25345	-	-	DNA binding (GO:0003677)	Homeobox domain (PF00046)
NCU04284	-1.95389	-2.25337	-	-	-	-
NCU05319	1.56684	-2.25246	-	-	-	LysM domain (PF01476)
NCU07379	-1.65637	-2.25206	-	-	-	-
NCU07933	-3.97526	-2.25131	-	-	-	-
NCU09562	-1.26414	-2.24992	-	-	-	-
NCU06939	-1.25979	-2.24449	-	-	protein binding (GO:0005515)	JAB1/Mov34/MPN/PAD-1 ubiquitin protease (PF01398); USP8 dimerisation domain (PF08969)
NCU11331	0	-2.24304	protein phosphorylation (GO:0006468)	-	ATP binding (GO:0005524); protein kinase activity (GO:0004672)	Protein kinase domain (PF00069)
NCU02890	-2.50304	-2.23992	-	-	-	-
NCU11050	-2.56483	-2.23959	RNA polyadenylation (GO:0043631)	-	polynucleotide adenylyltransferase activity (GO:0004652)	2'-5' RNA ligase superfamily (PF13563); Poly(A) polymerase central domain (PF04928); Protein of unknown function (DUF504) (PF04457); Endonuclease/Exonuclease/phosphatase family (PF03372)
NCU01140	-2.55797	-2.23814	-	-	-	Alanine dehydrogenase/PNT, C-terminal domain (PF01262); NAD(P) transhydrogenase beta subunit (PF02233); 4TM region of pyridine nucleotide transhydrogenase, mitoch (PF12769); Alanine dehydrogenase/PNT, N-terminal domain (PF05222)
NCU01428	-2.35691	-2.2364	-	-	-	HIUase/Transthyretin family (PF00576)
NCU05277	-4.15668	-2.23276	-	-	-	-
NCU05807	-2.46373	-2.23076	metabolic process (GO:0008152)	-	catalytic activity (GO:0003824)	2OG-Fe(II) oxygenase superfamily (PF13532); Isochorismatase family (PF00857)
NCU01754	-2.12977	-2.22746	oxidation-reduction process (GO:0055114)	-	-	Zinc-binding dehydrogenase (PF00107); Alcohol dehydrogenase GroES-like domain (PF08240)
NCU05786	-1.54019	-2.22627	-	-	-	-
NCU08821	-1.88477	-2.22235	-	-	-	Kelch motif (PF13854)
NCU01072	-2.24764	-2.22144	-	-	-	Class II Aldolase and Adducin N-terminal domain (PF00596)
NCU04371	0	-2.21794	-	-	-	FKBP-type peptidyl-prolyl cis-trans isomerase (PF00254)
NCU04950	-2.59637	-2.21662	-	-	-	-
NCU07769	-1.37416	-2.21594	-	-	-	-
NCU03646	-1.98353	-2.21432	response to oxidative stress (GO:0006979); oxidation-reduction process (GO:0055114)	-	heme binding (GO:0020037); peroxidase activity (GO:0004601)	WSC domain (PF01822); Peroxidase (PF00141)
NCU09670	-2.70719	-2.21187	-	-	hydrolase activity (GO:0016787)	Amidohydrolase family (PF01979)
NCU04732	-2.33059	-2.20909	-	-	-	-
NCU01898	-2.49917	-2.20286	-	-	-	-
NCU01289	-2.68158	-2.20094	-	-	-	-
NCU02138	-1.81765	-2.19224	-	-	-	-
NCU04952	0	-2.19094	carbohydrate metabolic process (GO:0005975)	-	hydrolase activity, hydrolyzing O-glycosyl compounds (GO:0004553)	Glycosyl hydrolase family 3 N terminal domain (PF00933); Fibronectin type III-like domain (PF14310); Glycosyl hydrolase family 3 C-terminal domain (PF01915)
NCU01678	-2.53174	-2.1894	oxidation-reduction process (GO:0055114)	-	oxidoreductase activity (GO:0016491)	Flavin containing amine oxidoreductase (PF01593)
NCU01972	-3.47425	-2.18926	-	-	-	-
NCU06783	0	-2.1885	-	-	-	ATP citrate lyase citrate-binding (PF16114); ATP-grasp domain (PF08442)
NCU02343	-2.85165	-2.1856	L-arabinose metabolic process (GO:0046373)	-	alpha-L-arabinofuranosidase activity (GO:0046556)	Alpha-L-arabinofuranosidase C-terminal domain (PF06964)
NCU07834	0	-2.18444	-	-	-	Myb-like DNA-binding domain (PF00249); Myb-like DNA-binding domain (PF13921)
NCU02097	-1.41495	-2.17992	-	-	-	Enoyl-(Acyl carrier protein) reductase (PF13561)
NCU06417	-2.43398	-2.17871	-	-	hydrolase activity (GO:0016787)	Amidohydrolase (PF04909)
NCU02988	0	-2.17854	metabolic process (GO:0008152)	-	methyltransferase activity (GO:0008168)	Methyltransferase domain (PF08241)
NCU00633	-1.70953	-2.17689	-	-	-	Acetyltransferase (GNAT) domain (PF13527)
NCU01294	0	-2.17369	nitrogen compound metabolic process (GO:0006807)	-	hydrolase activity, acting on carbon-nitrogen (but not peptide) bonds (GO:0016810)	Carbon-nitrogen hydrolase (PF00795)
NCU01886	-2.59151	-2.1719	-	-	-	-
NCU07484	-2.97869	-2.15806	carbohydrate metabolic process (GO:0005975)	-	-	LysM domain (PF01476); Glycosyl hydrolases family 18 (PF00704); Pathogen effector; putative necrosis-inducing factor (PF14856)
NCU16806	-2.38386	-2.14917	-	integral component of membrane (GO:0016021)	-	Interferon-induced 6-16 family (PF06140)
NCU02470	-2.07458	-2.1455	-	-	-	Cysteine-rich secretory protein family (PF00188)
NCU09955	0	-2.14488	transmembrane transport (GO:0055085)	integral component of membrane (GO:0016021)	-	Voltage-dependent anion channel (PF03595)
NCU03771	-1.9962	-2.1343	-	-	-	-
NCU09504	0	-2.13166	-	-	-	-
NCU07827	-1.20437	-2.13135	-	-	-	-
NCU08226	0	-2.13024	-	-	-	Glycosyl transferase family 2 (PF00535)
NCU00811	-2.18182	-2.11786	-	-	-	-
NCU06373	0	-2.11727	-	-	-	-
NCU05767	2.38085	-2.11279	regulation of transcription, DNA-templated (GO:0006355)	nucleus (GO:0005634)	zinc ion binding (GO:0008270); RNA polymerase II transcription factor activity, sequence-specific DNA binding (GO:0000981)	Fungal specific transcription factor domain (PF11951); Fungal Zn(2)-Cys(6) binuclear cluster domain (PF00172)
NCU07080	0	-2.11031	-	-	oxidoreductase activity (GO:0016491)	Oxidoreductase family, NAD-binding Rossmann fold (PF01408)
NCU00509	0	-2.10928	-	-	-	-
NCU08228	0	-2.10768	oxidation-reduction process (GO:0055114)	-	oxidoreductase activity, acting on the CH-OH group of donors, NAD or NADP as acceptor (GO:0016616); NAD binding (GO:0051287)	UDP-glucose/GDP-mannose dehydrogenase family, UDP binding domain (PF03720); UDP-glucose/GDP-mannose dehydrogenase family, NAD binding domain (PF03721); UDP-glucose/GDP-mannose dehydrogenase family, central domain (PF00984)
NCU07318	0	-2.10554	oxidation-reduction process (GO:0055114)	-	oxidoreductase activity (GO:0016491); coenzyme binding (GO:0050662)	Mannitol dehydrogenase C-terminal domain (PF08125); Mannitol dehydrogenase Rossmann domain (PF01232)
NCU06698	0	-2.09474	-	-	transferase activity, transferring glycosyl groups (GO:0016757)	Glycosyl transferase family 8 (PF01501)
NCU01860	0	-2.08613	-	-	-	-
NCU08188	-4.16754	-2.07959	-	-	-	-
NCU05770	0	-2.07906	response to oxidative stress (GO:0006979); oxidation-reduction process (GO:0055114)	-	heme binding (GO:0020037); peroxidase activity (GO:0004601)	Peroxidase (PF00141)
NCU03208	-1.55455	-2.0726	-	-	-	-
NCU05394	-3.69966	-2.07173	transmembrane transport (GO:0055085)	integral component of membrane (GO:0016021)	-	Major Facilitator Superfamily (PF07690)
NCU01098	0	-2.06759	-	-	-	Ankyrin repeats (3 copies) (PF12796)
NCU09010	-2.90437	-2.05897	-	-	-	Protein of unknown function (DUF2841) (PF11001)
NCU01812	0	-2.05874	-	-	-	-
NCU08331	0	-2.05869	-	-	-	Hamartin protein (PF04388)
NCU17155	-2.55005	-2.05857	-	-	-	-
NCU05887	8.26652	-2.0559	-	-	-	-
NCU09886	0	-2.05182	-	-	-	-
NCU01629	0	-2.05076	-	-	-	Zinc finger, C2H2 type (PF00096)
NCU04342	-4.37081	-2.04499	metabolic process (GO:0008152)	-	carbon-sulfur lyase activity (GO:0016846)	Glutathione-dependent formaldehyde-activating enzyme (PF04828)
NCU00761	0	-2.04403	-	-	-	Carboxylesterase family (PF00135)
NCU09615	-1.61678	-2.04328	regulation of transcription, DNA-templated (GO:0006355)	nucleus (GO:0005634)	zinc ion binding (GO:0008270); RNA polymerase II transcription factor activity, sequence-specific DNA binding (GO:0000981)	Fungal specific transcription factor domain (PF11951); Fungal Zn(2)-Cys(6) binuclear cluster domain (PF00172)
NCU05875	0	-2.04021	-	-	-	-
NCU07027	-1.98305	-2.03966	carbohydrate metabolic process (GO:0005975)	-	glycogen phosphorylase activity (GO:0008184)	Carbohydrate phosphorylase (PF00343)
NCU02326	0	-2.03445	-	-	-	HMG (high mobility group) box (PF00505)
NCU02061	0	-2.02793	-	-	-	WSC domain (PF01822)
NCU09772	-1.43053	-2.02041	-	-	-	Ankyrin repeats (many copies) (PF13857); Heterokaryon incompatibility protein (HET) (PF06985)
NCU06989	-1.39081	-2.01867	-	-	-	Senescence-associated protein (PF06911)
NCU05969	-2.16156	-2.01663	-	-	-	Glycosyl hydrolase family 61 (PF03443)
NCU04496	-1.61258	-2.01548	-	-	electron transfer activity (GO:0009055)	Plastocyanin-like domain (PF02298)
NCU06170	-1.01417	-2.01486	-	-	-	Protein of unknown function (DUF3129) (PF11327)
NCU05948	-2.71089	-2.01135	-	-	-	-
NCU06467	0	-2.00425	-	-	-	-
NCU09188	-2.84338	-1.99749	-	-	-	-
NCU00573	-1.83656	-1.99637	-	-	-	Hsp70 protein (PF00012)
NCU06235	-2.83579	-1.99544	-	-	-	Domain of unknown function (DUF4451) (PF14616)
NCU01487	-1.12316	-1.9951	-	-	-	Protein of unknown function (DUF3984) (PF13136)
NCU09126	0	-1.99404	-	-	-	-
NCU00642	0	-1.99184	-	-	-	Beta-galactosidase, domain 3 (PF13363); Glycosyl hydrolases family 35 (PF01301); Beta-galactosidase jelly roll domain (PF13364); Beta-galactosidase, domain 2 (PF10435)
NCU06042	-1.69128	-1.9857	-	-	-	FAD binding domain (PF00890)
NCU04446	-3.06222	-1.98185	transmembrane transport (GO:0055085)	integral component of membrane (GO:0016021)	-	Major Facilitator Superfamily (PF07690)
NCU07951	-1.61626	-1.98048	-	-	-	-
NCU09287	0	-1.98031	transmembrane transport (GO:0055085)	integral component of membrane (GO:0016021)	transmembrane transporter activity (GO:0022857)	Sugar (and other) transporter (PF00083)
NCU09027	0	-1.97039	transmembrane transport (GO:0055085)	integral component of membrane (GO:0016021)	-	Major Facilitator Superfamily (PF07690)
NCU05230	-2.02647	-1.96974	-	membrane (GO:0016020)	-	Membrane-associating domain (PF01284)
NCU11046	-2.41063	-1.96468	-	-	peroxidase activity (GO:0004601)	Peroxidase, family 2 (PF01328)
NCU10500	-1.31029	-1.96448	-	-	-	-
NCU09760	-1.82188	-1.96216	-	-	-	AAA ATPase domain (PF13191); Ankyrin repeats (3 copies) (PF12796)
NCU11306	0	-1.95837	oxidation-reduction process (GO:0055114)	-	heme binding (GO:0020037); iron ion binding (GO:0005506); oxidoreductase activity, acting on paired donors, with incorporation or reduction of molecular oxygen (GO:0016705)	Cytochrome P450 (PF00067)
NCU00716	-2.47916	-1.95299	-	-	-	-
NCU09037	0	-1.95179	-	-	-	Heterokaryon incompatibility protein (HET) (PF06985)
NCU09186	0	-1.95066	-	-	-	15-O-acetyltransferase Tri3 (PF07428)
NCU04905	-1.59632	-1.94847	-	-	-	Methyltransferase domain (PF13489)
NCU07463	0	-1.94124	-	-	-	Tetratricopeptide repeat (PF13424)
NCU07083	-2.59855	-1.93638	-	-	-	-
NCU08746	-3.0506	-1.93512	-	-	starch binding (GO:2001070)	Starch binding domain (PF00686); Lytic polysaccharide mono-oxygenase, cellulose-degrading (PF03067)
NCU10038	-2.69136	-1.93387	lipid metabolic process (GO:0006629)	-	phosphoric diester hydrolase activity (GO:0008081)	Glycerophosphoryl diester phosphodiesterase family (PF03009)
NCU02636	0	-1.93333	-	-	-	Ubiquitin-conjugating enzyme (PF00179)
NCU05429	-1.11396	-1.92963	carbohydrate metabolic process (GO:0005975)	-	hydrolase activity, hydrolyzing O-glycosyl compounds (GO:0004553); cation binding (GO:0043169); catalytic activity (GO:0003824)	Alpha amylase, C-terminal all-beta domain (PF02806); Carbohydrate-binding module 48 (Isoamylase N-terminal domain) (PF02922); Alpha amylase, catalytic domain (PF00128)
NCU01789	-1.36767	-1.92353	-	-	-	-
NCU08225	-2.67328	-1.92216	nickel cation transmembrane transport (GO:0035444)	integral component of membrane (GO:0016021)	metal ion binding (GO:0046872); nickel cation transmembrane transporter activity (GO:0015099)	High-affinity nickel-transport protein (PF03824)
NCU07191	-2.62241	-1.91927	-	-	-	-
NCU10070	0	-1.90915	-	-	-	-
NCU01086	0	-1.90698	oxidation-reduction process (GO:0055114)	-	heme binding (GO:0020037); iron ion binding (GO:0005506); oxidoreductase activity, acting on paired donors, with incorporation or reduction of molecular oxygen (GO:0016705)	Cytochrome P450 (PF00067)
NCU03107	0	-1.90613	transmembrane transport (GO:0055085)	integral component of membrane (GO:0016021)	-	Major Facilitator Superfamily (PF07690)
NCU07175	-1.79735	-1.90443	amino acid transmembrane transport (GO:0003333)	membrane (GO:0016020)	amino acid transmembrane transporter activity (GO:0015171)	Amino acid permease (PF13520)
NCU09868	-3.6606	-1.90391	-	-	-	-
NCU09755	-2.17813	-1.90381	-	-	-	-
NCU03013	0	-1.90201	superoxide metabolic process (GO:0006801)	-	metal ion binding (GO:0046872)	Copper/zinc superoxide dismutase (SODC) (PF00080)
NCU09152	0	-1.90094	-	-	-	-
NCU02359	0	-1.89971	peroxisome inheritance (GO:0045033)	extrinsic component of intraperoxisomal membrane (GO:0005780)	-	Inheritance of peroxisomes protein 1 (PF12634)
NCU07351	-1.20817	-1.89877	xylan catabolic process (GO:0045493)	extracellular region (GO:0005576)	alpha-glucuronidase activity (GO:0046559)	Glycosyl hydrolase family 67 N-terminus (PF03648); Glycosyl hydrolase family 67 middle domain (PF07488); Glycosyl hydrolase family 67 C-terminus (PF07477)
NCU02975	-5.09534	-1.894	-	-	-	-
NCU01910	-1.21774	-1.89385	-	-	-	-
NCU03179	0	-1.89339	-	-	-	-
NCU02179	0	-1.8927	oxidation-reduction process (GO:0055114)	-	flavin adenine dinucleotide binding (GO:0050660); oxidoreductase activity (GO:0016491); catalytic activity (GO:0003824)	FAD binding domain (PF01565); FAD linked oxidases, C-terminal domain (PF02913)
NCU04488	-1.74467	-1.88818	-	integral component of membrane (GO:0016021)	-	Interferon-induced 6-16 family (PF06140)
NCU00130	-2.86772	-1.87282	carbohydrate metabolic process (GO:0005975)	-	hydrolase activity, hydrolyzing O-glycosyl compounds (GO:0004553)	Glycosyl hydrolase family 1 (PF00232)
NCU00835	-1.5792	-1.87172	-	-	-	-
NCU08288	-1.9987	-1.8696	-	-	-	-
NCU04208	0	-1.8669	-	-	-	-
NCU09652	-1.44552	-1.86423	carbohydrate metabolic process (GO:0005975)	-	hydrolase activity, hydrolyzing O-glycosyl compounds (GO:0004553)	Glycosyl hydrolases family 43 (PF04616)
NCU02976	-1.39993	-1.8635	-	-	-	-
NCU00865	-2.43692	-1.86207	-	-	nutrient reservoir activity (GO:0045735)	Cupin (PF00190)
NCU09182	-2.58827	-1.85838	-	-	-	Stress responsive A/B Barrel Domain (PF07876)
NCU02479	-1.10754	-1.858	nitrogen compound metabolic process (GO:0006807)	-	glutamate-ammonia ligase activity (GO:0004356)	Glutamine synthetase, catalytic domain (PF00120)
NCU08537	0	-1.85552	-	-	-	NACHT domain (PF05729)
NCU03274	-1.24219	-1.85348	-	-	-	LYAR-type C2HC zinc finger (PF08790)
NCU06111	0	-1.85026	-	-	GTPase activity (GO:0003924); GTP binding (GO:0005525)	Ras family (PF00071)
NCU08886	0	-1.84426	metabolic process (GO:0008152)	-	hydrolase activity (GO:0016787)	Peptidase dimerisation domain (PF07687); Peptidase family M20/M25/M40 (PF01546)
NCU16741	0	-1.84403	-	-	-	-
NCU00270	-2.73145	-1.8426	-	-	-	-
NCU10836	-1.45029	-1.83931	-	-	-	-
NCU04909	0	-1.83775	-	-	-	Methyltransferase domain (PF13489)
NCU03648	-1.62392	-1.83709	-	-	-	Domain of unknown function (DUF4965) (PF16335); Domain of unknown function (DUF1793) (PF08760); Domain of unknown function (DUF5127) (PF17168)
NCU00743	-1.33316	-1.83254	-	-	-	Glycogen debranching enzyme, glucanotransferase domain (PF14701); Central domain of human glycogen debranching enzyme (PF14702); N-terminal domain from the human glycogen debranching enzyme (PF14699); Amylo-alpha-1,6-glucosidase (PF06202)
NCU06387	-1.81266	-1.83243	-	-	-	-
NCU06486	0	-1.82748	protein phosphorylation (GO:0006468)	-	protein binding (GO:0005515); ATP binding (GO:0005524); protein kinase activity (GO:0004672)	Protein kinase domain (PF00069); FHA domain (PF00498)
NCU07932	-2.74813	-1.82645	-	-	-	-
NCU00905	0	-1.82123	-	-	-	Amidase (PF01425)
NCU08842	0	-1.81652	-	-	-	-
NCU02192	0	-1.81135	-	-	-	-
NCU08776	-2.67696	-1.80939	-	membrane (GO:0016020)	-	Calcium-dependent channel, 7TM region, putative phosphate (PF02714); Extracellular tail, of 10TM putative phosphate transporter (PF12621); Late exocytosis, associated with Golgi transport (PF13967); Cytosolic domain of 10TM putative phosphate transporter (PF14703)
NCU03645	-2.46981	-1.8079	-	-	microtubule binding (GO:0008017)	Growth-Arrest-Specific Protein 2 Domain (PF02187)
NCU04148	0	-1.8072	-	-	-	-
NCU09617	0	-1.80443	-	-	-	-
NCU03781	0	-1.80339	-	-	-	CobW/HypB/UreG, nucleotide-binding domain (PF02492)
NCU08167	0	-1.80124	-	-	-	Acetyltransferase (GNAT) domain (PF13523)
NCU11323	0	-1.80043	-	-	-	-
NCU04453	-3.69199	-1.78966	-	-	-	Heterokaryon incompatibility protein (HET) (PF06985)
NCU01720	-3.71566	-1.78823	-	-	-	Glycosyl hydrolase catalytic core (PF11790)
NCU06961	0	-1.78708	carbohydrate metabolic process (GO:0005975)	-	polygalacturonase activity (GO:0004650)	Glycosyl hydrolases family 28 (PF00295)
NCU09954	0	-1.78675	-	-	-	Heterokaryon incompatibility protein (HET) (PF06985)
NCU05869	0	-1.78417	-	-	-	-
NCU05035	-2.88676	-1.7832	-	-	-	-
NCU01291	-2.28332	-1.78299	-	-	-	-
NCU07974	-1.24406	-1.78233	-	-	-	Glycosyl hydrolase family 61 (PF03443)
NCU04528	0	-1.78141	oxidation-reduction process (GO:0055114)	-	oxidoreductase activity (GO:0016491); copper ion binding (GO:0005507)	Multicopper oxidase (PF00394); Multicopper oxidase (PF07731); Multicopper oxidase (PF07732)
NCU09536	-1.15576	-1.78104	-	-	-	-
NCU08749	0	-1.77896	oxidation-reduction process (GO:0055114)	-	flavin adenine dinucleotide binding (GO:0050660); NADP binding (GO:0050661); N,N-dimethylaniline monooxygenase activity (GO:0004499)	Flavin-binding monooxygenase-like (PF00743)
NCU08092	-2.38135	-1.77839	-	-	-	NIPSNAP (PF07978)
NCU09294	0	-1.77659	-	-	-	-
NCU01752	-1.04878	-1.77407	-	-	-	-
NCU04315	0	-1.77365	iron-sulfur cluster assembly (GO:0016226)	cytoplasm (GO:0005737)	iron-sulfur cluster binding (GO:0051536)	Cytokine-induced anti-apoptosis inhibitor 1, Fe-S biogenesis (PF05093); Fe-S cluster assembly protein DRE2 N-terminus (PF16803)
NCU09169	-1.96401	-1.77267	-	-	-	NmrA-like family (PF05368)
NCU00378	-1.70568	-1.76961	metabolic process (GO:0008152); oxidation-reduction process (GO:0055114)	-	oxidoreductase activity (GO:0016491)	Aldehyde dehydrogenase family (PF00171)
NCU02877	0	-1.76937	-	-	-	Glycine-rich domain-containing protein-like (PF07173)
NCU04499	0	-1.76906	-	-	-	-
NCU05236	-2.82216	-1.75521	-	-	-	-
NCU01424	-1.56201	-1.7545	metabolic process (GO:0008152)	-	carbon-sulfur lyase activity (GO:0016846)	Glutathione-dependent formaldehyde-activating enzyme (PF04828)
NCU02110	0	-1.754	oxidation-reduction process (GO:0055114)	-	oxidoreductase activity (GO:0016491)	Ferric reductase NAD binding domain (PF08030); FAD-binding domain (PF08022); Ferric reductase like transmembrane component (PF01794)
NCU03318	-1.9992	-1.7521	-	-	-	-
NCU09915	0	-1.75187	-	-	DNA binding (GO:0003677)	NDT80 / PhoG like DNA-binding family (PF05224)
NCU04881	-1.16658	-1.75022	-	-	-	NACHT domain (PF05729); Ankyrin repeats (3 copies) (PF12796); N-terminal domain of NWD NACHT-NTPase (PF17100)
NCU04906	0	-1.74045	-	-	-	Methyltransferase domain (PF13489)
NCU09144	0	-1.73939	-	-	-	-
NCU07760	-2.26129	-1.73582	carbohydrate metabolic process (GO:0005975)	extracellular region (GO:0005576)	cellulose binding (GO:0030248)	Fungal cellulose binding domain (PF00734); Glycosyl hydrolase family 61 (PF03443)
NCU08870	-2.15872	-1.73112	-	-	-	-
NCU03398	-1.15073	-1.73025	-	-	-	-
NCU06376	0	-1.72874	-	-	-	-
NCU08171	-3.07408	-1.72866	-	-	-	-
NCU09354	-1.20363	-1.72565	-	-	-	-
NCU04268	-2.2202	-1.72535	-	-	-	AhpC/TSA antioxidant enzyme (PF13911)
NCU05161	0	-1.72475	metabolic process (GO:0008152)	-	hydrolase activity (GO:0016787)	alpha/beta hydrolase fold (PF07859)
NCU07310	0	-1.71306	-	-	-	-
NCU00282	-1.78529	-1.70944	-	-	-	-
NCU07477	0	-1.70751	-	-	-	-
NCU08524	0	-1.70529	-	-	-	-
NCU05861	0	-1.70492	-	-	-	AAA domain (PF13087); AAA domain (PF13086)
NCU02799	-1.08817	-1.7031	-	-	-	-
NCU09041	0	-1.70251	-	-	-	Enoyl-(Acyl carrier protein) reductase (PF13561)
NCU02793	-1.21488	-1.70119	-	-	-	-
NCU03686	-1.97198	-1.69599	regulation of transcription, DNA-templated (GO:0006355)	nucleus (GO:0005634)	zinc ion binding (GO:0008270); RNA polymerase II transcription factor activity, sequence-specific DNA binding (GO:0000981)	Fungal specific transcription factor domain (PF11951); Fungal Zn(2)-Cys(6) binuclear cluster domain (PF00172)
NCU03253	-1.88296	-1.69592	G-protein coupled receptor signaling pathway (GO:0007186)	integral component of membrane (GO:0016021)	G-protein coupled receptor activity (GO:0004930)	7 transmembrane receptor (Secretin family) (PF00002)
NCU05953	-1.99903	-1.68832	-	-	-	Eukaryotic protein of unknown function (DUF829) (PF05705)
NCU05814	-2.85739	-1.68749	-	-	-	CFEM domain (PF05730)
NCU16491	0	-1.68645	regulation of transcription, DNA-templated (GO:0006355)	nucleus (GO:0005634)	zinc ion binding (GO:0008270); RNA polymerase II transcription factor activity, sequence-specific DNA binding (GO:0000981)	Fungal Zn(2)-Cys(6) binuclear cluster domain (PF00172)
NCU02246	-1.50736	-1.68601	-	-	-	-
NCU09235	0	-1.68473	-	-	-	conidiation-specific protein 8
NCU00987	-2.38157	-1.67945	oxidation-reduction process (GO:0055114)	-	heme binding (GO:0020037); iron ion binding (GO:0005506); oxidoreductase activity, acting on paired donors, with incorporation or reduction of molecular oxygen (GO:0016705)	Cytochrome P450 (PF00067)
NCU16848	0	-1.67655	-	-	-	-
NCU01315	-1.18615	-1.67304	-	-	protein binding (GO:0005515)	Tetratricopeptide repeat (PF13181); Glycosyl transferase family 41 (PF13844)
NCU05801	-1.07985	-1.67298	-	-	-	Protein of unknown function (DUF3176) (PF11374)
NCU07338	-3.3226	-1.6717	-	-	-	Glycosyltransferase sugar-binding region containing DXD motif (PF04488)
NCU16713	-1.89296	-1.66938	-	-	-	-
NCU08943	-2.36408	-1.66542	-	-	-	short chain dehydrogenase (PF00106)
NCU01896	0	-1.66472	-	-	-	-
NCU09038	-1.71037	-1.66454	-	-	-	-
NCU04287	-1.55128	-1.66126	-	-	-	-
NCU16477	-2.09977	-1.66003	-	-	-	-
NCU04720	-1.54122	-1.65755	oxidation-reduction process (GO:0055114)	-	oxidoreductase activity (GO:0016491); heme binding (GO:0020037); iron-sulfur cluster binding (GO:0051536); 2 iron, 2 sulfur cluster binding (GO:0051537)	Rieske [2Fe-2S] domain (PF00355); BFD-like [2Fe-2S] binding domain (PF04324); Pyridine nucleotide-disulphide oxidoreductase (PF07992); Nitrite and sulphite reductase 4Fe-4S domain (PF01077); Nitrite/Sulfite reductase ferredoxin-like half domain (PF03460)
NCU07100	-1.9267	-1.6565	-	-	-	-
NCU07358	0	-1.65414	-	-	ATP binding (GO:0005524)	Helicase conserved C-terminal domain (PF00271); SNF2 family N-terminal domain (PF00176)
NCU03591	0	-1.64303	transport (GO:0006810); transmembrane transport (GO:0055085)	integral component of membrane (GO:0016021)	ATPase activity, coupled to transmembrane movement of substances (GO:0042626); ATPase activity (GO:0016887); ATP binding (GO:0005524)	ABC transporter (PF00005); ABC transporter transmembrane region (PF00664)
NCU00102	-1.29761	-1.64255	-	-	-	-
NCU05047	0	-1.63983	-	-	-	Cytochrome b5-like Heme/Steroid binding domain (PF00173)
NCU05706	0	-1.63686	-	-	protein binding (GO:0005515)	Glutathione S-transferase, N-terminal domain (PF02798); Glutathione S-transferase, C-terminal domain (PF14497)
NCU05854	0	-1.63659	-	-	-	-
NCU03215	-1.91773	-1.63526	-	-	-	Glycosyl hydrolase family 76 (PF03663)
NCU05577	-2.47153	-1.6348	carbohydrate metabolic process (GO:0005975)	-	hydrolase activity, hydrolyzing O-glycosyl compounds (GO:0004553)	Glycosyl hydrolase family 3 N terminal domain (PF00933); Fibronectin type III-like domain (PF14310); Glycosyl hydrolase family 3 C-terminal domain (PF01915)
NCU08527	-1.18727	-1.63039	regulation of transcription, DNA-templated (GO:0006355)	nucleus (GO:0005634)	zinc ion binding (GO:0008270); RNA polymerase II transcription factor activity, sequence-specific DNA binding (GO:0000981)	Fungal Zn(2)-Cys(6) binuclear cluster domain (PF00172)
NCU05571	0	-1.6302	-	-	-	-
NCU07473	-1.37541	-1.62883	metabolic process (GO:0008152); carbohydrate metabolic process (GO:0005975); lipid glycosylation (GO:0030259)	-	transferase activity, transferring hexosyl groups (GO:0016758)	UDP-glucoronosyl and UDP-glucosyl transferase (PF00201); Glycosyltransferase family 28 N-terminal domain (PF03033)
NCU06509	-2.12956	-1.62878	-	-	-	-
NCU04521	-1.93223	-1.62483	-	-	protein binding (GO:0005515)	BTB/POZ domain (PF00651)
NCU16364	-2.32679	-1.61148	-	-	-	-
NCU00521	0	-1.6094	-	-	-	-
NCU07883	-1.60549	-1.60088	-	-	-	-
NCU08526	0	-1.60045	-	-	-	Heterokaryon incompatibility protein (HET) (PF06985)
NCU07258	-1.66478	-1.59897	-	-	-	-
NCU02046	-1.78477	-1.59816	-	-	-	-
NCU02466	-1.796	-1.59794	-	-	protein binding (GO:0005515)	WD domain, G-beta repeat (PF00400)
NCU03652	0	-1.59725	-	-	ATP binding (GO:0005524)	Ring finger domain (PF13639); Helicase conserved C-terminal domain (PF00271); SNF2 family N-terminal domain (PF00176)
NCU01430	-2.23471	-1.59435	-	-	-	Uncharacterized protein conserved in bacteria (DUF2264) (PF10022)
NCU07017	-2.20914	-1.59107	-	-	-	-
NCU03621	0	-1.59024	cortical protein anchoring (GO:0032065)	cell cortex (GO:0005938)	phospholipid binding (GO:0005543); protein binding (GO:0005515)	Meiotic cell cortex C-terminal pleckstrin homology (PF12814)
NCU00558	-2.24483	-1.58977	-	-	-	-
NCU03361	-1.53747	-1.58973	-	BLOC-1 complex (GO:0031083)	-	GCN5-like protein 1 (GCN5L1) (PF06320)
NCU03779	-1.12132	-1.58859	glycerol metabolic process (GO:0006071)	-	glycerone kinase activity (GO:0004371)	Dak1 domain (PF02733); DAK2 domain (PF02734)
NCU06203	-1.8798	-1.58703	-	-	-	Life-span regulatory factor (PF12855)
NCU07541	0	-1.58385	-	-	-	-
NCU16776	-1.12148	-1.5763	-	-	-	-
NCU02059	-2.0144	-1.57354	-	-	-	Eukaryotic aspartyl protease (PF00026)
NCU08356	-1.74128	-1.57297	-	-	-	Amidase (PF01425)
NCU10567	-1.59428	-1.57087	-	-	-	-
NCU09333	0	-1.56412	-	-	-	-
NCU05777	-1.30161	-1.56209	protein deubiquitination (GO:0016579)	-	zinc ion binding (GO:0008270); thiol-dependent ubiquitinyl hydrolase activity (GO:0036459)	UBA/TS-N domain (PF00627); Ubiquitin carboxyl-terminal hydrolase (PF00443); Zn-finger in ubiquitin-hydrolases and other protein (PF02148)
NCU05393	0	-1.5591	-	-	-	-
NCU06785	0	-1.55824	metabolic process (GO:0008152)	-	transferase activity, transferring acyl groups, acyl groups converted into alkyl on transfer (GO:0046912); cofactor binding (GO:0048037); catalytic activity (GO:0003824)	Citrate synthase, C-terminal domain (PF00285); CoA-ligase (PF00549); CoA binding domain (PF02629)
NCU08610	-2.98049	-1.55605	-	-	-	-
NCU00497	-1.68395	-1.55308	-	-	-	-
NCU03518	-2.02567	-1.55247	-	-	-	-
NCU05243	-2.48714	-1.55192	-	-	protein binding (GO:0005515)	F-box domain (PF00646)
NCU08868	-2.19595	-1.5457	lipid metabolic process (GO:0006629)	-	-	Lipase (class 3) (PF01764)
NCU01970	-1.52208	-1.54517	-	cytoplasm (GO:0005737)	racemase and epimerase activity, acting on carbohydrates and derivatives (GO:0016857)	L-rhamnose mutarotase (PF05336)
NCU06079	0	-1.54471	-	-	-	-
NCU09427	-1.28783	-1.54404	-	-	-	Slime mold cyclic AMP receptor (PF05462)
NCU01423	0	-1.54384	-	-	-	Protein of unknown function (DUF1365) (PF07103)
NCU06131	0	-1.5434	-	-	protein binding (GO:0005515)	Kelch motif (PF01344); Galactose oxidase, central domain (PF13418)
NCU09692	0	-1.54242	-	-	-	PAP2 superfamily (PF01569)
NCU05524	0	-1.54186	-	-	-	-
NCU04953	0	-1.539	-	-	-	Eukaryotic aspartyl protease (PF00026)
NCU10001	0	-1.53877	-	-	-	-
NCU05498	0	-1.53851	-	-	-	-
NCU00941	0	-1.53783	-	-	-	-
NCU09316	-1.77587	-1.53686	-	-	-	-
NCU01572	2.19191	-1.53294	-	-	-	-
NCU01319	-1.16289	-1.53208	-	-	-	Kelch motif (PF13854)
NCU05488	0	-1.53207	-	-	nucleic acid binding (GO:0003676)	RNA recognition motif. (a.k.a. RRM, RBD, or RNP domain) (PF00076)
NCU01998	-2.84028	-1.53201	-	-	GTP binding (GO:0005525)	Septin (PF00735)
NCU04767	-1.51414	-1.52833	transmembrane transport (GO:0055085); metal ion transport (GO:0030001)	membrane (GO:0016020)	metal ion transmembrane transporter activity (GO:0046873)	CorA-like Mg2+ transporter protein (PF01544); Putative serine esterase (DUF676) (PF05057)
NCU02885	-1.11525	-1.52697	protein phosphorylation (GO:0006468)	-	ATP binding (GO:0005524); protein kinase activity (GO:0004672)	Protein kinase domain (PF00069)
NCU02732	-1.74991	-1.52659	-	-	-	-
NCU00026	-1.2628	-1.52552	-	-	-	Protein of unknown function (DUF2985) (PF11204)
NCU00631	0	-1.5247	-	-	ATP binding (GO:0005524)	Helicase conserved C-terminal domain (PF00271); Zinc finger, C3HC4 type (RING finger) (PF13920); SNF2 family N-terminal domain (PF00176)
NCU09978	-1.75583	-1.52387	transmembrane transport (GO:0055085)	integral component of membrane (GO:0016021)	-	Major Facilitator Superfamily (PF07690)
NCU04639	0	-1.52049	-	membrane (GO:0016020)	-	Membrane-associating domain (PF01284)
NCU05229	0	-1.52028	-	-	-	-
NCU09108	0	-1.52024	-	-	-	Uncharacterised protein (DUF2406) (PF10295)
NCU03370	-1.27326	-1.5201	-	-	-	-
NCU02668	-2.28223	-1.51916	-	-	-	Beta-glucosidase (SUN family) (PF03856)
NCU07453	-1.50766	-1.51894	-	-	-	-
NCU07200	-1.97346	-1.5152	-	-	-	Pregnancy-associated plasma protein-A (PF05572)
NCU02507	0	-1.51482	mitochondrial pyruvate transmembrane transport (GO:0006850)	mitochondrial inner membrane (GO:0005743)	-	Uncharacterised protein family (UPF0041) (PF03650)
NCU03026	-1.24539	-1.51291	carbohydrate metabolic process (GO:0005975)	-	-	Glycosyl hydrolases family 18 (PF00704)
NCU03931	-1.6027	-1.51009	regulation of transcription, DNA-templated (GO:0006355)	nucleus (GO:0005634)	zinc ion binding (GO:0008270); RNA polymerase II transcription factor activity, sequence-specific DNA binding (GO:0000981)	Fungal Zn(2)-Cys(6) binuclear cluster domain (PF00172)
NCU11260	-1.95181	-1.51002	-	-	-	-
NCU02320	0	-1.50785	-	-	-	-
NCU01824	-2.37097	-1.50711	oxidation-reduction process (GO:0055114)	-	oxidoreductase activity (GO:0016491)	Flavin containing amine oxidoreductase (PF01593)
NCU07279	0	-1.50677	-	-	-	-
NCU00890	-1.52195	-1.5054	carbohydrate metabolic process (GO:0005975)	-	hydrolase activity, hydrolyzing O-glycosyl compounds (GO:0004553)	Glycosyl hydrolases family 2 (PF00703)
NCU09559	-1.85989	-1.502	-	-	-	Glycosyl transferases group 1 (PF00534)
NCU01856	-1.99833	-1.50081	regulation of transcription, DNA-templated (GO:0006355)	-	DNA-binding transcription factor activity (GO:0003700)	Basic region leucine zipper (PF07716)
NCU08779	-1.25733	-1.49775	-	-	protein binding (GO:0005515)	Carbohydrate/starch-binding module (family 21) (PF03370)
NCU02243	0	-1.49406	-	-	-	-
NCU03634	-1.87166	-1.49048	-	-	-	-
NCU07432	-1.45417	-1.48944	-	-	-	-
NCU00699	-1.81369	-1.48891	-	-	-	-
NCU00719	0	-1.48838	-	-	-	Putative amidoligase enzyme (PF12224)
NCU04409	0	-1.48827	-	-	-	Ankyrin repeats (many copies) (PF13857)
NCU01193	-2.28532	-1.48675	oxidation-reduction process (GO:0055114)	-	flavin adenine dinucleotide binding (GO:0050660); oxidoreductase activity, acting on CH-OH group of donors (GO:0016614)	GMC oxidoreductase (PF00732); GMC oxidoreductase (PF05199)
NCU03035	-1.30304	-1.48156	-	-	-	-
NCU04596	0	-1.48136	-	-	-	Aldo/keto reductase family (PF00248)
NCU02794	-1.15676	-1.48135	-	-	protein binding (GO:0005515)	WW domain (PF00397)
NCU08806	0	-1.48027	-	-	-	Rad51 (PF08423)
NCU02478	0	-1.47964	carbohydrate metabolic process (GO:0005975)	-	catalytic activity (GO:0003824)	Starch synthase catalytic domain (PF08323); Alpha amylase, catalytic domain (PF00128)
NCU07553	-1.24367	-1.4791	-	-	-	Velvet factor (PF11754)
NCU02134	-1.44504	-1.47268	-	-	-	Tudor domain (PF00567); Staphylococcal nuclease homologue (PF00565)
NCU00451	-3.13202	-1.47068	-	-	-	Methyltransferase domain (PF13489)
NCU08281	-1.34737	-1.46794	-	-	-	-
NCU05973	-1.84652	-1.46577	-	-	NAD+ binding (GO:0070403)	Sir2 family (PF02146)
NCU08137	0	-1.46505	-	-	-	Ribosomal protein S36, mitochondrial (PF10937)
NCU10610	0	-1.46488	cell morphogenesis involved in conjugation with cellular fusion (GO:0000753)	membrane (GO:0016020)	-	Ca2+ regulator and membrane fusion protein Fig1 (PF12351)
NCU05502	0	-1.46377	transmembrane transport (GO:0055085); metal ion transport (GO:0030001)	membrane (GO:0016020)	metal ion transmembrane transporter activity (GO:0046873)	CorA-like Mg2+ transporter protein (PF01544)
NCU08892	0	-1.463	-	-	-	COG (conserved oligomeric Golgi) complex component, COG2 (PF06148)
NCU00471	-1.73775	-1.456	-	-	-	-
NCU00867	-2.22014	-1.45537	-	-	-	Hemerythrin HHE cation binding domain (PF01814)
NCU01565	-2.35992	-1.45326	-	-	-	-
NCU06330	-1.26703	-1.45263	dephosphorylation (GO:0016311)	-	protein tyrosine/serine/threonine phosphatase activity (GO:0008138)	Dual specificity phosphatase, catalytic domain (PF00782)
NCU03108	0	-1.45161	-	-	-	Transferrin receptor-like dimerisation domain (PF04253); Peptidase family M28 (PF04389); PA domain (PF02225)
NCU06366	-1.71967	-1.45008	transmembrane transport (GO:0055085)	integral component of membrane (GO:0016021)	-	Sodium/calcium exchanger protein (PF01699)
NCU07168	-1.50983	-1.44975	-	-	-	-
NCU06324	0	-1.44923	transcription, DNA-templated (GO:0006351)	nucleus (GO:0005634)	zinc ion binding (GO:0008270); DNA binding (GO:0003677)	Fungal specific transcription factor domain (PF04082)
NCU04872	-1.82228	-1.44811	-	-	-	-
NCU00695	0	-1.44433	-	-	-	Fasciclin domain (PF02469)
NCU05518	0	-1.4391	amine metabolic process (GO:0009308); oxidation-reduction process (GO:0055114)	-	quinone binding (GO:0048038); primary amine oxidase activity (GO:0008131); copper ion binding (GO:0005507)	Copper amine oxidase, N3 domain (PF02728); Copper amine oxidase, N2 domain (PF02727); Copper amine oxidase, enzyme domain (PF01179)
NCU09674	-2.01095	-1.43859	-	-	O-methyltransferase activity (GO:0008171)	O-methyltransferase (PF01596)
NCU00790	-3.69028	-1.43857	potassium ion transmembrane transport (GO:0071805)	membrane (GO:0016020)	potassium ion transmembrane transporter activity (GO:0015079)	K+ potassium transporter (PF02705)
NCU02165	0	-1.43629	-	-	-	-
NCU02718	0	-1.43572	-	-	-	-
NCU07539	0	-1.43299	oxidation-reduction process (GO:0055114)	-	oxidoreductase activity (GO:0016491)	2OG-Fe(II) oxygenase superfamily (PF03171)
NCU09514	0	-1.42844	-	-	-	Arrestin_N terminal like (PF13002)
NCU10911	0	-1.42627	-	-	protein binding (GO:0005515)	BTB/POZ domain (PF00651)
NCU00322	0	-1.426	-	-	-	-
NCU05525	0	-1.42064	-	-	-	Transport and Golgi organisation 2 (PF05742)
NCU01135	0	-1.41992	-	-	-	-
NCU06055	-1.14526	-1.41972	proteolysis (GO:0006508)	-	serine-type endopeptidase activity (GO:0004252)	Subtilase family (PF00082)
NCU05789	-3.33698	-1.4189	carbohydrate metabolic process (GO:0005975)	-	hydrolase activity, hydrolyzing O-glycosyl compounds (GO:0004553)	Glycosyl hydrolases family 16 (PF00722)
NCU09319	0	-1.41012	-	integral component of nuclear inner membrane (GO:0005639)	-	HeH/LEM domain (PF12949); Man1-Src1p-C-terminal domain (PF09402)
NCU09570	0	-1.40802	-	-	protein binding (GO:0005515)	Glutathione S-transferase, C-terminal domain (PF13410); Glutathione S-transferase, N-terminal domain (PF13409)
NCU02253	0	-1.40794	regulation of transcription by RNA polymerase II (GO:0006357)	mediator complex (GO:0016592)	transcription coregulator activity (GO:0001104)	RNA polymerase II transcription mediator complex subunit 9 (PF07544)
NCU07474	1.18304	-1.40559	-	-	-	-
NCU03328	0	-1.4038	-	-	-	Glycosyl hydrolase family 61 (PF03443)
NCU06081	-3.31781	-1.4005	-	-	-	-
NCU08720	0	-1.39593	-	-	-	Alternaria alternata allergen 1 (PF16541)
NCU06305	-2.79811	-1.39513	transmembrane transport (GO:0055085)	integral component of membrane (GO:0016021)	-	Major Facilitator Superfamily (PF07690)
NCU01768	-1.95082	-1.39404	-	-	-	Glycosyl hydrolase family 63 C-terminal domain (PF03200)
NCU03878	0	-1.3937	transcription, DNA-templated (GO:0006351)	nucleus (GO:0005634)	zinc ion binding (GO:0008270); DNA binding (GO:0003677)	Zinc finger, C2H2 type (PF00096); Fungal specific transcription factor domain (PF04082)
NCU03486	-1.19349	-1.39285	-	-	-	-
NCU17154	-1.98452	-1.39143	-	-	-	-
NCU09123	-1.4609	-1.39121	protein phosphorylation (GO:0006468)	-	ATP binding (GO:0005524); protein kinase activity (GO:0004672)	Protein kinase domain (PF00069)
NCU08795	0	-1.38998	-	-	hydrolase activity (GO:0016787)	Calcineurin-like phosphoesterase (PF00149)
NCU01815	0	-1.38766	-	-	-	Eukaryotic cytochrome b561 (PF03188)
NCU07404	-1.36285	-1.38736	mannose metabolic process (GO:0006013)	-	alpha-mannosidase activity (GO:0004559)	Glycosyl hydrolases family 38 C-terminal domain (PF07748); Alpha mannosidase middle domain (PF09261); Glycosyl hydrolases family 38 N-terminal domain (PF01074)
NCU08054	-2.02463	-1.38304	carbohydrate metabolic process (GO:0005975)	-	hydrolase activity, hydrolyzing O-glycosyl compounds (GO:0004553)	Glycosyl hydrolase family 3 N terminal domain (PF00933); Fibronectin type III-like domain (PF14310); Glycosyl hydrolase family 3 C-terminal domain (PF01915)
NCU02767	-1.49977	-1.37959	-	-	-	-
NCU04774	-2.09748	-1.37944	-	-	-	-
NCU00955	-1.49579	-1.37776	-	-	-	NAD(P)-binding Rossmann-like domain (PF13450)
NCU11308	-1.12886	-1.37224	-	-	-	-
NCU07203	0	-1.37148	-	-	-	-
NCU01441	0	-1.36741	nucleoside triphosphate catabolic process (GO:0009143)	-	nucleoside-triphosphate diphosphatase activity (GO:0047429)	Ham1 family (PF01725)
NCU06718	-1.12701	-1.36583	-	nucleus (GO:0005634)	zinc ion binding (GO:0008270)	Zinc knuckle (PF13696); DWNN domain (PF08783)
NCU16405	-1.37138	-1.36479	-	-	-	-
NCU01881	-1.10556	-1.36278	-	-	-	-
NCU04383	-1.62882	-1.36221	-	-	protein binding (GO:0005515)	F-box domain (PF00646)
NCU05074	0	-1.35904	-	-	-	-
NCU04269	0	-1.35887	-	-	-	Eukaryotic aspartyl protease (PF00026)
NCU12058	0	-1.35393	oxidation-reduction process (GO:0055114)	-	oxidoreductase activity (GO:0016491)	Pyridine nucleotide-disulphide oxidoreductase (PF07992)
NCU00289	-1.06845	-1.35126	transcription, DNA-templated (GO:0006351); regulation of transcription, DNA-templated (GO:0006355)	nucleus (GO:0005634)	zinc ion binding (GO:0008270); DNA binding (GO:0003677); RNA polymerase II transcription factor activity, sequence-specific DNA binding (GO:0000981)	Fungal Zn(2)-Cys(6) binuclear cluster domain (PF00172); Fungal specific transcription factor domain (PF04082)
NCU08962	0	-1.34791	-	-	-	-
NCU04360	0	-1.34725	-	-	-	-
NCU02390	0	-1.34654	-	-	-	-
NCU07334	0	-1.34555	transmembrane transport (GO:0055085)	membrane (GO:0016020)	transporter activity (GO:0005215)	Permease for cytosine/purines, uracil, thiamine, allantoin (PF02133)
NCU08565	0	-1.343	-	-	-	NACHT domain (PF05729)
NCU10239	-2.33293	-1.34275	transmembrane transport (GO:0055085)	integral component of membrane (GO:0016021)	-	Major Facilitator Superfamily (PF07690)
NCU07287	0	-1.33949	-	-	-	-
NCU08443	-2.47036	-1.3394	transcription, DNA-templated (GO:0006351); regulation of transcription, DNA-templated (GO:0006355)	nucleus (GO:0005634)	zinc ion binding (GO:0008270); DNA binding (GO:0003677); RNA polymerase II transcription factor activity, sequence-specific DNA binding (GO:0000981)	Fungal Zn(2)-Cys(6) binuclear cluster domain (PF00172); Fungal specific transcription factor domain (PF04082)
NCU00392	0	-1.33789	-	-	-	Tc5 transposase DNA-binding domain (PF03221)
NCU09505	-2.854	-1.33334	-	-	-	-
NCU08907	-3.1561	-1.33305	-	-	-	Blastomyces yeast-phase-specific protein (PF04681)
NCU16503	-1.91494	-1.3328	-	-	-	Heterokaryon incompatibility protein (HET) (PF06985)
NCU01078	0	-1.33209	metabolic process (GO:0008152); oxidation-reduction process (GO:0055114)	-	oxidoreductase activity, acting on the CH-OH group of donors, NAD or NADP as acceptor (GO:0016616); NAD binding (GO:0051287)	D-isomer specific 2-hydroxyacid dehydrogenase, catalytic domain (PF00389); D-isomer specific 2-hydroxyacid dehydrogenase, NAD binding domain (PF02826)
NCU00995	-2.1944	-1.32989	-	-	-	-
NCU01844	0	-1.32721	-	-	-	Protein of unknown function (DUF1168) (PF06658)
NCU03905	0	-1.32582	regulation of transcription, DNA-templated (GO:0006355)	-	DNA-binding transcription factor activity (GO:0003700)	bZIP transcription factor (PF00170); Transcription factor PAP1 (PF08601)
NCU02950	0	-1.32432	-	-	-	-
NCU06316	0	-1.3226	gene silencing by RNA (GO:0031047)	ARC complex (GO:0033167)	-	Argonaute siRNA chaperone (ARC) complex subunit Arb1 (PF09692)
NCU04692	0	-1.32085	-	-	-	-
NCU16683	0	-1.31752	-	-	-	-
NCU09741	-1.04994	-1.3172	oxidation-reduction process (GO:0055114)	-	oxidoreductase activity (GO:0016491); FMN binding (GO:0010181)	FAD binding domain (PF00667); Oxidoreductase NAD-binding domain (PF00175); Flavodoxin (PF00258)
NCU01425	-2.56025	-1.31472	-	-	-	-
NCU06691	-1.17717	-1.31293	-	-	-	-
NCU07113	-1.76654	-1.30915	oxidation-reduction process (GO:0055114)	-	flavin adenine dinucleotide binding (GO:0050660); oxidoreductase activity, acting on CH-OH group of donors (GO:0016614)	GMC oxidoreductase (PF05199); GMC oxidoreductase (PF00732)
NCU06906	0	-1.3066	-	-	-	-
NCU00751	0	-1.3032	-	-	-	-
NCU04480	-1.75019	-1.30193	-	-	-	Protein of unknown function (DUF1295) (PF06966)
NCU11053	-1.61109	-1.30074	-	-	protein binding (GO:0005515)	PDZ domain (PF13180)
NCU04088	-1.61785	-1.29977	-	-	-	-
NCU08807	0	-1.29731	-	-	-	Zinc finger, C2H2 type (PF00096)
NCU01180	0	-1.2949	-	-	-	Ubiquitin carboxyl-terminal hydrolase (PF13423)
NCU09829	1.79393	-1.29323	transcription, DNA-templated (GO:0006351)	nucleus (GO:0005634)	zinc ion binding (GO:0008270); DNA binding (GO:0003677)	Fungal specific transcription factor domain (PF04082)
NCU01476	-1.51568	-1.28917	-	-	-	Putative serine esterase (DUF676) (PF05057)
NCU04848	0	-1.28903	transcription, DNA-templated (GO:0006351)	nucleus (GO:0005634)	zinc ion binding (GO:0008270); DNA binding (GO:0003677)	Zinc finger, C2H2 type (PF00096); Fungal specific transcription factor domain (PF04082)
NCU07210	-1.83571	-1.2883	-	-	-	-
NCU04254	0	-1.28697	-	-	-	-
NCU01883	-1.43098	-1.28512	-	cytoplasm (GO:0005737)	protein binding (GO:0005515)	SH3 domain (PF00018); BAR domain (PF03114)
NCU03268	-1.71057	-1.28212	-	-	-	3' exoribonuclease family, domain 1 (PF01138)
NCU02691	-1.64198	-1.28027	-	-	-	-
NCU08901	0	-1.27888	transcription, DNA-templated (GO:0006351)	nucleus (GO:0005634)	zinc ion binding (GO:0008270); DNA binding (GO:0003677)	Fungal specific transcription factor domain (PF04082)
NCU04001	-1.45515	-1.27882	regulation of transcription, DNA-templated (GO:0006355)	nucleus (GO:0005634)	zinc ion binding (GO:0008270); acetyltransferase activity (GO:0016407); RNA polymerase II transcription factor activity, sequence-specific DNA binding (GO:0000981)	Maltose acetyltransferase (PF12464); Hexapeptide repeat of succinyl-transferase (PF14602); Fungal Zn(2)-Cys(6) binuclear cluster domain (PF00172); Bacterial transferase hexapeptide (six repeats) (PF00132)
NCU09764	0	-1.27305	carbohydrate metabolic process (GO:0005975)	extracellular region (GO:0005576)	cellulose binding (GO:0030248)	Fungal cellulose binding domain (PF00734)
NCU06003	-3.24388	-1.27121	biosynthetic process (GO:0009058)	-	nucleotidyltransferase activity (GO:0016779)	Nucleotidyl transferase (PF00483); Bacterial transferase hexapeptide (six repeats) (PF00132)
NCU07333	0	-1.27008	-	-	ATP binding (GO:0005524)	AAA domain (Cdc48 subfamily) (PF07724)
NCU05916	0	-1.26911	-	-	-	Cryptococcal mannosyltransferase 1 (PF11735)
NCU01893	0	-1.26781	-	-	-	-
NCU16901	-1.37698	-1.26726	-	-	-	Glycosyl hydrolase catalytic core (PF11790)
NCU05141	0	-1.26487	-	-	-	-
NCU00700	-1.25113	-1.26311	-	-	-	-
NCU07003	-1.99513	-1.25822	-	-	-	-
NCU06296	0	-1.25754	oxidation-reduction process (GO:0055114)	-	flavin adenine dinucleotide binding (GO:0050660); NADP binding (GO:0050661); N,N-dimethylaniline monooxygenase activity (GO:0004499)	Flavin-binding monooxygenase-like (PF00743)
NCU06687	-1.01982	-1.25715	glycogen biosynthetic process (GO:0005978)	-	glycogen (starch) synthase activity (GO:0004373)	Glycogen synthase (PF05693)
NCU06772	-2.43954	-1.25457	-	-	-	-
NCU09842	-1.29903	-1.25418	protein phosphorylation (GO:0006468)	-	ATP binding (GO:0005524); protein kinase activity (GO:0004672)	Protein kinase domain (PF00069)
NCU01528	-2.13381	-1.24809	oxidation-reduction process (GO:0055114)	-	oxidoreductase activity, acting on the aldehyde or oxo group of donors, NAD or NADP as acceptor (GO:0016620)	Glyceraldehyde 3-phosphate dehydrogenase, C-terminal domain (PF02800); Glyceraldehyde 3-phosphate dehydrogenase, NAD binding domain (PF00044)
NCU04295	-1.43093	-1.24518	transcription, DNA-templated (GO:0006351); regulation of transcription, DNA-templated (GO:0006355)	nucleus (GO:0005634)	zinc ion binding (GO:0008270); DNA binding (GO:0003677); RNA polymerase II transcription factor activity, sequence-specific DNA binding (GO:0000981)	Fungal Zn(2)-Cys(6) binuclear cluster domain (PF00172); Fungal specific transcription factor domain (PF04082)
NCU09045	-1.46975	-1.24502	-	-	-	Heterokaryon incompatibility protein (HET) (PF06985)
NCU07307	0	-1.24462	oxidation-reduction process (GO:0055114)	-	enoyl-[acyl-carrier-protein] reductase (NADH) activity (GO:0004318)	N-terminal half of MaoC dehydratase (PF13452); MaoC like domain (PF01575); Domain of unknown function (DUF1729) (PF08354); Acyl transferase domain (PF00698)
NCU05278	-1.78691	-1.24408	oxidation-reduction process (GO:0055114)	-	heme binding (GO:0020037); iron ion binding (GO:0005506); oxidoreductase activity, acting on paired donors, with incorporation or reduction of molecular oxygen (GO:0016705)	Cytochrome P450 (PF00067)
NCU00027	0	-1.24226	-	-	-	Sen15 protein (PF09631)
NCU07723	0	-1.24125	-	-	-	Aldo/keto reductase family (PF00248)
NCU00499	-2.02907	-1.23992	regulation of transcription, DNA-templated (GO:0006355)	-	DNA-binding transcription factor activity (GO:0003700)	bZIP transcription factor (PF00170)
NCU08977	-1.58726	-1.23902	oxidation-reduction process (GO:0055114)	-	flavin adenine dinucleotide binding (GO:0050660); oxidoreductase activity, acting on CH-OH group of donors (GO:0016614)	GMC oxidoreductase (PF05199); GMC oxidoreductase (PF00732)
NCU06893	0	-1.23895	-	-	protein binding (GO:0005515)	CUE domain (PF02845)
NCU06130	0	-1.23445	-	-	-	-
NCU05632	0	-1.23319	-	-	-	-
NCU04048	0	-1.23266	-	-	deaminase activity (GO:0019239)	Adenosine/AMP deaminase (PF00962)
NCU07098	-1.21416	-1.23193	-	-	protein binding (GO:0005515)	Ankyrin repeat (PF00023)
NCU02801	0	-1.23188	-	integral component of membrane (GO:0016021)	-	TspO/MBR family (PF03073)
NCU02098	-1.84676	-1.22693	-	-	-	Uracil DNA glycosylase superfamily (PF03167)
NCU02547	0	-1.22186	-	-	-	Thioredoxin (PF13462)
NCU08501	0	-1.2181	-	-	ubiquitin-protein transferase activity (GO:0004842)	Domain of unknown function (DUF4414) (PF14377); HECT-domain (ubiquitin-transferase) (PF00632); Domain of Unknown Function (DUF908) (PF06012); Domain of Unknown Function (DUF913) (PF06025)
NCU00004	0	-1.2169	response to stress (GO:0006950)	-	-	Universal stress protein family (PF00582)
NCU04807	-1.22346	-1.21661	response to stress (GO:0006950)	-	-	Universal stress protein family (PF00582)
NCU05990	0	-1.21292	transmembrane transport (GO:0055085)	integral component of membrane (GO:0016021)	-	Major Facilitator Superfamily (PF07690)
NCU05364	0	-1.2115	protein dephosphorylation (GO:0006470)	-	protein tyrosine phosphatase activity (GO:0004725)	Rhodanese-like domain (PF00581); Protein-tyrosine phosphatase (PF00102)
NCU05878	-2.13946	-1.21	-	membrane (GO:0016020)	transferase activity, transferring glycosyl groups (GO:0016757)	Fringe-like (PF02434)
NCU08164	-2.1911	-1.20929	-	-	-	short chain dehydrogenase (PF00106)
NCU07425	-1.35561	-1.20758	-	-	-	-
NCU09097	-1.05393	-1.20419	-	-	-	-
NCU00542	-1.62558	-1.20393	transport (GO:0006810)	integral component of membrane (GO:0016021)	-	Solute carrier family 35 (PF06027)
NCU00559	0	-1.20235	-	-	-	-
NCU08978	0	-1.20181	-	-	-	Protein of unknown function (DUF3074) (PF11274)
NCU07467	0	-1.19972	-	-	-	-
NCU02797	-1.31562	-1.19674	metabolic process (GO:0008152)	-	uridylyltransferase activity (GO:0070569)	UTP--glucose-1-phosphate uridylyltransferase (PF01704)
NCU05565	-1.49292	-1.18448	-	-	-	-
NCU08957	0	-1.18104	-	-	-	-
NCU01973	0	-1.17813	-	-	protein binding (GO:0005515)	JmjC domain, hydroxylase (PF02373); SET domain (PF00856)
NCU06437	0	-1.17444	-	-	metal ion binding (GO:0046872)	Zinc finger, C3HC4 type (RING finger) (PF00097)
NCU09199	0	-1.16434	metabolic process (GO:0008152)	-	oxidoreductase activity (GO:0016491)	Common central domain of tyrosinase (PF00264)
NCU06398	0	-1.16394	-	-	-	-
NCU04370	0	-1.15987	-	-	ubiquitin-like modifier activating enzyme activity (GO:0008641)	Ubiquitin fold domain (PF09358); ThiF family (PF00899); Ubiquitin-activating enzyme E1 FCCH domain (PF16190); Ubiquitin-activating enzyme active site (PF10585); Ubiquitin-activating enzyme E1 four-helix bundle (PF16191)
NCU06976	0	-1.15899	microtubule-based movement (GO:0007018)	dynein complex (GO:0030286)	ATPase activity (GO:0016887); ATP binding (GO:0005524); microtubule motor activity (GO:0003777)	AAA domain (dynein-related subfamily) (PF07728); P-loop containing dynein motor region D3 (PF12775); Dynein heavy chain and region D6 of dynein motor (PF03028); P-loop containing dynein motor region D4 (PF12780); Dynein heavy chain, N-terminal region 2 (PF08393); ATP-binding dynein motor region D5 (PF12781); Dynein heavy chain, N-terminal region 1 (PF08385); Microtubule-binding stalk of dynein mo…
NCU04676	0	-1.15202	-	-	-	Glutathione S-transferase, C-terminal domain (PF14497)
NCU11129	-1.63576	-1.14349	metabolic process (GO:0008152)	-	hydrolase activity (GO:0016787)	Peptidase dimerisation domain (PF07687); Peptidase family M20/M25/M40 (PF01546)
NCU07745	-1.30183	-1.14226	-	-	-	-
NCU16822	0	-1.14102	-	-	-	Peptidase inhibitor I9 (PF05922)
NCU00486	0	-1.13586	-	-	-	-
NCU02606	0	-1.13492	-	-	-	-
NCU00182	0	-1.13347	-	integral component of membrane (GO:0016021)	-	Lung seven transmembrane receptor (PF06814)
NCU02594	1.15196	-1.13308	-	-	-	-
NCU04369	0	-1.12974	-	-	-	-
NCU09252	-1.4652	-1.12632	-	-	-	-
NCU04255	0	-1.1236	-	-	protein binding (GO:0005515)	FHA domain (PF00498)
NCU05846	-1.06728	-1.12313	-	-	-	Protein of unknown function (DUF1479) (PF07350)
NCU02491	0	-1.12264	-	-	-	DnaJ domain (PF00226)
NCU00537	0	-1.11588	-	-	-	-
NCU10529	-1.40636	-1.11415	-	-	-	-
NCU06075	-1.23311	-1.11336	glycolytic process (GO:0006096)	-	potassium ion binding (GO:0030955); pyruvate kinase activity (GO:0004743); magnesium ion binding (GO:0000287)	Pyruvate kinase, barrel domain (PF00224); Pyruvate kinase, alpha/beta domain (PF02887)
NCU04545	-1.41768	-1.11166	-	-	-	-
NCU03248	-1.51862	-1.10682	-	-	-	-
NCU05242	0	-1.10316	transcription, DNA-templated (GO:0006351)	nucleus (GO:0005634)	zinc ion binding (GO:0008270); DNA binding (GO:0003677)	Zinc finger, C2H2 type (PF00096); Fungal specific transcription factor domain (PF04082)
NCU03773	-2.13686	-1.1003	-	-	-	-
NCU09048	-1.21824	-1.08897	-	-	nucleic acid binding (GO:0003676)	RNA recognition motif. (a.k.a. RRM, RBD, or RNP domain) (PF00076); Occluded RNA-recognition motif (PF16842)
NCU03921	-1.11391	-1.08559	mitochondrial respiratory chain complex III assembly (GO:0034551)	-	ATP binding (GO:0005524)	ATPase family associated with various cellular activities (AAA) (PF00004); BCS1 N terminal (PF08740)
NCU01349	0	-1.08439	-	-	-	-
NCU07914	-1.99726	-1.08334	glycolytic process (GO:0006096)	-	phosphoglycerate kinase activity (GO:0004618)	Phosphoglycerate kinase (PF00162)
NCU00100	0	-1.08271	-	-	DNA binding (GO:0003677)	Homeobox domain (PF00046)
NCU01901	-2.24494	-1.07524	lipid metabolic process (GO:0006629)	-	-	Lipase (class 3) (PF01764)
NCU00287	0	-1.07307	-	-	-	Prion-inhibition and propagation (PF14479)
NCU02264	0	-1.06962	-	-	-	Prefoldin subunit (PF02996)
NCU07545	0	-1.06747	regulation of store-operated calcium entry (GO:2001256)	integral component of endoplasmic reticulum membrane (GO:0030176)	-	SOCE-associated regulatory factor of calcium homoeostasis (PF06682)
NCU01200	-1.59547	-1.06464	protein peptidyl-prolyl isomerization (GO:0000413)	-	peptidyl-prolyl cis-trans isomerase activity (GO:0003755)	Cyclophilin type peptidyl-prolyl cis-trans isomerase/CLD (PF00160)
NCU03717	0	-1.06414	translational initiation (GO:0006413)	cytoplasm (GO:0005737)	translation initiation factor activity (GO:0003743); RNA binding (GO:0003723)	Eukaryotic initiation factor 4E (PF01652)
NCU01044	0	-1.06285	-	-	-	Protein of unknown function (DUF3433) (PF11915)
NCU06926	0	-1.05961	-	-	-	-
NCU07277	-2.20826	-1.05115	-	-	-	-
NCU07761	-1.43167	-1.05028	-	-	-	Glycosyltransferase sugar-binding region containing DXD motif (PF04488)
NCU05255	-1.39701	-1.03277	-	-	-	-
NCU02624	-1.47418	-1.02856	oxidation-reduction process (GO:0055114)	-	heme binding (GO:0020037); iron ion binding (GO:0005506); oxidoreductase activity, acting on paired donors, with incorporation or reduction of molecular oxygen (GO:0016705)	Cytochrome P450 (PF00067)
NCU02404	-1.07174	-1.02776	-	-	nucleic acid binding (GO:0003676)	RNA recognition motif. (a.k.a. RRM, RBD, or RNP domain) (PF00076)
NCU08700	0	-1.0217	-	-	-	-
NCU06990	-1.96592	-1.02046	transcription, DNA-templated (GO:0006351); regulation of transcription, DNA-templated (GO:0006355)	nucleus (GO:0005634)	zinc ion binding (GO:0008270); DNA binding (GO:0003677); RNA polymerase II transcription factor activity, sequence-specific DNA binding (GO:0000981)	Fungal Zn(2)-Cys(6) binuclear cluster domain (PF00172); Fungal specific transcription factor domain (PF04082)
NCU02200	-1.14533	-1.01928	-	-	-	CRAL/TRIO domain (PF00650)
NCU04531	0	-1.01751	metabolic process (GO:0008152)	-	catalytic activity (GO:0003824)	Phosphopantetheine attachment site (PF00550); Condensation domain (PF00668); AMP-binding enzyme (PF00501)
NCU07018	0	-1.01655	-	-	-	Histone deacetylase domain (PF00850)
NCU06875	0	-1.01562	-	-	-	Ran-interacting Mog1 protein (PF04603)
NCU06948	0	-1.00639	-	-	calcium ion binding (GO:0005509)	EF-hand domain pair (PF13499)
NCU05012	0	-1.00274	-	-	-	Serine hydrolase (FSH1) (PF03959)
NCU08012	0	-1.00153	exocytosis (GO:0006887)	exocyst (GO:0000145)	-	Exo70 exocyst complex subunit (PF03081)
NCU07232	-4.81542	-1.00135	-	-	-	Hsp20/alpha crystallin family (PF00011)
NCU02203	0	-1.00073	-	-	-	Zinc finger, C3HC4 type (RING finger) (PF13920)
NCU04482	-6.73454	0	-	-	-	Pathogen effector; putative necrosis-inducing factor (PF14856)
NCU11405	-5.92321	0	-	-	hydrolase activity (GO:0016787)	Glycosyl hydrolase family 71 (PF03659)
NCU06413	-5.9192	0	-	-	-	-
NCU00947	-5.20228	0	-	-	-	-
NCU07094	-4.89441	0	-	-	FAD binding (GO:0071949)	FAD binding domain (PF00890); FAD binding domain (PF01494)
NCU07049	-4.82571	0	-	-	-	-
NCU05639	-4.37352	0	-	-	-	-
NCU05133	-4.23783	0	-	-	coenzyme binding (GO:0050662); catalytic activity (GO:0003824)	NAD dependent epimerase/dehydratase family (PF01370)
NCU00990	-4.08542	0	-	-	-	BNR repeat-containing family member (PF15892)
NCU02856	-3.96079	0	-	-	-	-
NCU07226	-3.89398	0	-	-	-	-
NCU05134	-3.74237	0	-	-	-	-
NCU06575	-3.69802	0	-	-	-	-
NCU07787	-3.61787	0	-	-	-	Cerato-platanin (PF07249)
NCU07485	-3.57002	0	-	-	-	-
NCU05068	-3.49686	0	response to stress (GO:0006950)	integral component of membrane (GO:0016021)	-	RTA1 like protein (PF04479)
NCU04603	-3.42795	0	-	-	-	-
NCU03213	-3.41706	0	-	-	-	LicD family (PF04991)
NCU12040	-3.39803	0	-	-	-	-
NCU08412	-3.35402	0	carbohydrate metabolic process (GO:0005975)	-	hydrolase activity, hydrolyzing O-glycosyl compounds (GO:0004553)	Cellulase (glycosyl hydrolase family 5) (PF00150)
NCU08805	-3.34398	0	-	-	-	-
NCU04948	-3.33998	0	-	-	-	CFEM domain (PF05730)
NCU01355	-3.33136	0	-	-	-	-
NCU07449	-3.31629	0	-	-	-	-
NCU00985	-3.29615	0	carbohydrate metabolic process (GO:0005975)	-	hydrolase activity, hydrolyzing O-glycosyl compounds (GO:0004553)	Glycosyl hydrolases family 2, sugar binding domain (PF02837); Glycosyl hydrolases family 2, TIM barrel domain (PF02836); Glycosyl hydrolases family 2 (PF00703)
NCU02278	-3.29028	0	oxidation-reduction process (GO:0055114)	-	oxidoreductase activity (GO:0016491)	Ferric reductase NAD binding domain (PF08030); Ferric reductase like transmembrane component (PF01794)
NCU09773	-3.2677	0	transmembrane transport (GO:0055085)	-	-	OPT oligopeptide transporter protein (PF03169)
NCU00607	-3.25114	0	-	-	-	-
NCU01620	-3.20314	0	-	-	-	-
NCU16917	-3.1818	0	-	-	-	-
NCU17138	-3.17721	0	-	-	-	Haloacid dehalogenase-like hydrolase (PF13419)
NCU00355	-3.16757	0	oxidation-reduction process (GO:0055114)	-	heme binding (GO:0020037); catalase activity (GO:0004096)	Catalase (PF00199); Catalase-related immune-responsive (PF06628)
NCU04419	-3.11166	0	oxidation-reduction process (GO:0055114)	-	oxidoreductase activity (GO:0016491)	2OG-Fe(II) oxygenase superfamily (PF03171); non-haem dioxygenase in morphine synthesis N-terminal (PF14226)
NCU06412	-3.10189	0	-	-	-	-
NCU04522	-3.07054	0	-	-	-	Protein of unknown function (DUF1349) (PF07081)
NCU08114	-3.05177	0	transmembrane transport (GO:0055085)	integral component of membrane (GO:0016021)	transmembrane transporter activity (GO:0022857)	Sugar (and other) transporter (PF00083)
NCU07222	-3.0514	0	-	-	-	-
NCU04998	-3.02399	0	-	-	-	-
NCU05036	-3.01962	0	-	-	-	-
NCU09424	-3.01833	0	-	-	-	Right handed beta helix region (PF13229)
NCU01374	-2.99851	0	copper ion homeostasis (GO:0055070)	-	copper ion binding (GO:0005507)	CutC family (PF03932)
NCU01906	-2.95522	0	-	-	-	Aldo/keto reductase family (PF00248)
NCU09406	-2.87185	0	amine metabolic process (GO:0009308); oxidation-reduction process (GO:0055114)	-	quinone binding (GO:0048038); primary amine oxidase activity (GO:0008131); copper ion binding (GO:0005507)	Domain of unknown function (DUF1965) (PF09248); Copper amine oxidase, enzyme domain (PF01179)
NCU09641	-2.86942	0	transcription, DNA-templated (GO:0006351)	nucleus (GO:0005634)	zinc ion binding (GO:0008270); DNA binding (GO:0003677)	Fungal specific transcription factor domain (PF04082)
NCU16805	-2.83364	0	-	-	-	-
NCU09170	-2.81786	0	carbohydrate metabolic process (GO:0005975); L-arabinose metabolic process (GO:0046373)	-	hydrolase activity, hydrolyzing O-glycosyl compounds (GO:0004553); alpha-L-arabinofuranosidase activity (GO:0046556)	Glycosyl hydrolases family 43 (PF04616); Alpha-L-arabinofuranosidase B (ABFB) domain (PF05270)
NCU09043	-2.77259	0	-	-	-	Caleosin related protein (PF05042)
NCU02125	-2.76109	0	-	-	hydrolase activity (GO:0016787)	NUDIX domain (PF00293)
NCU03086	-2.75581	0	-	-	catalytic activity (GO:0003824)	HpcH/HpaI aldolase/citrate lyase family (PF03328)
NCU02904	-2.75512	0	-	-	-	alpha/beta hydrolase fold (PF00561)
NCU06937	-2.74352	0	-	-	-	Pathogen effector; putative necrosis-inducing factor (PF14856)
NCU07596	-2.7405	0	-	-	-	-
NCU05132	-2.71814	0	-	-	-	Glycosyl transferases group 1 (PF00534)
NCU01593	-2.71475	0	-	-	-	Heterokaryon incompatibility protein (HET) (PF06985)
NCU09909	-2.66692	0	transport (GO:0006810); transmembrane transport (GO:0055085)	membrane (GO:0016020)	transporter activity (GO:0005215)	Sodium:solute symporter family (PF00474)
NCU02798	-2.65157	0	folic acid-containing compound metabolic process (GO:0006760)	-	dihydroneopterin aldolase activity (GO:0004150)	Dihydroneopterin aldolase (PF02152)
NCU05395	-2.64682	0	-	-	-	-
NCU04490	-2.61969	0	-	-	-	-
NCU03928	-2.61941	0	potassium ion transmembrane transport (GO:0071805)	integral component of plasma membrane (GO:0005887)	potassium ion transmembrane transporter activity (GO:0015079)	Fungal potassium channel (PF16944)
NCU04343	-2.60413	0	-	-	-	Histidine-specific methyltransferase, SAM-dependent (PF10017); Sulfatase-modifying factor enzyme 1 (PF03781)
NCU07218	-2.60391	0	-	-	-	-
NCU10684	-2.582	0	-	-	-	-
NCU00871	-2.54039	0	-	-	-	-
NCU06143	-2.53691	0	-	-	-	Glycosyl hydrolase family 115 (PF15979)
NCU00143	-2.51713	0	-	-	-	-
NCU02251	-2.50334	0	-	-	-	-
NCU05159	-2.47674	0	metabolic process (GO:0008152); carbohydrate metabolic process (GO:0005975)	extracellular region (GO:0005576)	hydrolase activity (GO:0016787); cellulose binding (GO:0030248)	Fungal cellulose binding domain (PF00734); Cutinase (PF01083)
NCU04778	-2.47459	0	-	-	zinc ion binding (GO:0008270); carbonate dehydratase activity (GO:0004089)	Carbonic anhydrase (PF00484)
NCU05508	-2.47445	0	-	-	-	-
NCU08183	-2.47227	0	metabolic process (GO:0008152)	-	methyltransferase activity (GO:0008168)	Methyltransferase domain (PF08241)
NCU02883	-2.4647	0	-	-	-	-
NCU01735	-2.44488	0	ion transport (GO:0006811)	membrane (GO:0016020)	ion channel activity (GO:0005216)	Bacteriorhodopsin-like protein (PF01036)
NCU00144	-2.44467	0	-	-	protein dimerization activity (GO:0046983)	Helix-loop-helix DNA-binding domain (PF00010)
NCU09957	-2.444	0	-	-	-	-
NCU16720	-2.4402	0	-	-	-	Heterokaryon incompatibility protein (HET) (PF06985)
NCU09345	-2.4289	0	-	-	-	NMT1/THI5 like (PF09084)
NCU08191	-2.42189	0	-	-	-	-
NCU05663	-2.4208	0	-	-	-	-
NCU10732	-2.41341	0	-	-	-	Mitochondrial carrier protein (PF00153)
NCU08454	-2.40713	0	-	-	-	-
NCU17284	-2.40326	0	-	-	-	Glycosyl hydrolases family 32 C terminal (PF08244); Glycosyl hydrolases family 32 N-terminal domain (PF00251)
NCU03484	-2.39877	0	-	-	-	Heterokaryon incompatibility protein (HET) (PF06985)
NCU09491	-2.39444	0	-	extracellular region (GO:0005576)	hydrolase activity (GO:0016787)	Esterase PHB depolymerase (PF10503)
NCU05135	-2.38208	0	-	-	-	Spherulation-specific family 4 (PF12138)
NCU09335	-2.3713	0	-	-	-	-
NCU02092	-2.35853	0	-	-	-	-
NCU06120	-2.34128	0	-	-	-	Domain of unknown function (DUF1772) (PF08592)
NCU04630	-2.33714	0	-	-	-	-
NCU02876	-2.32706	0	-	-	-	-
NCU05063	-2.32383	0	-	-	-	Glycosyl Hydrolase Family 88 (PF07470)
NCU02882	-2.30538	0	-	-	-	-
NCU08189	-2.29308	0	carbohydrate metabolic process (GO:0005975)	-	hydrolase activity, hydrolyzing O-glycosyl compounds (GO:0004553)	Glycosyl hydrolase family 10 (PF00331)
NCU09719	-2.28256	0	-	-	-	-
NCU09717	-2.25562	0	-	-	-	-
NCU08274	-2.25317	0	-	-	-	-
NCU07385	-2.2371	0	-	-	-	-
NCU05624	-2.22713	0	-	-	hydrolase activity (GO:0016787)	Asparaginase (PF01112)
NCU08432	-2.20093	0	-	-	-	Cytochrome domain of cellobiose dehydrogenase (PF16010)
NCU02328	-2.18816	0	-	-	O-methyltransferase activity (GO:0008171)	O-methyltransferase (PF00891)
NCU05828	-2.15528	0	-	-	-	Amidohydrolase family (PF07969)
NCU05625	-2.14806	0	-	-	-	Domain of unknown function (DUF4185) (PF13810)
NCU07123	-2.14768	0	-	-	-	-
NCU07959	-2.14743	0	-	-	acid phosphatase activity (GO:0003993)	Histidine phosphatase superfamily (branch 2) (PF00328)
NCU10387	-2.14624	0	oxidation-reduction process (GO:0055114)	-	flavin adenine dinucleotide binding (GO:0050660); NADP binding (GO:0050661); N,N-dimethylaniline monooxygenase activity (GO:0004499)	Flavin-binding monooxygenase-like (PF00743)
NCU05170	-2.1333	0	-	-	-	-
NCU07340	-2.13305	0	carbohydrate metabolic process (GO:0005975)	extracellular region (GO:0005576)	hydrolase activity, hydrolyzing O-glycosyl compounds (GO:0004553); cellulose binding (GO:0030248)	Fungal cellulose binding domain (PF00734); Glycosyl hydrolase family 7 (PF00840)
NCU11417	-2.12809	0	-	-	coenzyme binding (GO:0050662); catalytic activity (GO:0003824)	NAD dependent epimerase/dehydratase family (PF01370)
NCU05384	-2.1227	0	-	-	-	Uncharacterized protein conserved in bacteria (DUF2236) (PF09995)
NCU01211	-2.11714	0	-	-	-	T5orf172 domain (PF10544)
NCU08055	-2.10588	0	regulation of transcription, DNA-templated (GO:0006355)	-	DNA-binding transcription factor activity (GO:0003700)	Basic region leucine zipper (PF07716)
NCU06532	-2.08928	0	oxidation-reduction process (GO:0055114)	cytoplasm (GO:0005737)	oxidoreductase activity, acting on the CH-CH group of donors (GO:0016627)	Dihydroorotate dehydrogenase (PF01180)
NCU08764	-2.07487	0	-	-	-	-
NCU05833	-2.06285	0	transmembrane transport (GO:0055085); metal ion transport (GO:0030001)	membrane (GO:0016020)	metal ion transmembrane transporter activity (GO:0046873)	CorA-like Mg2+ transporter protein (PF01544); Ankyrin repeats (3 copies) (PF12796)
NCU05154	-2.05653	0	-	-	-	Cation transporting ATPase, C-terminus (PF00689); Cation transport ATPase (P-type) (PF13246); Cation transporter/ATPase, N-terminus (PF00690); E1-E2 ATPase (PF00122); haloacid dehalogenase-like hydrolase (PF08282)
NCU05162	-2.05622	0	-	-	-	Phosphotransferase enzyme family (PF01636)
NCU11253	-2.05284	0	-	-	-	-
NCU03388	-2.04356	0	-	-	-	SPFH domain / Band 7 family (PF01145)
NCU01451	-2.03213	0	-	-	-	-
NCU09874	-2.02768	0	transmembrane transport (GO:0055085)	-	-	OPT oligopeptide transporter protein (PF03169)
NCU00992	-2.02643	0	-	-	-	-
NCU09713	-2.01397	0	-	-	-	-
NCU08384	-1.99116	0	-	-	-	Aldo/keto reductase family (PF00248)
NCU04265	-1.99027	0	-	-	-	Glycosyl hydrolases family 32 C terminal (PF08244); Glycosyl hydrolases family 32 N-terminal domain (PF00251)
NCU00876	-1.97554	0	oxidation-reduction process (GO:0055114)	-	oxidoreductase activity (GO:0016491)	FAD-binding domain (PF08022); Ferric reductase like transmembrane component (PF01794)
NCU11211	-1.9694	0	-	-	-	Heterokaryon incompatibility protein (HET) (PF06985)
NCU00873	-1.95944	0	-	-	-	Fructosamine kinase (PF03881)
NCU07468	-1.95356	0	-	-	coenzyme binding (GO:0050662); catalytic activity (GO:0003824)	NAD dependent epimerase/dehydratase family (PF01370)
NCU07205	-1.93889	0	transmembrane transport (GO:0055085)	integral component of membrane (GO:0016021)	-	Major Facilitator Superfamily (PF07690)
NCU05638	-1.91527	0	protein phosphorylation (GO:0006468)	-	ATP binding (GO:0005524); protein kinase activity (GO:0004672)	Protein kinase domain (PF00069)
NCU03922	-1.90186	0	isoprenoid biosynthetic process (GO:0008299)	-	hydroxymethylglutaryl-CoA synthase activity (GO:0004421)	Hydroxymethylglutaryl-coenzyme A synthase C terminal (PF08540); Hydroxymethylglutaryl-coenzyme A synthase N terminal (PF01154)
NCU17055	-1.90077	0	-	-	-	-
NCU09291	-1.90053	0	oxidation-reduction process (GO:0055114)	-	thiol oxidase activity (GO:0016972)	Erv1 / Alr family (PF04777)
NCU05840	-1.89374	0	-	-	-	Heterokaryon incompatibility protein (HET) (PF06985)
NCU16699	-1.89315	0	phosphatidylinositol metabolic process (GO:0046488)	-	phosphatidylinositol phosphate kinase activity (GO:0016307)	Phosphatidylinositol-4-phosphate 5-Kinase (PF01504)
NCU07931	-1.88685	0	metabolic process (GO:0008152); oxidation-reduction process (GO:0055114)	-	oxidoreductase activity, acting on the CH-OH group of donors, NAD or NADP as acceptor (GO:0016616); NAD binding (GO:0051287)	D-isomer specific 2-hydroxyacid dehydrogenase, catalytic domain (PF00389); D-isomer specific 2-hydroxyacid dehydrogenase, NAD binding domain (PF02826)
NCU08954	-1.88572	0	-	-	-	YCII-related domain (PF03795)
NCU02852	-1.88161	0	oxidation-reduction process (GO:0055114)	-	heme binding (GO:0020037); iron ion binding (GO:0005506); oxidoreductase activity, acting on paired donors, with incorporation or reduction of molecular oxygen (GO:0016705)	Cytochrome P450 (PF00067)
NCU03732	-1.87113	0	-	-	-	DnaJ C terminal domain (PF01556); DnaJ domain (PF00226)
NCU02191	-1.87047	0	-	-	-	-
NCU06301	-1.86419	0	metabolic process (GO:0008152)	-	carbon-sulfur lyase activity (GO:0016846)	Glutathione-dependent formaldehyde-activating enzyme (PF04828)
NCU02027	-1.86317	0	-	-	hydrolase activity (GO:0016787)	Phospholipase/Carboxylesterase (PF02230)
NCU02209	-1.85631	0	lipid metabolic process (GO:0006629)	-	-	Fatty acid desaturase (PF00487)
NCU04193	-1.85492	0	-	-	-	Peptidase M50B-like (PF13398)
NCU06531	-1.85309	0	-	-	-	-
NCU02884	-1.8496	0	-	-	-	-
NCU04382	-1.8457	0	-	-	-	Transglutaminase-like superfamily (PF01841)
NCU09273	-1.83807	0	oxidation-reduction process (GO:0055114)	-	oxidoreductase activity (GO:0016491); flavin adenine dinucleotide binding (GO:0050660)	FAD binding domain (PF01565)
NCU07454	-1.83408	0	-	-	-	CFEM domain (PF05730)
NCU02244	-1.81619	0	-	-	-	C2 domain (PF00168)
NCU02188	-1.81316	0	transmembrane transport (GO:0055085)	integral component of membrane (GO:0016021)	transmembrane transporter activity (GO:0022857)	Sugar (and other) transporter (PF00083)
NCU12084	-1.81174	0	-	-	-	-
NCU03322	-1.80061	0	-	-	-	GDSL-like Lipase/Acylhydrolase family (PF13472)
NCU08199	-1.79791	0	oxidation-reduction process (GO:0055114)	-	oxidoreductase activity (GO:0016491); flavin adenine dinucleotide binding (GO:0050660)	Berberine and berberine like (PF08031); FAD binding domain (PF01565)
NCU04042	-1.79744	0	-	-	catalytic activity (GO:0003824)	Flavoprotein (PF02441)
NCU00801	-1.79485	0	transmembrane transport (GO:0055085)	integral component of membrane (GO:0016021)	transmembrane transporter activity (GO:0022857)	Sugar (and other) transporter (PF00083)
NCU02761	-1.79373	0	-	-	-	-
NCU05826	-1.78558	0	-	-	-	-
NCU03699	-1.78495	0	-	-	-	-
NCU06981	-1.77787	0	-	-	-	WSC domain (PF01822)
NCU05929	-1.77745	0	-	-	GTP binding (GO:0005525)	50S ribosome-binding GTPase (PF01926)
NCU01136	-1.77656	0	-	-	-	-
NCU06132	-1.77596	0	transmembrane transport (GO:0055085)	integral component of membrane (GO:0016021)	-	Major Facilitator Superfamily (PF07690)
NCU09422	-1.76763	0	-	-	-	-
NCU00285	-1.75429	0	-	-	-	-
NCU08664	-1.75061	0	-	-	-	-
NCU09355	-1.747	0	-	-	-	-
NCU01504	-1.74203	0	calcium-mediated signaling (GO:0019722)	-	-	Calcipressin (PF04847)
NCU05061	-1.74165	0	-	-	-	-
NCU00545	-1.73334	0	-	-	-	-
NCU10045	-1.73069	0	cell wall modification (GO:0042545)	cell wall (GO:0005618)	pectinesterase activity (GO:0030599)	Pectinesterase (PF01095)
NCU16555	-1.72095	0	-	-	-	-
NCU03281	-1.71801	0	copper ion transmembrane transport (GO:0035434)	integral component of membrane (GO:0016021)	copper ion transmembrane transporter activity (GO:0005375)	Ctr copper transporter family (PF04145)
NCU06207	-1.71324	0	lipid biosynthetic process (GO:0008610); oxidation-reduction process (GO:0055114)	-	oxidoreductase activity (GO:0016491); iron ion binding (GO:0005506)	Fatty acid hydroxylase superfamily (PF04116)
NCU03607	-1.71201	0	-	-	-	Pyridoxal-phosphate dependent enzyme (PF00291)
NCU04352	-1.711	0	-	myosin complex (GO:0016459)	motor activity (GO:0003774); ATP binding (GO:0005524)	Cytochrome b5-like Heme/Steroid binding domain (PF00173); DEK C terminal domain (PF08766); Myosin head (motor domain) (PF00063); Chitin synthase (PF03142)
NCU11406	-1.70554	0	-	-	molybdenum ion binding (GO:0030151); catalytic activity (GO:0003824); pyridoxal phosphate binding (GO:0030170)	MOSC N-terminal beta barrel domain (PF03476); MOSC domain (PF03473)
NCU06348	-1.70514	0	phosphatidylinositol phosphorylation (GO:0046854)	-	-	Inositol monophosphatase family (PF00459)
NCU01107	-1.70196	0	-	-	-	short chain dehydrogenase (PF00106)
NCU00899	-1.69775	0	-	-	-	-
NCU05356	-1.69675	0	-	-	-	-
NCU03803	-1.69452	0	-	-	-	Enoyl-(Acyl carrier protein) reductase (PF13561)
NCU05299	-1.69419	0	respiratory electron transport chain (GO:0022904)	mitochondrial inner membrane (GO:0005743)	oxidoreductase activity, acting on NAD(P)H (GO:0016651)	ETC complex I subunit conserved region (PF04716)
NCU08332	-1.69413	0	positive regulation of translational elongation (GO:0045901); positive regulation of translational termination (GO:0045905); translational frameshifting (GO:0006452)	-	ribosome binding (GO:0043022); translation elongation factor activity (GO:0003746); RNA binding (GO:0003723)	Eukaryotic elongation factor 5A hypusine, DNA-binding OB fold (PF01287)
NCU04949	-1.69411	0	-	-	-	-
NCU01704	-1.69397	0	-	-	oxidoreductase activity (GO:0016491)	Oxidoreductase family, NAD-binding Rossmann fold (PF01408)
NCU02783	-1.6928	0	transport (GO:0006810); transmembrane transport (GO:0055085)	membrane (GO:0016020)	-	Amino acid permease (PF00324)
NCU09663	-1.69047	0	metabolic process (GO:0008152)	-	hydrolase activity (GO:0016787)	Cutinase (PF01083)
NCU01546	-1.68484	0	porphyrin-containing compound biosynthetic process (GO:0006779); oxidation-reduction process (GO:0055114)	-	coproporphyrinogen oxidase activity (GO:0004109)	Coproporphyrinogen III oxidase (PF01218)
NCU02775	-1.67677	0	-	-	-	Velvet factor (PF11754)
NCU04591	-1.67229	0	-	-	FAD binding (GO:0071949)	FAD binding domain (PF01494)
NCU04589	-1.67073	0	-	-	-	Heterokaryon incompatibility protein (HET) (PF06985)
NCU16856	-1.67064	0	-	-	-	-
NCU00350	-1.66362	0	-	-	-	Alpha/beta hydrolase family (PF12697)
NCU08053	-1.66031	0	-	intracellular (GO:0005622)	actin binding (GO:0003779)	Cofilin/tropomyosin-type actin-binding protein (PF00241)
NCU09429	-1.64934	0	oxidation-reduction process (GO:0055114)	-	oxidoreductase activity (GO:0016491)	Pyridine nucleotide-disulphide oxidoreductase (PF07992)
NCU05165	-1.64437	0	-	-	-	Pyridoxamine 5'-phosphate oxidase (PF01243)
NCU05606	-1.64338	0	-	-	-	Glucosidase II beta subunit-like protein (PF13015); Glucosidase II beta subunit-like (PF12999)
NCU04130	-1.64334	0	glutathione catabolic process (GO:0006751)	-	glutathione hydrolase activity (GO:0036374)	Gamma-glutamyltranspeptidase (PF01019)
NCU02187	-1.64309	0	-	-	-	-
NCU00260	-1.63897	0	oxidation-reduction process (GO:0055114)	-	-	Zinc-binding dehydrogenase (PF00107); Alcohol dehydrogenase GroES-like domain (PF08240)
NCU00172	-1.63449	0	-	-	-	Docking domain of Afi1 for Arf3 in vesicle trafficking (PF07792); Stabilization of polarity axis (PF08616)
NCU05637	-1.62325	0	-	-	-	-
NCU04467	-1.62228	0	-	-	-	-
NCU00965	-1.61926	0	signal peptide processing (GO:0006465)	integral component of membrane (GO:0016021); signal peptidase complex (GO:0005787)	peptidase activity (GO:0008233)	Microsomal signal peptidase 25 kDa subunit (SPC25) (PF06703)
NCU01467	-1.61353	0	-	-	-	-
NCU02671	-1.61027	0	-	-	-	Zinc finger, C2H2 type (PF00096)
NCU08190	-1.60726	0	-	-	-	Lanthionine synthetase C-like protein (PF05147)
NCU00403	-1.60522	0	-	-	-	GDP-mannose 4,6 dehydratase (PF16363)
NCU05881	-1.60003	0	-	-	-	Las17-binding protein actin regulator (PF04366)
NCU08282	-1.59966	0	-	-	-	-
NCU04554	-1.59634	0	carbohydrate metabolic process (GO:0005975)	-	-	Glycosyl hydrolases family 18 (PF00704)
NCU06430	-1.59228	0	-	-	-	Glycosyl transferase family 90 (PF05686)
NCU05266	-1.5916	0	-	-	RNA binding (GO:0003723)	KH domain (PF00013)
NCU08173	-1.5871	0	-	-	FAD binding (GO:0071949)	FAD binding domain (PF01494)
NCU04816	-1.58573	0	-	-	-	-
NCU01414	-1.57802	0	-	-	-	-
NCU02302	-1.57531	0	phospholipid biosynthetic process (GO:0008654)	-	phosphatidylserine decarboxylase activity (GO:0004609)	Phophatidylserine decarboxylase (PF12588); Phosphatidylserine decarboxylase (PF02666)
NCU06315	-1.57258	0	-	-	inositol-1,4,5-trisphosphate 3-kinase activity (GO:0008440)	Inositol polyphosphate kinase (PF03770)
NCU08045	-1.57069	0	-	-	-	Phospholipid methyltransferase (PF04191)
NCU08174	-1.57011	0	-	-	-	Clr5 domain (PF14420)
NCU08378	-1.56912	0	protein deubiquitination (GO:0016579)	-	thiol-dependent ubiquitinyl hydrolase activity (GO:0036459)	Ubiquitin carboxyl-terminal hydrolase (PF00443)
NCU07491	-1.56124	0	-	plasma membrane (GO:0005886)	-	SUR7/PalI family (PF06687)
NCU08475	-1.5592	0	-	-	-	-
NCU04546	-1.55069	0	-	-	-	-
NCU02220	-1.55023	0	-	-	protein disulfide oxidoreductase activity (GO:0015035)	DSBA-like thioredoxin domain (PF01323)
NCU07169	-1.54809	0	transmembrane transport (GO:0055085)	integral component of membrane (GO:0016021)	transmembrane transporter activity (GO:0022857)	Sugar (and other) transporter (PF00083)
NCU01826	-1.54737	0	-	-	-	Triose-phosphate Transporter family (PF03151)
NCU00278	-1.54673	0	-	membrane (GO:0016020)	electron transfer activity (GO:0009055); NADH dehydrogenase (ubiquinone) activity (GO:0008137)	NADH ubiquinone oxidoreductase subunit NDUFA12 (PF05071)
NCU08407	-1.54454	0	transmembrane transport (GO:0055085)	integral component of membrane (GO:0016021)	-	Major Facilitator Superfamily (PF07690)
NCU08762	-1.54392	0	-	membrane (GO:0016020)	-	Ergosterol biosynthesis ERG4/ERG24 family (PF01222)
NCU01769	-1.54141	0	-	-	-	-
NCU04479	-1.5407	0	-	-	-	Peptidase family M28 (PF04389)
NCU00870	-1.53956	0	-	-	protein binding (GO:0005515)	SET domain (PF00856)
NCU03240	-1.53766	0	-	-	-	Glycosyl transferase family group 2 (PF13632)
NCU05628	-1.53569	0	-	-	-	-
NCU01903	-1.53292	0	-	-	-	Alpha/beta hydrolase of unknown function (DUF1100) (PF06500)
NCU04403	-1.52769	0	-	-	ubiquitin binding (GO:0043130); protein binding (GO:0005515)	Ubiquitin-binding domain (PF16455); Ubiquitin family (PF00240)
NCU04912	-1.52725	0	-	-	-	Heterokaryon incompatibility protein (HET) (PF06985)
NCU07167	-1.52193	0	-	-	-	NmrA-like family (PF05368)
NCU06137	-1.52182	0	oxidation-reduction process (GO:0055114)	-	heme binding (GO:0020037); iron ion binding (GO:0005506); oxidoreductase activity, acting on paired donors, with incorporation or reduction of molecular oxygen (GO:0016705)	Cytochrome P450 (PF00067)
NCU07293	-1.51549	0	regulation of cyclin-dependent protein serine/threonine kinase activity (GO:0000079)	-	protein kinase binding (GO:0019901)	Cyclin (PF08613)
NCU08300	-1.51132	0	-	-	-	-
NCU06386	-1.5113	0	-	-	-	Glycosyl transferase family 2 (PF00535)
NCU09534	-1.50952	0	response to oxidative stress (GO:0006979); oxidation-reduction process (GO:0055114)	-	glutathione peroxidase activity (GO:0004602)	Glutathione peroxidase (PF00255)
NCU07807	-1.49619	0	carbohydrate metabolic process (GO:0005975)	-	zinc ion binding (GO:0008270); aldehyde-lyase activity (GO:0016832)	Fructose-bisphosphate aldolase class-II (PF01116)
NCU11236	-1.48948	0	-	-	-	-
NCU04904	-1.48901	0	-	-	-	Methyltransferase domain (PF13489)
NCU05897	-1.48453	0	transmembrane transport (GO:0055085)	integral component of membrane (GO:0016021)	-	Major Facilitator Superfamily (PF07690)
NCU03255	-1.48232	0	-	-	acid phosphatase activity (GO:0003993)	Histidine phosphatase superfamily (branch 2) (PF00328)
NCU01905	-1.47869	0	oxidation-reduction process (GO:0055114)	-	-	Zinc-binding dehydrogenase (PF00107); Alcohol dehydrogenase GroES-like domain (PF08240)
NCU10721	-1.4774	0	transmembrane transport (GO:0055085)	-	-	UAA transporter family (PF08449)
NCU00749	-1.47649	0	-	-	protein dimerization activity (GO:0046983)	Helix-loop-helix DNA-binding domain (PF00010)
NCU03313	-1.47308	0	-	-	-	Protein of unknown function (DUF3237) (PF11578)
NCU09042	-1.47185	0	carbohydrate metabolic process (GO:0005975)	-	hydrolase activity, hydrolyzing O-glycosyl compounds (GO:0004553)	Glycosyl hydrolases family 2 (PF00703)
NCU04045	-1.47041	0	peroxisome fission (GO:0016559)	integral component of peroxisomal membrane (GO:0005779)	-	Peroxisomal biogenesis factor 11 (PEX11) (PF05648)
NCU02219	-1.46816	0	cell morphogenesis involved in conjugation with cellular fusion (GO:0000753)	membrane (GO:0016020)	-	Ca2+ regulator and membrane fusion protein Fig1 (PF12351)
NCU01659	-1.46563	0	-	-	-	uDENN domain (PF03456); DENN (AEX-3) domain (PF02141); dDENN domain (PF03455)
NCU15832	-1.4632	0	-	-	-	-
NCU00793	-1.46265	0	trehalose biosynthetic process (GO:0005992)	-	catalytic activity (GO:0003824)	Glycosyltransferase family 20 (PF00982); Trehalose-phosphatase (PF02358)
NCU03569	-1.46254	0	-	-	-	-
NCU02252	-1.46216	0	glucose catabolic process (GO:0006007)	cytoplasm (GO:0005737)	metal ion binding (GO:0046872); manganese ion binding (GO:0030145); phosphoglycerate mutase activity (GO:0004619); catalytic activity (GO:0003824)	BPG-independent PGAM N-terminus (iPGM_N) (PF06415); Metalloenzyme superfamily (PF01676)
NCU05873	-1.46172	0	carbohydrate metabolic process (GO:0005975)	-	catalytic activity (GO:0003824)	Alpha amylase, catalytic domain (PF00128)
NCU10468	-1.45828	0	arginine biosynthetic process (GO:0006526)	-	glutamate N-acetyltransferase activity (GO:0004358)	ArgJ family (PF01960)
NCU04262	-1.45688	0	-	-	-	Glycosyl hydrolase family 76 (PF03663)
NCU07818	-1.45463	0	-	-	O-methyltransferase activity (GO:0008171)	O-methyltransferase (PF00891)
NCU09460	-1.45418	0	-	mitochondrion (GO:0005739)	NADH dehydrogenase activity (GO:0003954); NADH dehydrogenase (ubiquinone) activity (GO:0008137)	NADH-ubiquinone oxidoreductase ASHI subunit (CI-ASHI or NDUFB8) (PF05821)
NCU07915	-1.45016	0	-	integral component of membrane (GO:0016021)	-	Mpv17 / PMP22 family (PF04117)
NCU16460	-1.44323	0	-	-	-	-
NCU03492	-1.44297	0	lipid biosynthetic process (GO:0008610); oxidation-reduction process (GO:0055114)	-	oxidoreductase activity (GO:0016491); iron ion binding (GO:0005506)	Cytochrome b5-like Heme/Steroid binding domain (PF00173); Fatty acid hydroxylase superfamily (PF04116)
NCU05716	-1.44224	0	-	-	-	UBA-like domain (PF14555); Cullin binding (PF03556)
NCU11237	-1.44095	0	-	-	-	PRA1 family protein (PF03208)
NCU03184	-1.43945	0	-	-	-	Zinc finger, C2H2 type (PF00096)
NCU01477	-1.43832	0	-	-	-	-
NCU04373	-1.43559	0	-	-	-	-
NCU03593	-1.43393	0	-	-	DNA binding (GO:0003677)	Homeobox domain (PF00046)
NCU02090	-1.4337	0	nucleoside metabolic process (GO:0009116)	-	-	Phosphoribosyl transferase domain (PF00156)
NCU06940	-1.42597	0	-	-	-	-
NCU06211	-1.42229	0	oxidation-reduction process (GO:0055114)	-	oxidoreductase activity (GO:0016491); oxidoreductase activity, acting on the CH-OH group of donors, NAD or NADP as acceptor (GO:0016616)	lactate/malate dehydrogenase, alpha/beta C-terminal domain (PF02866); lactate/malate dehydrogenase, NAD binding domain (PF00056)
NCU00915	-1.42197	0	tRNA aminoacylation for protein translation (GO:0006418)	-	aminoacyl-tRNA ligase activity (GO:0004812); nucleotide binding (GO:0000166); nucleic acid binding (GO:0003676); ATP binding (GO:0005524)	tRNA synthetases class II (D, K and N) (PF00152); OB-fold nucleic acid binding domain (PF01336)
NCU05221	-1.42052	0	electron transport chain (GO:0022900)	-	oxidoreductase activity, acting on NAD(P)H (GO:0016651)	ETC complex I subunit conserved region (PF04800)
NCU01648	-1.41836	0	protein O-linked glycosylation (GO:0006493)	membrane (GO:0016020)	mannosyltransferase activity (GO:0000030)	MIR domain (PF02815); Dolichyl-phosphate-mannose-protein mannosyltransferase (PF02366); C-terminal four TMM region of protein-O-mannosyltransferase (PF16192)
NCU07280	-1.41789	0	protein phosphorylation (GO:0006468)	-	ATP binding (GO:0005524); protein serine/threonine kinase activity (GO:0004674); protein kinase activity (GO:0004672)	Haspin like kinase domain (PF12330); Protein kinase domain (PF00069); Protein kinase C terminal domain (PF00433)
NCU02534	-1.41651	0	oxidation-reduction process (GO:0055114)	-	quinone binding (GO:0048038); oxidoreductase activity, acting on NAD(P)H (GO:0016651); NAD binding (GO:0051287)	Respiratory-chain NADH dehydrogenase, 49 Kd subunit (PF00346)
NCU02597	-1.41356	0	-	-	hydrolase activity (GO:0016787)	Amidohydrolase family (PF01979)
NCU00241	-1.41078	0	-	-	-	-
NCU06312	-1.40831	0	-	-	-	G protein-coupled glucose receptor regulating Gpa2 (PF11710); G protein-coupled glucose receptor regulating Gpa2 C-term (PF11970)
NCU04293	-1.40304	0	-	-	-	Endoplasmic Reticulum-Golgi Intermediate Compartment (ERGIC) (PF13850); Endoplasmic reticulum vesicle transporter (PF07970)
NCU01587	-1.40209	0	-	intracellular (GO:0005622)	actin binding (GO:0003779)	Cofilin/tropomyosin-type actin-binding protein (PF00241)
NCU04951	-1.4016	0	-	-	-	-
NCU01904	-1.40127	0	-	-	-	Enoyl-(Acyl carrier protein) reductase (PF13561)
NCU08601	-1.40122	0	-	-	-	Heterokaryon incompatibility protein (HET) (PF06985)
NCU09958	-1.39868	0	-	-	protein binding (GO:0005515)	Ankyrin repeats (many copies) (PF13637); Ankyrin repeat (PF13606)
NCU06881	-1.39603	0	metabolic process (GO:0008152)	-	CoA-transferase activity (GO:0008410)	Coenzyme A transferase (PF01144)
NCU02571	-1.3959	0	metabolic process (GO:0008152)	-	transferase activity, transferring acyl groups other than amino-acyl groups (GO:0016747)	Thiolase, N-terminal domain (PF00108); Thiolase, C-terminal domain (PF02803)
NCU02283	-1.39342	0	protein phosphorylation (GO:0006468)	-	ATP binding (GO:0005524); protein kinase activity (GO:0004672)	Protein kinase domain (PF00069)
NCU00643	-1.39239	0	oxidation-reduction process (GO:0055114)	-	-	Zinc-binding dehydrogenase (PF00107); Alcohol dehydrogenase GroES-like domain (PF08240)
NCU11414	-1.39232	0	transmembrane transport (GO:0055085); metal ion transport (GO:0030001)	membrane (GO:0016020)	metal ion transmembrane transporter activity (GO:0046873)	ZIP Zinc transporter (PF02535)
NCU02480	-1.39019	0	-	-	-	Enoyl-(Acyl carrier protein) reductase (PF13561)
NCU09544	-1.38918	0	-	-	-	-
NCU05316	-1.38557	0	nucleoside metabolic process (GO:0009116)	-	catalytic activity (GO:0003824); protein binding (GO:0005515)	Ankyrin repeats (3 copies) (PF12796); Ankyrin repeat (PF00023); Phosphorylase superfamily (PF01048)
NCU03329	-1.38351	0	-	-	-	Protein of unknown function (DUF3632) (PF12311)
NCU09274	-1.38212	0	oxidation-reduction process (GO:0055114)	-	heme binding (GO:0020037); iron ion binding (GO:0005506); oxidoreductase activity, acting on paired donors, with incorporation or reduction of molecular oxygen (GO:0016705)	Cytochrome P450 (PF00067)
NCU08752	-1.37897	0	-	-	-	Carboxylesterase family (PF00135)
NCU07108	-1.3775	0	-	-	-	-
NCU03154	-1.37743	0	coenzyme A biosynthetic process (GO:0015937)	-	pantothenate kinase activity (GO:0004594); ATP binding (GO:0005524)	Fumble (PF03630)
NCU06918	-1.37584	0	transport (GO:0006810); transmembrane transport (GO:0055085)	membrane (GO:0016020)	transporter activity (GO:0005215)	Permease family (PF00860)
NCU06720	-1.37481	0	proteolysis (GO:0006508)	-	serine-type carboxypeptidase activity (GO:0004185)	Serine carboxypeptidase (PF00450)
NCU03471	-1.37476	0	-	integral component of membrane (GO:0016021); membrane (GO:0016020)	-	EamA-like transporter family (PF00892)
NCU07366	-1.37392	0	carbohydrate derivative metabolic process (GO:1901135)	-	carbohydrate derivative binding (GO:0097367)	SIS domain (PF01380); Glutamine amidotransferase domain (PF13522)
NCU03497	-1.3738	0	-	high-affinity iron permease complex (GO:0033573); membrane (GO:0016020)	iron ion transmembrane transporter activity (GO:0005381)	Iron permease FTR1 family (PF03239)
NCU00670	-1.37312	0	-	-	-	-
NCU10226	-1.37121	0	-	-	-	Endoribonuclease L-PSP (PF01042)
NCU06382	-1.36746	0	transport (GO:0006810); transmembrane transport (GO:0055085)	integral component of membrane (GO:0016021)	ATPase activity, coupled to transmembrane movement of substances (GO:0042626); ATPase activity (GO:0016887); ATP binding (GO:0005524)	ABC transporter (PF00005); ABC transporter transmembrane region (PF00664)
NCU06142	-1.36557	0	carbohydrate metabolic process (GO:0005975)	-	-	Transaldolase/Fructose-6-phosphate aldolase (PF00923)
NCU03613	-1.36501	0	-	-	-	Opy2 protein (PF09463)
NCU08169	-1.36478	0	-	-	-	-
NCU01456	-1.36473	0	-	-	-	Triose-phosphate Transporter family (PF03151)
NCU02362	-1.36381	0	-	-	-	-
NCU00862	-1.36322	0	-	-	-	-
NCU06558	-1.3592	0	oxidation-reduction process (GO:0055114)	-	oxidoreductase activity (GO:0016491)	FAD dependent oxidoreductase (PF01266)
NCU06815	-1.35769	0	-	-	-	Ring finger domain (PF13639)
NCU08366	-1.35752	0	-	-	transferase activity, transferring acyl groups other than amino-acyl groups (GO:0016747)	Acyltransferase family (PF01757)
NCU00306	-1.35398	0	transmembrane transport (GO:0055085)	integral component of membrane (GO:0016021)	-	Major Facilitator Superfamily (PF07690)
NCU07791	-1.35385	0	-	-	-	-
NCU04260	-1.35267	0	oxidation-reduction process (GO:0055114)	-	oxidoreductase activity (GO:0016491)	2OG-Fe(II) oxygenase superfamily (PF13640)
NCU05585	-1.35263	0	transmembrane transport (GO:0055085)	integral component of membrane (GO:0016021)	transmembrane transporter activity (GO:0022857)	Sugar (and other) transporter (PF00083)
NCU04264	-1.35201	0	nitrogen compound metabolic process (GO:0006807)	-	hydrolase activity (GO:0016787); glutamate-ammonia ligase activity (GO:0004356)	Glutamine synthetase, catalytic domain (PF00120); Amidohydrolase (PF04909)
NCU01436	-1.34945	0	-	-	-	-
NCU05936	-1.34851	0	-	-	GTP binding (GO:0005525)	Dynamin central region (PF01031); Dynamin family (PF00350)
NCU04540	-1.34767	0	-	-	protein binding (GO:0005515)	F-box-like (PF12937); WD domain, G-beta repeat (PF00400)
NCU07259	-1.3441	0	proteolysis (GO:0006508)	-	peptidase activity (GO:0008233)	Peptidase C13 family (PF01650)
NCU06435	-1.34248	0	-	-	-	Vacuolar sorting protein 9 (VPS9) domain (PF02204)
NCU07422	-1.34033	0	oxidation-reduction process (GO:0055114)	-	phosphogluconate dehydrogenase (decarboxylating) activity (GO:0004616)	NAD binding domain of 6-phosphogluconate dehydrogenase (PF03446); Domain of unknown function (DUF1932) (PF09130)
NCU05790	-1.33996	0	protein-chromophore linkage (GO:0018298); detection of visible light (GO:0009584); signal transduction (GO:0007165); phosphorelay signal transduction system (GO:0000160); regulation of transcription, DNA-templated (GO:0006355)	-	phosphorelay sensor kinase activity (GO:0000155); protein binding (GO:0005515)	Phytochrome region (PF00360); GAF domain (PF01590); His Kinase A (phospho-acceptor) domain (PF00512); Histidine kinase-, DNA gyrase B-, and HSP90-like ATPase (PF02518); Response regulator receiver domain (PF00072)
NCU16817	-1.33929	0	-	-	-	-
NCU07143	-1.33756	0	-	-	-	Lactonase, 7-bladed beta-propeller (PF10282)
NCU02616	-1.33587	0	-	-	protein binding (GO:0005515)	WD domain, G-beta repeat (PF00400); Anaphase-promoting complex subunit 4 WD40 domain (PF12894)
NCU04005	-1.33532	0	protein phosphorylation (GO:0006468)	-	ATP binding (GO:0005524); protein kinase activity (GO:0004672)	Protein kinase domain (PF00069)
NCU05653	-1.33009	0	-	-	-	Eukaryotic-type carbonic anhydrase (PF00194)
NCU08449	-1.32797	0	-	-	-	-
NCU02307	-1.3278	0	regulation of transcription, DNA-templated (GO:0006355)	nucleus (GO:0005634)	zinc ion binding (GO:0008270); RNA polymerase II transcription factor activity, sequence-specific DNA binding (GO:0000981)	Fungal specific transcription factor domain (PF11951); Fungal Zn(2)-Cys(6) binuclear cluster domain (PF00172)
NCU09002	-1.32732	0	electron transport chain (GO:0022900)	mitochondrion (GO:0005739); mitochondrial respiratory chain complex I (GO:0005747)	-	NADH-ubiquinone oxidoreductase B12 subunit family (PF08122)
NCU09223	-1.32676	0	cell redox homeostasis (GO:0045454)	-	-	Thioredoxin (PF00085); Thioredoxin-like domain (PF13848)
NCU05023	-1.3254	0	-	-	-	-
NCU08666	-1.32436	0	-	-	-	Haloacid dehalogenase-like hydrolase (PF13419)
NCU05062	-1.32416	0	-	-	-	OTT_1508-like deaminase (PF14441)
NCU00142	-1.32322	0	-	-	-	-
NCU02163	-1.31806	0	-	-	-	-
NCU08126	-1.31556	0	oxidation-reduction process (GO:0055114)	-	flavin adenine dinucleotide binding (GO:0050660); oxidoreductase activity (GO:0016491); catalytic activity (GO:0003824)	FAD linked oxidases, C-terminal domain (PF02913); FAD binding domain (PF01565)
NCU03605	-1.31538	0	-	-	hydrolase activity (GO:0016787)	Amidohydrolase (PF04909)
NCU03736	-1.31324	0	-	-	-	-
NCU02164	-1.31095	0	-	-	-	-
NCU07743	-1.30906	0	oxidation-reduction process (GO:0055114)	-	oxidoreductase activity (GO:0016491)	Taurine catabolism dioxygenase TauD, TfdA family (PF02668)
NCU01231	-1.30196	0	transmembrane transport (GO:0055085)	integral component of membrane (GO:0016021)	transmembrane transporter activity (GO:0022857)	Sugar (and other) transporter (PF00083)
NCU05303	-1.30195	0	-	-	-	-
NCU00866	-1.30092	0	-	-	-	Protein of unknown function (DUF1275) (PF06912)
NCU16597	-1.29855	0	-	-	-	Heterokaryon incompatibility protein (HET) (PF06985)
NCU02472	-1.2983	0	-	-	-	CHCH domain (PF06747)
NCU09336	-1.29816	0	-	-	-	-
NCU03641	-1.29195	0	carbohydrate metabolic process (GO:0005975)	-	hydrolase activity, hydrolyzing O-glycosyl compounds (GO:0004553)	Glycosyl hydrolase family 3 N terminal domain (PF00933); Fibronectin type III-like domain (PF14310); Glycosyl hydrolase family 3 C-terminal domain (PF01915)
NCU01305	-1.29058	0	-	integral component of membrane (GO:0016021)	serine-type endopeptidase activity (GO:0004252)	Rhomboid family (PF01694)
NCU08007	-1.28898	0	-	-	-	pfkB family carbohydrate kinase (PF00294)
NCU04781	-1.28867	0	-	-	-	NADH-ubiquinone oxidoreductase MWFE subunit (PF15879)
NCU05239	-1.28824	0	chitin biosynthetic process (GO:0006031)	-	chitin synthase activity (GO:0004100)	Chitin synthase N-terminal (PF08407); Chitin synthase (PF01644)
NCU09523	-1.28692	0	-	-	-	-
NCU01380	-1.28655	0	-	-	-	-
NCU07221	-1.28615	0	signal transduction (GO:0007165); phosphorelay signal transduction system (GO:0000160)	-	phosphorelay sensor kinase activity (GO:0000155)	Response regulator receiver domain (PF00072); His Kinase A (phospho-acceptor) domain (PF00512); Histidine kinase-, DNA gyrase B-, and HSP90-like ATPase (PF02518); PAS domain (PF13426)
NCU01204	-1.28288	0	-	-	-	Tropomyosin like (PF12718)
NCU01175	-1.27996	0	isoprenoid biosynthetic process (GO:0008299)	-	-	Polyprenyl synthetase (PF00348)
NCU04983	-1.27594	0	lipid biosynthetic process (GO:0008610); oxidation-reduction process (GO:0055114)	-	oxidoreductase activity (GO:0016491); iron ion binding (GO:0005506)	Fatty acid hydroxylase superfamily (PF04116)
NCU16454	-1.27444	0	-	-	-	short chain dehydrogenase (PF00106)
NCU07483	-1.27199	0	-	-	hydrolase activity (GO:0016787)	Calcineurin-like phosphoesterase (PF00149)
NCU03501	-1.27009	0	-	-	-	von Willebrand factor type A domain (PF00092)
NCU03944	-1.26973	0	-	-	protein binding (GO:0005515)	WD domain, G-beta repeat (PF00400)
NCU16347	-1.26957	0	-	-	-	-
NCU05820	-1.26782	0	-	-	-	-
NCU06402	-1.26646	0	lipid biosynthetic process (GO:0008610); oxidation-reduction process (GO:0055114)	-	oxidoreductase activity (GO:0016491); iron ion binding (GO:0005506)	Fatty acid hydroxylase superfamily (PF04116)
NCU00490	-1.26582	0	magnesium ion transport (GO:0015693)	integral component of membrane (GO:0016021)	magnesium ion transmembrane transporter activity (GO:0015095)	Magnesium transporter NIPA (PF05653)
NCU04195	-1.26522	0	transmembrane transport (GO:0055085)	membrane (GO:0016020)	transporter activity (GO:0005215)	Permease for cytosine/purines, uracil, thiamine, allantoin (PF02133)
NCU01446	-1.26213	0	-	-	-	Uracil phosphoribosyltransferase (PF14681)
NCU08683	-1.26004	0	-	-	GTPase activity (GO:0003924); GTP binding (GO:0005525)	Ras family (PF00071)
NCU04798	-1.25888	0	-	-	-	Glycosyl hydrolase family 92 (PF07971)
NCU06746	-1.25791	0	-	-	-	GET complex subunit GET2 (PF08690)
NCU06239	-1.25451	0	-	-	-	-
NCU01386	-1.24856	0	transcription, DNA-templated (GO:0006351); regulation of transcription, DNA-templated (GO:0006355)	nucleus (GO:0005634)	zinc ion binding (GO:0008270); DNA binding (GO:0003677); RNA polymerase II transcription factor activity, sequence-specific DNA binding (GO:0000981)	Fungal Zn(2)-Cys(6) binuclear cluster domain (PF00172); Fungal specific transcription factor domain (PF04082)
NCU11102	-1.24796	0	-	-	heat shock protein binding (GO:0031072); unfolded protein binding (GO:0051082)	DnaJ C terminal domain (PF01556); DnaJ central domain (PF00684); DnaJ domain (PF00226)
NCU06397	-1.24734	0	-	-	-	Profilin (PF00235)
NCU08889	-1.24628	0	-	-	-	-
NCU07174	-1.24619	0	-	-	-	SGF29 tudor-like domain (PF07039)
NCU01181	-1.24288	0	oxidation-reduction process (GO:0055114)	-	flavin adenine dinucleotide binding (GO:0050660); oxidoreductase activity, acting on the CH-CH group of donors (GO:0016627)	Acyl-CoA dehydrogenase, middle domain (PF02770); Acyl-CoA dehydrogenase, C-terminal domain (PF00441); Acyl-CoA dehydrogenase, N-terminal domain (PF02771)
NCU07576	-1.2415	0	metabolic process (GO:0008152)	-	transferase activity, transferring acyl groups (GO:0016746)	Acyltransferase (PF01553)
NCU01765	-1.24131	0	oxidation-reduction process (GO:0055114)	-	oxidoreductase activity (GO:0016491); oxidoreductase activity, acting on NAD(P)H (GO:0016651); iron-sulfur cluster binding (GO:0051536)	2Fe-2S iron-sulfur cluster binding domain (PF13510); NADH-ubiquinone oxidoreductase subunit G, C-terminal (PF09326); NADH-ubiquinone oxidoreductase-G iron-sulfur binding region (PF10588); Molybdopterin oxidoreductase (PF00384)
NCU01360	-1.24077	0	-	-	-	NADH:ubiquinone oxidoreductase, NDUFS5-15kDa (PF10200)
NCU07976	-1.23959	0	-	-	-	-
NCU07947	-1.23845	0	intermembrane lipid transfer (GO:0120009)	cytoplasm (GO:0005737)	intermembrane lipid transfer activity (GO:0120013)	Glycolipid transfer protein (GLTP) (PF08718)
NCU03795	-1.23816	0	-	-	GTP binding (GO:0005525)	Septin (PF00735)
NCU09425	-1.23797	0	-	-	-	Glycosyltransferase family 36 (PF06165); Glycosyl hydrolase 36 superfamily, catalytic domain (PF17167)
NCU00629	-1.2362	0	glycolytic process (GO:0006096)	-	6-phosphofructokinase activity (GO:0003872)	Phosphofructokinase (PF00365)
NCU05164	-1.23548	0	-	-	-	short chain dehydrogenase (PF00106)
NCU10237	-1.23484	0	lipid metabolic process (GO:0006629)	-	phosphoric diester hydrolase activity (GO:0008081)	Glycerophosphoryl diester phosphodiesterase family (PF03009)
NCU16323	-1.23442	0	-	-	-	-
NCU09825	-1.23271	0	histone acetylation (GO:0016573); regulation of transcription, DNA-templated (GO:0006355)	-	histone acetyltransferase activity (GO:0004402)	Histone acetylation protein (PF08214)
NCU11109	-1.23216	0	-	endoplasmic reticulum membrane (GO:0005789); integral component of membrane (GO:0016021)	-	ORMDL family (PF04061)
NCU01902	-1.2301	0	-	-	N-acetyltransferase activity (GO:0008080)	Acetyltransferase (GNAT) family (PF00583)
NCU02299	-1.22878	0	oxidation-reduction process (GO:0055114)	-	-	N-terminal domain of oxidoreductase (PF16884); Zinc-binding dehydrogenase (PF00107)
NCU01859	-1.22824	0	-	-	-	NADH-ubiquinone oxidoreductase complex I, 21 kDa subunit (PF10785); C-terminal of NADH-ubiquinone oxidoreductase 21 kDa subunit (PF12853)
NCU01979	-1.22736	0	cellular aromatic compound metabolic process (GO:0006725); catechol-containing compound metabolic process (GO:0009712); oxidation-reduction process (GO:0055114)	-	iron ion binding (GO:0005506); ferric iron binding (GO:0008199); catechol 1,2-dioxygenase activity (GO:0018576); catalytic activity (GO:0003824)	Catechol dioxygenase N terminus (PF04444); Dioxygenase (PF00775)
NCU05257	-1.22561	0	regulation of transcription, DNA-templated (GO:0006355)	-	DNA binding (GO:0003677)	Homeobox KN domain (PF05920); Tc5 transposase DNA-binding domain (PF03221)
NCU07442	-1.22559	0	metabolic process (GO:0008152); oxidation-reduction process (GO:0055114)	-	oxidoreductase activity (GO:0016491)	Aldehyde dehydrogenase family (PF00171)
NCU02201	-1.22449	0	oxidation-reduction process (GO:0055114)	-	oxidoreductase activity (GO:0016491); copper ion binding (GO:0005507)	Multicopper oxidase (PF00394); Multicopper oxidase (PF07731); Multicopper oxidase (PF07732)
NCU03192	-1.22446	0	-	-	-	-
NCU01142	-1.22445	0	-	membrane (GO:0016020)	electron transfer activity (GO:0009055); NADH dehydrogenase (ubiquinone) activity (GO:0008137)	NADH ubiquinone oxidoreductase subunit NDUFA12 (PF05071)
NCU05315	-1.22419	0	-	-	-	-
NCU00215	-1.2234	0	-	-	-	Protein of unknown function (DUF3605) (PF12239)
NCU08440	-1.22215	0	-	-	N-acetyltransferase activity (GO:0008080)	Acetyltransferase (GNAT) domain (PF13673)
NCU06771	-1.22139	0	protein retention in ER lumen (GO:0006621)	integral component of membrane (GO:0016021)	ER retention sequence binding (GO:0046923)	ER lumen protein retaining receptor (PF00810)
NCU00122	-1.22131	0	proteolysis (GO:0006508)	-	zinc ion binding (GO:0008270); aminopeptidase activity (GO:0004177)	Aminopeptidase I zinc metalloprotease (M18) (PF02127)
NCU05025	-1.2212	0	-	-	-	-
NCU04731	-1.2203	0	positive regulation of transcription by RNA polymerase II (GO:0045944); SREBP signaling pathway (GO:0032933)	-	protein dimerization activity (GO:0046983)	Domain of unknown function (DUF2014) (PF09427); Helix-loop-helix DNA-binding domain (PF00010)
NCU06524	-1.21714	0	-	-	-	Phosphatidylethanolamine-binding protein (PF01161)
NCU05781	-1.21205	0	-	-	-	HORMA domain (PF02301)
NCU11313	-1.21203	0	signal peptide processing (GO:0006465)	integral component of membrane (GO:0016021); signal peptidase complex (GO:0005787)	peptidase activity (GO:0008233)	Microsomal signal peptidase 12 kDa subunit (SPC12) (PF06645)
NCU03342	-1.21187	0	-	-	-	PPR repeat (PF01535)
NCU06907	-1.21055	0	-	-	-	Zinc finger, C2H2 type (PF00096)
NCU04350	-1.20911	0	-	myosin complex (GO:0016459)	motor activity (GO:0003774); ATP binding (GO:0005524)	Cytochrome b5-like Heme/Steroid binding domain (PF00173); DEK C terminal domain (PF08766); Myosin head (motor domain) (PF00063); Chitin synthase (PF03142)
NCU03093	-1.2063	0	-	-	-	-
NCU10042	-1.20215	0	-	-	-	Enolase, C-terminal TIM barrel domain (PF00113); Enolase, N-terminal domain (PF03952)
NCU10059	-1.2018	0	metabolic process (GO:0008152); oxidation-reduction process (GO:0055114)	-	oxidoreductase activity (GO:0016491)	Oxidoreductase family, NAD-binding Rossmann fold (PF01408); Oxidoreductase family, C-terminal alpha/beta domain (PF02894)
NCU07281	-1.20104	0	glycolytic process (GO:0006096); gluconeogenesis (GO:0006094)	-	glucose-6-phosphate isomerase activity (GO:0004347)	Phosphoglucose isomerase (PF00342)
NCU04298	-1.19876	0	-	-	3-dehydroquinate dehydratase activity (GO:0003855)	Type I 3-dehydroquinase (PF01487)
NCU04202	-1.19689	0	-	-	-	Nucleoside diphosphate kinase (PF00334)
NCU10897	-1.19654	0	attachment of spindle microtubules to kinetochore (GO:0008608)	mitotic spindle (GO:0072686); DASH complex (GO:0042729)	-	DASH complex subunit Dad4 (PF08650)
NCU00666	-1.1893	0	-	-	-	-
NCU06983	-1.18632	0	-	-	-	-
NCU07869	-1.18617	0	-	-	-	Insulin-induced protein (INSIG) (PF07281)
NCU02280	-1.18551	0	-	-	-	-
NCU03246	-1.18514	0	dephosphorylation (GO:0016311)	-	protein tyrosine/serine/threonine phosphatase activity (GO:0008138)	Dual specificity phosphatase, catalytic domain (PF00782); Dual specificity protein phosphatase, N-terminal half (PF14671)
NCU03611	-1.18503	0	chitin biosynthetic process (GO:0006031)	-	chitin synthase activity (GO:0004100)	Chitin synthase N-terminal (PF08407); Chitin synthase (PF01644)
NCU08359	-1.18398	0	-	-	-	Cytidine and deoxycytidylate deaminase zinc-binding region (PF00383)
NCU08411	-1.18216	0	biosynthetic process (GO:0009058)	-	pyridoxal phosphate binding (GO:0030170)	Aminotransferase class I and II (PF00155)
NCU03681	-1.18205	0	-	-	-	-
NCU05775	-1.18181	0	-	-	-	Transmembrane amino acid transporter protein (PF01490)
NCU01750	-1.18152	0	-	-	-	-
NCU07126	-1.18056	0	-	-	N-acetyltransferase activity (GO:0008080)	Acetyltransferase (GNAT) family (PF00583)
NCU01996	-1.18033	0	-	plasma membrane (GO:0005886)	-	SUR7/PalI family (PF06687)
NCU04963	-1.17863	0	transmembrane transport (GO:0055085)	integral component of membrane (GO:0016021)	transmembrane transporter activity (GO:0022857)	Sugar (and other) transporter (PF00083)
NCU11353	-1.17591	0	carbohydrate metabolic process (GO:0005975)	-	phosphotransferase activity, alcohol group as acceptor (GO:0016773)	FGGY family of carbohydrate kinases, N-terminal domain (PF00370); FGGY family of carbohydrate kinases, C-terminal domain (PF02782)
NCU01169	-1.17535	0	-	-	-	Thioredoxin-like [2Fe-2S] ferredoxin (PF01257)
NCU07949	-1.17517	0	-	-	-	-
NCU05647	-1.17339	0	-	-	-	Domain of unknown function (DUF4188) (PF13826)
NCU03006	-1.17337	0	metabolic process (GO:0008152); steroid biosynthetic process (GO:0006694)	-	methyltransferase activity (GO:0008168)	Sterol methyltransferase C-terminal (PF08498); Methyltransferase domain (PF08241)
NCU00484	-1.17254	0	-	-	-	Zinc-finger domain (PF10276)
NCU04442	-1.17019	0	-	-	coenzyme binding (GO:0050662); catalytic activity (GO:0003824)	NAD dependent epimerase/dehydratase family (PF01370)
NCU02468	-1.17005	0	-	integral component of membrane (GO:0016021)	-	TLC domain (PF03798); TRAM1-like protein (PF08390)
NCU02886	-1.16987	0	-	-	-	-
NCU03083	-1.16833	0	-	-	-	-
NCU09332	-1.16679	0	protein O-linked glycosylation (GO:0006493)	membrane (GO:0016020)	mannosyltransferase activity (GO:0000030)	C-terminal four TMM region of protein-O-mannosyltransferase (PF16192); Dolichyl-phosphate-mannose-protein mannosyltransferase (PF02366); MIR domain (PF02815)
NCU00821	-1.16619	0	transmembrane transport (GO:0055085)	integral component of membrane (GO:0016021)	transmembrane transporter activity (GO:0022857)	Sugar (and other) transporter (PF00083)
NCU02786	-1.16311	0	carbohydrate metabolic process (GO:0005975)	-	isomerase activity (GO:0016853)	Aldose 1-epimerase (PF01263)
NCU08930	-1.16223	0	-	-	-	-
NCU10069	-1.16194	0	-	-	-	-
NCU05723	-1.16129	0	-	-	-	-
NCU04569	-1.16093	0	-	-	hydrolase activity (GO:0016787); catalytic activity (GO:0003824)	Hydantoinase B/oxoprolinase (PF02538); Hydantoinase/oxoprolinase N-terminal region (PF05378); Hydantoinase/oxoprolinase (PF01968)
NCU05546	-1.16066	0	transmembrane transport (GO:0055085)	integral component of membrane (GO:0016021)	-	Major Facilitator Superfamily (PF07690)
NCU04675	-1.15834	0	-	-	-	-
NCU04771	-1.15796	0	oxidation-reduction process (GO:0055114)	-	oxidoreductase activity (GO:0016491)	FAD dependent oxidoreductase (PF01266)
NCU00714	-1.15667	0	-	-	protein binding (GO:0005515)	Tetratricopeptide repeat (PF13181); Tetratricopeptide repeat (PF07719); Tetratricopeptide repeat (PF13424)
NCU04988	-1.15632	0	-	-	-	-
NCU03081	-1.15509	0	-	-	-	-
NCU06704	-1.15446	0	-	endoplasmic reticulum (GO:0005783)	-	Ribosome associated membrane protein RAMP4 (PF06624)
NCU06987	-1.15096	0	-	-	-	Organic solute transporter Ostalpha (PF03619)
NCU06910	-1.1509	0	-	-	-	WSC domain (PF01822)
NCU04786	-1.15069	0	-	-	ATP binding (GO:0005524)	Helicase conserved C-terminal domain (PF00271); SNF2 family N-terminal domain (PF00176)
NCU04430	-1.15025	0	-	-	-	Peptidase family M28 (PF04389); PA domain (PF02225)
NCU04095	-1.14955	0	-	-	protein binding (GO:0005515)	Variant SH3 domain (PF07653); Transglutaminase-like superfamily (PF01841)
NCU06144	-1.14724	0	microtubule-based movement (GO:0007018)	-	ATP binding (GO:0005524); microtubule binding (GO:0008017); microtubule motor activity (GO:0003777)	Kinesin motor domain (PF00225)
NCU07849	-1.14677	0	-	-	-	TENA/THI-4/PQQC family (PF03070); Phosphomethylpyrimidine kinase (PF08543)
NCU04801	-1.14559	0	-	-	-	Chalcone and stilbene synthases, C-terminal domain (PF02797); Chalcone and stilbene synthases, N-terminal domain (PF00195)
NCU11381	-1.14251	0	-	-	ATP binding (GO:0005524)	GHMP kinases N terminal domain (PF00288)
NCU06206	-1.14208	0	-	-	-	-
NCU05985	-1.14059	0	metabolic process (GO:0008152)	-	transferase activity, transferring acyl groups (GO:0016746)	Acyltransferase (PF01553)
NCU02089	-1.13903	0	-	-	-	-
NCU02257	-1.13838	0	protein dephosphorylation (GO:0006470)	-	protein tyrosine phosphatase activity (GO:0004725)	Protein-tyrosine phosphatase (PF00102)
NCU00432	-1.13816	0	-	-	-	-
NCU04594	-1.13798	0	oxidation-reduction process (GO:0055114)	-	peroxiredoxin activity (GO:0051920)	Carboxymuconolactone decarboxylase family (PF02627)
NCU07471	-1.13777	0	barbed-end actin filament capping (GO:0051016)	F-actin capping protein complex (GO:0008290)	-	F-actin capping protein, beta subunit (PF01115)
NCU07895	-1.13726	0	-	-	-	-
NCU08027	-1.13686	0	-	-	hydrolase activity (GO:0016787)	GDA1/CD39 (nucleoside phosphatase) family (PF01150)
NCU00340	-1.13653	0	regulation of transcription, DNA-templated (GO:0006355)	nucleus (GO:0005634)	DNA-binding transcription factor activity (GO:0003700)	Zinc finger, C2H2 type (PF00096); STE like transcription factor (PF02200)
NCU03032	-1.13467	0	-	-	-	Methyltransferase domain (PF13489); Protein of unknown function (DUF3419) (PF11899)
NCU08269	-1.13454	0	-	-	-	Pyridoxine 5'-phosphate oxidase C-terminal dimerisation region (PF10590); Pyridoxamine 5'-phosphate oxidase (PF01243)
NCU16396	-1.13423	0	oxidation-reduction process (GO:0055114)	-	oxidoreductase activity (GO:0016491)	Flavin containing amine oxidoreductase (PF01593)
NCU08063	-1.13335	0	transcription, DNA-templated (GO:0006351); regulation of transcription, DNA-templated (GO:0006355)	nucleus (GO:0005634)	zinc ion binding (GO:0008270); DNA binding (GO:0003677); RNA polymerase II transcription factor activity, sequence-specific DNA binding (GO:0000981)	Fungal Zn(2)-Cys(6) binuclear cluster domain (PF00172); Fungal specific transcription factor domain (PF04082)
NCU07472	-1.13294	0	-	-	transferase activity, transferring glycosyl groups (GO:0016757)	Alg9-like mannosyltransferase family (PF03901)
NCU09299	-1.1325	0	-	-	-	GRIM-19 protein (PF06212)
NCU03015	-1.13201	0	-	-	-	Heterokaryon incompatibility protein (HET) (PF06985)
NCU09272	-1.13111	0	-	-	-	-
NCU08047	-1.13064	0	-	-	-	-
NCU01440	-1.1294	0	-	myosin complex (GO:0016459)	protein binding (GO:0005515); motor activity (GO:0003774); ATP binding (GO:0005524)	Myosin N-terminal SH3-like domain (PF02736); IQ calmodulin-binding motif (PF00612); Myosin head (motor domain) (PF00063); DIL domain (PF01843)
NCU06971	-1.12721	0	transcription, DNA-templated (GO:0006351); regulation of transcription, DNA-templated (GO:0006355)	nucleus (GO:0005634)	zinc ion binding (GO:0008270); DNA binding (GO:0003677); RNA polymerase II transcription factor activity, sequence-specific DNA binding (GO:0000981)	Fungal Zn(2)-Cys(6) binuclear cluster domain (PF00172); Fungal specific transcription factor domain (PF04082)
NCU00810	-1.12601	0	carbohydrate metabolic process (GO:0005975)	beta-galactosidase complex (GO:0009341)	beta-galactosidase activity (GO:0004565); hydrolase activity, hydrolyzing O-glycosyl compounds (GO:0004553)	Domain of unknown function(DUF4981) (PF16353); Beta galactosidase small chain (PF02929); Glycosyl hydrolases family 2, sugar binding domain (PF02837); Glycosyl hydrolases family 2 (PF00703); Glycosyl hydrolases family 2, TIM barrel domain (PF02836)
NCU04987	-1.12508	0	-	integral component of membrane (GO:0016021)	-	Haemolysin-III related (PF03006)
NCU04281	-1.12377	0	-	-	protein binding (GO:0005515)	WD domain, G-beta repeat (PF00400)
NCU09599	-1.12255	0	-	-	-	Protein of unknown function (DUF3128) (PF11326)
NCU07679	-1.11691	0	chromosome organization (GO:0051276)	chromosome (GO:0005694)	ATP binding (GO:0005524); protein binding (GO:0005515)	SMC proteins Flexible Hinge Domain (PF06470); RecF/RecN/SMC N terminal domain (PF02463)
NCU00171	-1.11592	0	-	-	calcium ion binding (GO:0005509)	EF-hand domain (PF13405)
NCU04621	-1.11563	0	oxidation-reduction process (GO:0055114)	-	metal ion binding (GO:0046872); oxidoreductase activity, acting on single donors with incorporation of molecular oxygen, incorporation of two atoms of oxygen (GO:0016702)	Lipoxygenase (PF00305)
NCU06863	-1.11508	0	nucleosome assembly (GO:0006334)	nucleus (GO:0005634); nucleosome (GO:0000786)	DNA binding (GO:0003677)	linker histone H1 and H5 family (PF00538)
NCU07403	-1.11384	0	-	-	-	ER membrane protein SH3 (PF08229)
NCU00160	-1.11334	0	-	-	-	-
NCU16638	-1.11321	0	-	-	protein disulfide oxidoreductase activity (GO:0015035)	DSBA-like thioredoxin domain (PF01323)
NCU03314	-1.11281	0	-	-	-	Mob1/phocein family (PF03637)
NCU05264	-1.10765	0	-	-	-	Haloacid dehalogenase-like hydrolase (PF13419)
NCU00520	-1.10754	0	oxidation-reduction process (GO:0055114)	-	oxidoreductase activity, acting on paired donors, with incorporation or reduction of molecular oxygen, 2-oxoglutarate as one donor, and incorporation of one atom each of oxygen into both donors (GO:0016706); iron ion binding (GO:0005506); L-ascorbic acid binding (GO:0031418)	Oxoglutarate and iron-dependent oxygenase degradation C-term (PF10637); 2OG-Fe(II) oxygenase superfamily (PF13661)
NCU06179	-1.10556	0	protein phosphorylation (GO:0006468)	-	ATP binding (GO:0005524); protein kinase activity (GO:0004672)	Protein kinase domain (PF00069)
NCU03691	-1.10393	0	proteasome assembly (GO:0043248)	-	-	Proteasome assembly chaperone 4 (PF16093)
NCU03306	-1.10225	0	post-chaperonin tubulin folding pathway (GO:0007023); tubulin complex assembly (GO:0007021)	-	beta-tubulin binding (GO:0048487)	Tubulin binding cofactor A (PF02970)
NCU00202	-1.10212	0	-	-	protein binding (GO:0005515)	Domain of unknown function (DUF1899) (PF08953); Type of WD40 repeat (PF16300); WD domain, G-beta repeat (PF00400)
NCU02202	-1.10042	0	mRNA processing (GO:0006397); protein phosphorylation (GO:0006468)	-	protein kinase activity (GO:0004672); ATP binding (GO:0005524); ribonuclease activity (GO:0004540)	Ribonuclease 2-5A (PF06479); Protein kinase domain (PF00069)
NCU08607	-1.09942	0	-	-	-	Endoplasmic Reticulum-Golgi Intermediate Compartment (ERGIC) (PF13850); Endoplasmic reticulum vesicle transporter (PF07970)
NCU06963	-1.09899	0	-	-	-	-
NCU09260	-1.09809	0	-	-	-	-
NCU04151	-1.09746	0	-	-	-	Sec1-binding region of Mso1 (PF14475)
NCU01953	-1.09671	0	cortical protein anchoring (GO:0032065)	cell cortex (GO:0005938)	phospholipid binding (GO:0005543); protein binding (GO:0005515)	Meiotic cell cortex C-terminal pleckstrin homology (PF12814)
NCU03626	-1.09621	0	-	-	-	-
NCU02609	-1.09439	0	-	-	-	-
NCU02382	-1.09357	0	ubiquitin-dependent protein catabolic process (GO:0006511)	intracellular (GO:0005622)	thiol-dependent ubiquitin-specific protease activity (GO:0004843)	Ubiquitin carboxyl-terminal hydrolase, family 1 (PF01088)
NCU03756	-1.09268	0	biosynthetic process (GO:0009058)	-	pyridoxal phosphate binding (GO:0030170)	Aminotransferase class I and II (PF00155)
NCU08076	-1.09194	0	-	-	-	-
NCU00701	-1.08741	0	peptidoglycan catabolic process (GO:0009253); cell wall macromolecule catabolic process (GO:0016998)	-	lysozyme activity (GO:0003796)	Glycosyl hydrolases family 25 (PF01183)
NCU06699	-1.08462	0	transmembrane transport (GO:0055085); cation transport (GO:0006812)	integral component of membrane (GO:0016021)	cation transmembrane transporter activity (GO:0008324)	Dimerisation domain of Zinc Transporter (PF16916); Cation efflux family (PF01545)
NCU05228	-1.08425	0	-	-	-	Ubiquitin-2 like Rad60 SUMO-like (PF13881)
NCU00782	-1.08164	0	transmembrane transport (GO:0055085)	integral component of membrane (GO:0016021)	-	Major Facilitator Superfamily (PF07690)
NCU04129	-1.08048	0	-	-	-	Mycolic acid cyclopropane synthetase (PF02353)
NCU00515	-1.07936	0	-	-	-	Ring finger domain (PF13639)
NCU00162	-1.07793	0	-	membrane (GO:0016020)	-	Legume-like lectin family (PF03388)
NCU08927	-1.07594	0	lipid metabolic process (GO:0006629)	-	-	Fatty acid desaturase (PF00487); Sphingolipid Delta4-desaturase (DES) (PF08557)
NCU03515	-1.07164	0	-	-	GTP binding (GO:0005525)	Septin (PF00735)
NCU07110	-1.07095	0	-	-	protein binding (GO:0005515)	F-box domain (PF00646)
NCU02235	-1.07021	0	-	membrane (GO:0016020)	mannosyl-oligosaccharide 1,2-alpha-mannosidase activity (GO:0004571); calcium ion binding (GO:0005509)	Glycosyl hydrolase family 47 (PF01532)
NCU02399	-1.0602	0	-	-	-	-
NCU02829	-1.05895	0	GDP-mannose biosynthetic process (GO:0009298)	cytoplasm (GO:0005737)	phosphomannomutase activity (GO:0004615)	Eukaryotic phosphomannomutase (PF03332)
NCU09810	-1.05858	0	metabolic process (GO:0008152)	-	cofactor binding (GO:0048037); catalytic activity (GO:0003824)	CoA binding domain (PF02629); CoA-ligase (PF00549)
NCU05646	-1.05815	0	-	-	-	-
NCU07458	-1.05749	0	organic substance metabolic process (GO:0071704); carbohydrate metabolic process (GO:0005975)	-	intramolecular transferase activity, phosphotransferases (GO:0016868)	Phosphoglucomutase/phosphomannomutase, C-terminal domain (PF00408); Phosphoglucomutase/phosphomannomutase, alpha/beta/alpha domain I (PF02878)
NCU03364	-1.05671	0	-	-	-	uDENN domain (PF03456); DENN (AEX-3) domain (PF02141)
NCU04074	-1.05638	0	oxidation-reduction process (GO:0055114)	-	NADH dehydrogenase (ubiquinone) activity (GO:0008137)	Respiratory-chain NADH dehydrogenase, 30 Kd subunit (PF00329)
NCU01911	-1.05469	0	-	-	-	GDP/GTP exchange factor Sec2p (PF06428)
NCU07746	-1.05452	0	-	-	-	Tetratricopeptide repeat (PF07719)
NCU08009	-1.05336	0	DNA replication initiation (GO:0006270)	-	DNA binding (GO:0003677); ATP binding (GO:0005524)	MCM N-terminal domain (PF14551); MCM OB domain (PF17207); MCM2/3/5 family (PF00493)
NCU03755	-1.05315	0	oxidation-reduction process (GO:0055114)	-	flavin adenine dinucleotide binding (GO:0050660); NADP binding (GO:0050661); N,N-dimethylaniline monooxygenase activity (GO:0004499)	NAD(P)-binding Rossmann-like domain (PF13450); Flavin-binding monooxygenase-like (PF00743)
NCU06122	-1.05003	0	regulation of GTPase activity (GO:0043087)	-	protein binding (GO:0005515)	GTPase-activator protein for Ras-like GTPase (PF00616); RasGAP C-terminus (PF03836)
NCU06310	-1.0491	0	-	cytoplasm (GO:0005737)	pyrophosphatase activity (GO:0016462)	DHHA2 domain (PF02833); DHH family (PF01368)
NCU02464	-1.04883	0	-	-	GTP binding (GO:0005525)	Septin (PF00735)
NCU07762	-1.04557	0	-	membrane (GO:0016020)	transferase activity, transferring glycosyl groups (GO:0016757)	Fringe-like (PF02434); PAN domain (PF00024)
NCU09646	-1.04484	0	metabolic process (GO:0008152)	-	transferase activity, transferring acyl groups other than amino-acyl groups (GO:0016747)	Thiolase, N-terminal domain (PF00108); Thiolase, C-terminal domain (PF02803)
NCU03637	-1.04413	0	proteolysis (GO:0006508)	-	metalloendopeptidase activity (GO:0004222)	Peptidase family M48 (PF01435); CAAX prenyl protease N-terminal, five membrane helices (PF16491)
NCU09243	-1.04255	0	-	-	-	-
NCU02122	-1.03417	0	anion transport (GO:0006820)	integral component of membrane (GO:0016021)	-	HCO3- transporter family (PF00955)
NCU03263	-1.03413	0	-	-	-	C2 domain (PF00168)
NCU08944	-1.03118	0	-	-	N-acetyltransferase activity (GO:0008080)	Acetyltransferase (GNAT) family (PF00583)
NCU00248	-1.02961	0	-	-	-	-
NCU02915	-1.02848	0	signal transduction (GO:0007165)	-	-	RhoGAP domain (PF00620); Fungal N-terminal domain of STAND proteins (PF17111)
NCU01478	-1.02698	0	transcription, DNA-templated (GO:0006351); regulation of transcription, DNA-templated (GO:0006355)	nucleus (GO:0005634)	zinc ion binding (GO:0008270); DNA binding (GO:0003677); RNA polymerase II transcription factor activity, sequence-specific DNA binding (GO:0000981)	Fungal Zn(2)-Cys(6) binuclear cluster domain (PF00172); Fungal specific transcription factor domain (PF04082)
NCU02659	-1.02608	0	-	-	-	Nuclear pore assembly and biogenesis (PF12716)
NCU01977	-1.02411	0	transport (GO:0006810); transmembrane transport (GO:0055085)	membrane (GO:0016020)	transporter activity (GO:0005215)	Sodium:solute symporter family (PF00474)
NCU00183	-1.02386	0	-	-	-	Putative S-adenosyl-L-methionine-dependent methyltransferase (PF02636)
NCU02745	-1.01922	0	-	-	-	-
NCU06275	-1.01798	0	-	-	-	-
NCU08155	-1.01711	0	-	-	-	-
NCU09400	-1.01617	0	-	-	-	-
NCU06602	-1.01463	0	-	-	-	-
NCU03731	-1.01314	0	-	-	-	Haloacid dehalogenase-like hydrolase (PF13419)
NCU06245	-1.01229	0	lipid metabolic process (GO:0006629); signal transduction (GO:0007165); intracellular signal transduction (GO:0035556)	-	phosphatidylinositol phospholipase C activity (GO:0004435)	Phosphatidylinositol-specific phospholipase C, X domain (PF00388); Phosphatidylinositol-specific phospholipase C, Y domain (PF00387); C2 domain (PF00168)
NCU03399	-1.01204	0	-	-	-	-
NCU00665	-1.01198	0	-	-	hydrolase activity (GO:0016787)	Calcineurin-like phosphoesterase (PF00149)
NCU03604	-1.01181	0	-	-	-	-
NCU11348	-1.01144	0	-	mitochondrion (GO:0005739)	NADH dehydrogenase activity (GO:0003954); NADH dehydrogenase (ubiquinone) activity (GO:0008137)	NADH-ubiquinone oxidoreductase B18 subunit (NDUFB7) (PF05676)
NCU07117	-1.00868	0	-	-	-	L-lysine 6-monooxygenase (NADPH-requiring) (PF13434)
NCU02730	-1.00774	0	-	-	-	-
NCU10008	-1.00546	0	tricarboxylic acid cycle (GO:0006099)	-	lyase activity (GO:0016829)	Fumarase C C-terminus (PF10415); Lyase (PF00206)
NCU00720	-1.00465	0	oxidation-reduction process (GO:0055114)	-	oxidoreductase activity (GO:0016491); oxidoreductase activity, acting on the CH-OH group of donors, NAD or NADP as acceptor (GO:0016616)	lactate/malate dehydrogenase, alpha/beta C-terminal domain (PF02866); lactate/malate dehydrogenase, NAD binding domain (PF00056)
NCU01756	-1.00107	0	-	-	-	Actin (PF00022)
NCU01179	1.0002	0	transmembrane transport (GO:0055085)	mitochondrial outer membrane (GO:0005741)	-	Eukaryotic porin (PF01459)
NCU07057	1.00059	0	-	-	-	Mitochondrial ribosomal protein L27 (PF09809)
NCU09994	1.00072	0	-	-	-	-
NCU03579	1.00163	0	-	-	-	Alanine racemase, N-terminal domain (PF01168)
NCU03759	1.00232	0	tRNA aminoacylation for protein translation (GO:0006418)	-	aminoacyl-tRNA ligase activity (GO:0004812); nucleotide binding (GO:0000166); ATP binding (GO:0005524)	tRNA synthetases class I (M) (PF09334)
NCU00904	1.00671	0	oxidation-reduction process (GO:0055114)	-	flavin adenine dinucleotide binding (GO:0050660); oxidoreductase activity (GO:0016491); catalytic activity (GO:0003824)	FAD binding domain (PF01565); FAD linked oxidases, C-terminal domain (PF02913)
NCU07075	1.0096	0	transmembrane transport (GO:0055085)	integral component of membrane (GO:0016021)	-	Sodium/calcium exchanger protein (PF01699)
NCU06576	1.01023	0	-	-	-	PI31 proteasome regulator (PF08577); PI31 proteasome regulator N-terminal (PF11566)
NCU04153	1.0106	0	RNA processing (GO:0006396)	-	-	TruB family pseudouridylate synthase (N terminal domain) (PF01509); tRNA pseudouridylate synthase B C-terminal domain (PF16198)
NCU00587	1.01203	0	protein phosphorylation (GO:0006468)	-	ATP binding (GO:0005524); protein kinase activity (GO:0004672)	Protein kinase domain (PF00069)
NCU09892	1.01313	0	tRNA aminoacylation for protein translation (GO:0006418)	-	aminoacyl-tRNA ligase activity (GO:0004812); nucleotide binding (GO:0000166); ATP binding (GO:0005524)	tRNA synthetase class II core domain (G, H, P, S and T) (PF00587); Anticodon binding domain (PF03129)
NCU09528	1.01356	0	-	-	-	Ribosome biogenesis protein Nop16 (PF09420)
NCU07607	1.01429	0	transmembrane transport (GO:0055085)	integral component of membrane (GO:0016021)	transmembrane transporter activity (GO:0022857)	Sugar (and other) transporter (PF00083)
NCU07814	1.0149	0	-	-	-	Protein of unknown function DUF89 (PF01937)
NCU08926	1.01584	0	-	-	-	N-terminal region of Chorein or VPS13 (PF12624); Autophagy-related protein 2 CAD motif (PF13329); Autophagy-related protein C terminal domain (PF09333)
NCU08399	1.01595	0	-	-	-	KR domain (PF08659); Polyketide synthase dehydratase (PF14765); Beta-ketoacyl synthase, C-terminal domain (PF02801); Beta-ketoacyl synthase, N-terminal domain (PF00109); Acyl transferase domain (PF00698); Phosphopantetheine attachment site (PF00550)
NCU03133	1.01727	0	rRNA processing (GO:0006364)	small-subunit processome (GO:0032040)	-	Utp11 protein (PF03998)
NCU01483	1.01817	0	-	-	-	-
NCU07271	1.0198	0	-	-	-	Beta-lactamase superfamily domain (PF12706)
NCU04940	1.02018	0	oxidation-reduction process (GO:0055114)	-	-	Alcohol dehydrogenase GroES-like domain (PF08240); Zinc-binding dehydrogenase (PF13602)
NCU00281	1.0222	0	metabolic process (GO:0008152); carbohydrate metabolic process (GO:0005975); lipid glycosylation (GO:0030259)	-	transferase activity, transferring hexosyl groups (GO:0016758)	UDP-glucoronosyl and UDP-glucosyl transferase (PF00201); Glycosyltransferase family 28 N-terminal domain (PF03033)
NCU02896	1.02282	0	transcription, DNA-templated (GO:0006351); regulation of transcription, DNA-templated (GO:0006355)	nucleus (GO:0005634)	zinc ion binding (GO:0008270); DNA binding (GO:0003677); RNA polymerase II transcription factor activity, sequence-specific DNA binding (GO:0000981)	Fungal Zn(2)-Cys(6) binuclear cluster domain (PF00172); Fungal specific transcription factor domain (PF04082)
NCU02700	1.02426	0	-	-	-	Protein of unknown function (DUF3074) (PF11274)
NCU08194	1.02464	0	oxidation-reduction process (GO:0055114)	-	oxidoreductase activity (GO:0016491)	Ferric reductase NAD binding domain (PF08030); FAD-binding domain (PF08022); Ferric reductase like transmembrane component (PF01794)
NCU04143	1.02499	0	protein phosphorylation (GO:0006468)	-	ATP binding (GO:0005524); protein kinase activity (GO:0004672)	Protein kinase domain (PF00069)
NCU06353	1.02755	0	-	-	-	5-formyltetrahydrofolate cyclo-ligase family (PF01812)
NCU04022	1.02807	0	-	-	-	C2H2 type zinc-finger (2 copies) (PF12756); Zinc-finger double-stranded RNA-binding (PF12171)
NCU03495	1.02837	0	-	-	catalytic activity (GO:0003824)	Protein phosphatase 2C (PF00481)
NCU08095	1.03176	0	-	-	-	-
NCU04648	1.03376	0	nitrogen compound metabolic process (GO:0006807)	-	hydrolase activity, acting on carbon-nitrogen (but not peptide) bonds (GO:0016810)	Carbon-nitrogen hydrolase (PF00795); NAD synthase (PF02540)
NCU00589	1.0356	0	transmembrane transport (GO:0055085)	integral component of membrane (GO:0016021)	-	Membrane transport protein (PF03547)
NCU07260	1.03843	0	-	-	-	Putative zinc-finger of transcription factor IIIC complex (PF12660); Transcription factor IIIC subunit delta N-term (PF12657)
NCU03780	1.03877	0	-	-	-	-
NCU09901	1.04148	0	-	-	nucleic acid binding (GO:0003676)	RNA recognition motif. (a.k.a. RRM, RBD, or RNP domain) (PF00076)
NCU03628	1.04241	0	rRNA processing (GO:0006364)	small-subunit processome (GO:0032040)	protein binding (GO:0005515)	Utp13 specific WD40 associated domain (PF08625); WD domain, G-beta repeat (PF00400)
NCU08166	1.04364	0	-	-	-	Mitochondrial calcium uniporter (PF04678)
NCU03952	1.04434	0	rRNA processing (GO:0006364)	nucleus (GO:0005634); Mpp10 complex (GO:0034457); small nucleolar ribonucleoprotein complex (GO:0005732)	-	Mpp10 protein (PF04006)
NCU01219	1.04478	0	cell redox homeostasis (GO:0045454)	-	electron transfer activity (GO:0009055); protein disulfide oxidoreductase activity (GO:0015035)	Glutaredoxin (PF00462)
NCU03981	1.0456	0	-	-	GTPase activity (GO:0003924); GTP binding (GO:0005525)	Elongation factor Tu GTP binding domain (PF00009); Elongation factor Tu C-terminal domain (PF03143); HBS1 N-terminus (PF08938)
NCU00080	1.04665	0	-	-	-	Protein of unknown function (DUF1295) (PF06966)
NCU07496	1.04789	0	-	-	protein binding (GO:0005515)	SET domain (PF00856)
NCU08563	1.05032	0	-	-	protein binding (GO:0005515)	F-box-like (PF12937); WD domain, G-beta repeat (PF00400)
NCU09821	1.05263	0	-	-	-	Enoyl-(Acyl carrier protein) reductase (PF13561)
NCU06668	1.05768	0	-	-	-	LIM domain (PF00412)
NCU00536	1.06201	0	-	-	-	alpha/beta hydrolase fold (PF00561)
NCU08158	1.06267	0	dephosphorylation (GO:0016311)	-	protein tyrosine/serine/threonine phosphatase activity (GO:0008138)	Dual specificity phosphatase, catalytic domain (PF00782)
NCU09658	1.06352	0	-	-	-	-
NCU09733	1.06389	0	-	-	-	Beta-glucosidase (SUN family) (PF03856)
NCU00431	1.06436	0	intracellular protein transport (GO:0006886)	mitochondrial outer membrane (GO:0005741)	-	Mitochondrial import receptor subunit Tom22 (PF04281)
NCU04450	1.06615	0	-	-	single-stranded DNA 5'-3' exodeoxyribonuclease activity (GO:0045145)	Exonuclease V - a 5' deoxyribonuclease (PF09810)
NCU03536	1.06724	0	regulation of transcription, DNA-templated (GO:0006355)	-	DNA-binding transcription factor activity (GO:0003700)	Basic region leucine zipper (PF07716)
NCU02513	1.06865	0	-	-	ADP-dependent NAD(P)H-hydrate dehydratase activity (GO:0052855)	Carbohydrate kinase (PF01256)
NCU04834	1.06935	0	protein-chromophore linkage (GO:0018298); detection of visible light (GO:0009584); signal transduction (GO:0007165); phosphorelay signal transduction system (GO:0000160); regulation of transcription, DNA-templated (GO:0006355)	-	phosphorelay sensor kinase activity (GO:0000155); protein binding (GO:0005515)	Phytochrome region (PF00360); GAF domain (PF01590); Response regulator receiver domain (PF00072); Histidine kinase-, DNA gyrase B-, and HSP90-like ATPase (PF02518); His Kinase A (phospho-acceptor) domain (PF00512)
NCU09896	1.07072	0	-	-	-	Adenylylsulphate kinase (PF01583)
NCU01658	1.07115	0	-	-	-	RAVE protein 1 C terminal (PF12234)
NCU03551	1.07142	0	-	-	-	-
NCU01522	1.07343	0	-	-	-	Chromo (CHRromatin Organisation MOdifier) domain (PF00385)
NCU05718	1.07807	0	-	-	-	Protein of unknown function (DUF3716) (PF12511)
NCU01637	1.07832	0	-	-	-	Protein of unknown function (DUF1115) (PF06544); pre-mRNA processing factor 3 (PRP3) (PF08572)
NCU07710	1.07838	0	intracellular signal transduction (GO:0035556)	-	-	Vacuolar membrane-associated protein Iml1 (PF12257); Domain found in Dishevelled, Egl-10, and Pleckstrin (DEP) (PF00610)
NCU00161	1.07972	0	-	-	-	-
NCU07058	1.08301	0	rRNA processing (GO:0006364)	small-subunit processome (GO:0032040)	-	Utp14 protein (PF04615)
NCU08600	1.08502	0	-	-	-	Yeast cortical protein KAR9 (PF08580)
NCU02887	1.08533	0	-	-	-	Aldo/keto reductase family (PF00248)
NCU03021	1.08767	0	-	-	-	Arrestin (or S-antigen), N-terminal domain (PF00339)
NCU05385	1.08831	0	mismatch repair (GO:0006298)	-	ATP binding (GO:0005524)	Histidine kinase-, DNA gyrase B-, and HSP90-like ATPase (PF13589); MutL C terminal dimerisation domain (PF08676)
NCU08728	1.0887	0	translation (GO:0006412)	ribosome (GO:0005840)	structural constituent of ribosome (GO:0003735)	Ribosomal protein S19 (PF00203)
NCU04576	1.08973	0	-	-	protein binding (GO:0005515)	F-box domain (PF00646)
NCU10506	1.09032	0	lipid metabolic process (GO:0006629)	-	-	Lipase (class 3) (PF01764)
NCU00359	1.09296	0	regulation of transcription, DNA-templated (GO:0006355)	-	-	YEATS family (PF03366)
NCU03393	1.0933	0	translation (GO:0006412)	intracellular (GO:0005622); ribosome (GO:0005840)	structural constituent of ribosome (GO:0003735)	Ribosomal protein S2 (PF00318)
NCU02406	1.09389	0	-	-	RNA binding (GO:0003723); protein binding (GO:0005515)	MIF4G domain (PF02854); MA3 domain (PF02847)
NCU09141	1.09399	0	-	-	-	Aldo/keto reductase family (PF00248)
NCU03120	1.09506	0	regulation of transcription, DNA-templated (GO:0006355)	nucleus (GO:0005634)	zinc ion binding (GO:0008270); RNA polymerase II transcription factor activity, sequence-specific DNA binding (GO:0000981)	Fungal Zn(2)-Cys(6) binuclear cluster domain (PF00172)
NCU05771	1.09553	0	-	-	-	Subunit 11 of the general transcription factor TFIIH (PF17110)
NCU04509	1.09604	0	-	-	-	HIT domain (PF01230)
NCU16646	1.09637	0	-	-	-	-
NCU05340	1.09698	0	oxidation-reduction process (GO:0055114)	-	oxidoreductase activity, acting on paired donors, with incorporation or reduction of molecular oxygen (GO:0016705)	Luciferase-like monooxygenase (PF00296)
NCU02499	1.09825	0	-	-	zinc ion binding (GO:0008270)	DNL zinc finger (PF05180)
NCU01888	1.0994	0	-	-	-	Cytidine and deoxycytidylate deaminase zinc-binding region (PF00383)
NCU09200	1.09949	0	-	-	-	-
NCU09220	1.09962	0	-	-	-	Trafficking protein Mon1 (PF03164)
NCU02430	1.09988	0	-	-	pyridoxal phosphate binding (GO:0030170)	Cys/Met metabolism PLP-dependent enzyme (PF01053)
NCU01753	1.10084	0	glutathione catabolic process (GO:0006751)	-	glutathione hydrolase activity (GO:0036374)	Gamma-glutamyltranspeptidase (PF01019)
NCU01997	1.10165	0	-	-	-	ABC1 family (PF03109)
NCU04040	1.10353	0	methylation (GO:0032259)	-	methyltransferase activity (GO:0008168)	FtsJ-like methyltransferase (PF01728)
NCU00198	1.1054	0	-	-	-	Tim10/DDP family zinc finger (PF02953)
NCU08032	1.10543	0	tRNA splicing, via endonucleolytic cleavage and ligation (GO:0006388)	-	tRNA-intron endonuclease activity (GO:0000213)	tRNA intron endonuclease, catalytic C-terminal domain (PF01974)
NCU02397	1.10571	0	-	-	thiamine pyrophosphate binding (GO:0030976); catalytic activity (GO:0003824); magnesium ion binding (GO:0000287)	Thiamine pyrophosphate enzyme, C-terminal TPP binding domain (PF02775); Thiamine pyrophosphate enzyme, central domain (PF00205); Thiamine pyrophosphate enzyme, N-terminal TPP binding domain (PF02776)
NCU04504	1.10648	0	-	-	ATP binding (GO:0005524); nucleic acid binding (GO:0003676)	Helicase conserved C-terminal domain (PF00271); DEAD/DEAH box helicase (PF00270)
NCU06609	1.11004	0	-	-	-	R3H-associated N-terminal domain (PF13902)
NCU06264	1.1126	0	DNA recombination (GO:0006310); DNA repair (GO:0006281)	-	DNA ligase (ATP) activity (GO:0003910); DNA binding (GO:0003677); ATP binding (GO:0005524)	BRCT domain, a BRCA1 C-terminus domain (PF16589); ATP dependent DNA ligase C terminal region (PF04679); ATP dependent DNA ligase domain (PF01068); DNA ligase N terminus (PF04675)
NCU11300	1.11364	0	-	anaphase-promoting complex (GO:0005680)	ubiquitin-protein transferase activity (GO:0004842)	Anaphase-promoting complex subunit 11 RING-H2 finger (PF12861)
NCU02934	1.11435	0	transcription, DNA-templated (GO:0006351); regulation of transcription, DNA-templated (GO:0006355)	nucleus (GO:0005634)	zinc ion binding (GO:0008270); DNA binding (GO:0003677); RNA polymerase II transcription factor activity, sequence-specific DNA binding (GO:0000981)	Fungal Zn(2)-Cys(6) binuclear cluster domain (PF00172); Fungal specific transcription factor domain (PF04082)
NCU07409	1.11582	0	-	-	-	-
NCU00368	1.11591	0	-	-	-	-
NCU07783	1.1163	0	-	-	-	Complex 1 protein (LYR family) (PF05347)
NCU03514	1.11706	0	-	-	-	-
NCU06332	1.11741	0	-	-	-	alpha/beta hydrolase fold (PF00561)
NCU03425	1.11753	0	-	-	-	Threonine synthase N terminus (PF14821); Pyridoxal-phosphate dependent enzyme (PF00291)
NCU03598	1.11759	0	-	-	-	Microfibril-associated/Pre-mRNA processing (PF06991)
NCU05695	1.11832	0	-	-	-	-
NCU06250	1.11837	0	-	-	protein binding (GO:0005515)	Leucine Rich repeat (PF13516); F-box-like (PF12937)
NCU00065	1.12051	0	tRNA processing (GO:0008033); oxidation-reduction process (GO:0055114)	-	flavin adenine dinucleotide binding (GO:0050660); tRNA dihydrouridine synthase activity (GO:0017150)	Dihydrouridine synthase (Dus) (PF01207)
NCU17258	1.12057	0	-	-	-	-
NCU08604	1.12533	0	-	-	-	-
NCU09894	1.12556	0	-	-	-	CBF/Mak21 family (PF03914)
NCU05587	1.12645	0	-	-	-	Actin (PF00022)
NCU02705	1.1273	0	-	-	-	ATP10 protein (PF05176)
NCU07010	1.12878	0	-	-	acid phosphatase activity (GO:0003993)	RimK-like ATP-grasp domain (PF08443); Histidine phosphatase superfamily (branch 2) (PF00328)
NCU02451	1.12909	0	-	-	-	Hypoxia induced protein conserved region (PF04588)
NCU09815	1.13329	0	base-excision repair (GO:0006284)	-	-	HhH-GPD superfamily base excision DNA repair protein (PF00730)
NCU16779	1.13858	0	-	-	-	Ribosome 60S biogenesis N-terminal (PF11707); Nucleolar pre-ribosomal-associated protein 1 (PF16201)
NCU02619	1.13946	0	tRNA processing (GO:0008033); oxidation-reduction process (GO:0055114)	-	flavin adenine dinucleotide binding (GO:0050660); tRNA dihydrouridine synthase activity (GO:0017150)	Dihydrouridine synthase (Dus) (PF01207)
NCU03065	1.14048	0	-	-	-	Rrp44-like cold shock domain (PF17216); PIN domain (PF13638); S1 domain (PF17215); RNB domain (PF00773)
NCU03079	1.1412	0	-	-	-	-
NCU00483	1.14385	0	-	-	zinc ion binding (GO:0008270); nucleic acid binding (GO:0003676)	Zinc knuckle (PF00098)
NCU06217	1.14412	0	-	-	nucleic acid binding (GO:0003676)	RNA recognition motif. (a.k.a. RRM, RBD, or RNP domain) (PF00076)
NCU09443	1.14679	0	transport (GO:0006810); transmembrane transport (GO:0055085)	integral component of membrane (GO:0016021)	ATPase activity, coupled to transmembrane movement of substances (GO:0042626); ATPase activity (GO:0016887); ATP binding (GO:0005524)	ABC transporter (PF00005); ABC transporter transmembrane region (PF00664)
NCU03961	1.14693	0	-	nucleus (GO:0005634)	-	NUC153 domain (PF08159)
NCU08858	1.14721	0	transmembrane transport (GO:0055085)	integral component of membrane (GO:0016021)	transmembrane transporter activity (GO:0022857)	Sugar (and other) transporter (PF00083)
NCU04176	1.14775	0	-	-	protein binding (GO:0005515)	WD domain, G-beta repeat (PF00400)
NCU03757	1.14964	0	translation (GO:0006412)	ribosome (GO:0005840)	structural constituent of ribosome (GO:0003735)	60S ribosomal protein L4 C-terminal domain (PF14374); Ribosomal protein L4/L1 family (PF00573)
NCU04133	1.1501	0	-	-	-	Peptidase family M28 (PF04389)
NCU10062	1.15069	0	-	-	-	Uncharacterised conserved protein (DUF2373) (PF10180)
NCU04474	1.15297	0	oxidation-reduction process (GO:0055114); nitrate assimilation (GO:0042128)	-	oxidoreductase activity (GO:0016491); molybdenum ion binding (GO:0030151)	Oxidoreductase molybdopterin binding domain (PF00174); Mo-co oxidoreductase dimerisation domain (PF03404)
NCU07661	1.15599	0	-	-	-	-
NCU07241	1.15962	0	-	-	-	Heterokaryon incompatibility protein (HET) (PF06985)
NCU02159	1.16265	0	-	-	nucleic acid binding (GO:0003676)	RNA recognition motif. (a.k.a. RRM, RBD, or RNP domain) (PF00076)
NCU07714	1.16497	0	-	-	-	-
NCU01419	1.16628	0	oxidation-reduction process (GO:0055114)	-	-	Zinc-binding dehydrogenase (PF00107); Alcohol dehydrogenase GroES-like domain (PF08240)
NCU09594	1.1672	0	tRNA aminoacylation for protein translation (GO:0006418)	-	aminoacyl-tRNA ligase activity (GO:0004812); nucleotide binding (GO:0000166); ATP binding (GO:0005524)	tRNA synthetase class II core domain (G, H, P, S and T) (PF00587); Seryl-tRNA synthetase N-terminal domain (PF02403)
NCU03123	1.16746	0	-	nucleus (GO:0005634)	histone binding (GO:0042393)	Centromere protein Scm3 (PF10384)
NCU16374	1.16828	0	-	-	-	Acylphosphatase (PF00708)
NCU09352	1.17043	0	-	-	RNA binding (GO:0003723)	KH domain (PF00013)
NCU04161	1.17078	0	transport (GO:0006810); transmembrane transport (GO:0055085)	integral component of membrane (GO:0016021)	ATPase activity, coupled to transmembrane movement of substances (GO:0042626); ATPase activity (GO:0016887); ATP binding (GO:0005524)	ABC transporter (PF00005); ABC transporter transmembrane region (PF00664)
NCU01584	1.1723	0	-	-	-	-
NCU09196	1.17237	0	-	-	-	-
NCU16751	1.17253	0	-	-	-	-
NCU04165	1.17318	0	-	-	-	Low temperature viability protein (PF04180)
NCU02528	1.17428	0	-	-	nucleic acid binding (GO:0003676)	G-patch domain (PF01585)
NCU10166	1.17593	0	protein peptidyl-prolyl isomerization (GO:0000413)	-	peptidyl-prolyl cis-trans isomerase activity (GO:0003755); nucleic acid binding (GO:0003676)	Cyclophilin type peptidyl-prolyl cis-trans isomerase/CLD (PF00160); RNA recognition motif. (a.k.a. RRM, RBD, or RNP domain) (PF00076)
NCU07934	1.17659	0	-	-	protein binding (GO:0005515)	Ankyrin repeats (3 copies) (PF12796); Ankyrin repeat (PF00023)
NCU01595	1.1783	0	-	-	protein binding (GO:0005515)	WD domain, G-beta repeat (PF00400); Sof1-like domain (PF04158)
NCU06090	1.1791	0	-	-	-	60S ribosome biogenesis protein Rrp14 (PF15459); Surfeit locus protein 6 (PF04935)
NCU03009	1.17922	0	-	-	-	Ribosome-associated complex head domain (PF16717); DnaJ domain (PF00226)
NCU03363	1.1808	0	-	-	ATP binding (GO:0005524); nucleic acid binding (GO:0003676)	DSHCT (NUC185) domain (PF08148); Helicase conserved C-terminal domain (PF00271); DEAD/DEAH box helicase (PF00270); rRNA-processing arch domain (PF13234)
NCU04789	1.18156	0	-	-	-	RanGTP-binding protein (PF05508)
NCU00115	1.18249	0	-	-	-	Fcf2 pre-rRNA processing (PF08698)
NCU07945	1.18346	0	transcription, DNA-templated (GO:0006351); regulation of transcription, DNA-templated (GO:0006355)	nucleus (GO:0005634)	zinc ion binding (GO:0008270); DNA binding (GO:0003677); RNA polymerase II transcription factor activity, sequence-specific DNA binding (GO:0000981)	Fungal Zn(2)-Cys(6) binuclear cluster domain (PF00172); Fungal specific transcription factor domain (PF04082)
NCU03445	1.18417	0	oxidation-reduction process (GO:0055114)	-	oxidoreductase activity (GO:0016491)	2OG-Fe(II) oxygenase superfamily (PF13640)
NCU00777	1.18538	0	metabolic process (GO:0008152)	-	methyltransferase activity (GO:0008168)	Methyltransferase involved in Williams-Beuren syndrome (PF12589); Methyltransferase domain (PF08241)
NCU07547	1.18708	0	ribosome biogenesis (GO:0042254)	intracellular (GO:0005622)	-	Ribosomal protein L10 (PF00466)
NCU09116	1.18714	0	biosynthetic process (GO:0009058)	-	pyridoxal phosphate binding (GO:0030170)	Aminotransferase class I and II (PF00155)
NCU05217	1.18859	0	-	-	-	Exonuclease (PF00929)
NCU10220	1.18932	0	-	-	-	AAA domain (PF13238)
NCU03670	1.19003	0	-	-	-	Cupin-like domain (PF13621)
NCU10225	1.19061	0	-	-	-	LETM1-like protein (PF07766)
NCU08165	1.1907	0	-	-	-	-
NCU09883	1.19179	0	-	-	-	-
NCU06542	1.19514	0	translation (GO:0006412)	intracellular (GO:0005622); ribosome (GO:0005840)	structural constituent of ribosome (GO:0003735)	Ribosomal protein S12/S23 (PF00164)
NCU11245	1.19964	0	-	-	-	DUF2407 ubiquitin-like domain (PF10302); DUF2407 C-terminal domain (PF13373)
NCU03816	1.20007	0	-	-	-	-
NCU05617	1.20085	0	-	-	-	-
NCU02401	1.20255	0	-	-	-	SGT1 protein (PF07093)
NCU03365	1.20298	0	-	-	-	HIT zinc finger (PF04438)
NCU03367	1.20536	0	-	-	-	Transcriptional repressor TCF25 (PF04910)
NCU05541	1.20686	0	-	-	-	Oxidoreductase-like protein, N-terminal (PF09791)
NCU00926	1.20715	0	-	-	-	RNA polymerase I specific transcription initiation factor (PF10680)
NCU09368	1.20826	0	transmembrane transport (GO:0055085); cation transport (GO:0006812)	integral component of membrane (GO:0016021)	cation transmembrane transporter activity (GO:0008324)	Dimerisation domain of Zinc Transporter (PF16916); Cation efflux family (PF01545)
NCU09442	1.20848	0	-	-	-	Polysaccharide biosynthesis (PF04669)
NCU01370	1.2092	0	DNA replication (GO:0006260)	nucleus (GO:0005634); origin recognition complex (GO:0000808)	-	Origin recognition complex subunit 2 (PF04084)
NCU03560	1.21216	0	transcription, DNA-templated (GO:0006351)	-	DNA binding (GO:0003677); DNA-directed 5'-3' RNA polymerase activity (GO:0003899)	RNA polymerase III subunit RPC82 (PF05645); RNA polymerase III subunit RPC82 helix-turn-helix domain (PF08221)
NCU08726	1.21328	0	regulation of transcription, DNA-templated (GO:0006355)	nucleus (GO:0005634)	zinc ion binding (GO:0008270); RNA polymerase II transcription factor activity, sequence-specific DNA binding (GO:0000981)	Fungal Zn(2)-Cys(6) binuclear cluster domain (PF00172)
NCU09191	1.21365	0	-	-	-	Domain of unknown function (DUF814) (PF05670); Fibronectin-binding protein A N-terminus (FbpA) (PF05833); Domain of unknown function (DUF3441) (PF11923)
NCU00784	1.21467	0	oxidation-reduction process (GO:0055114)	-	flavin adenine dinucleotide binding (GO:0050660); NADP binding (GO:0050661); N,N-dimethylaniline monooxygenase activity (GO:0004499)	Flavin-binding monooxygenase-like (PF00743)
NCU00331	1.21522	0	-	-	-	-
NCU02271	1.21527	0	-	-	-	Uncharacterised ACR, YagE family COG1723 (PF02582)
NCU11180	1.21639	0	lipid metabolic process (GO:0006629)	-	triglyceride lipase activity (GO:0004806)	Patatin-like phospholipase (PF01734); Domain of unknown function (DUF3336) (PF11815)
NCU00155	1.21957	0	transcription, DNA-templated (GO:0006351); regulation of transcription, DNA-templated (GO:0006355)	nucleus (GO:0005634)	zinc ion binding (GO:0008270); DNA binding (GO:0003677); RNA polymerase II transcription factor activity, sequence-specific DNA binding (GO:0000981)	Fungal Zn(2)-Cys(6) binuclear cluster domain (PF00172); Fungal specific transcription factor domain (PF04082)
NCU07860	1.22245	0	carbohydrate metabolic process (GO:0005975)	-	catalytic activity (GO:0003824)	Alpha amylase, catalytic domain (PF00128); Domain of unknown function (DUF3459) (PF11941)
NCU04266	1.22358	0	-	-	-	-
NCU02101	1.22423	0	-	-	-	-
NCU08825	1.22568	0	-	-	-	NUBPL iron-transfer P-loop NTPase (PF10609)
NCU00180	1.22571	0	regulation of transcription, DNA-templated (GO:0006355)	nucleus (GO:0005634)	zinc ion binding (GO:0008270); RNA polymerase II transcription factor activity, sequence-specific DNA binding (GO:0000981)	Fungal Zn(2)-Cys(6) binuclear cluster domain (PF00172)
NCU09887	1.22953	0	-	-	-	Triose-phosphate Transporter family (PF03151)
NCU05537	1.22955	0	metabolic process (GO:0008152); aromatic amino acid family metabolic process (GO:0009072)	-	fumarylacetoacetase activity (GO:0004334); catalytic activity (GO:0003824)	Fumarylacetoacetate (FAA) hydrolase family (PF01557); Fumarylacetoacetase N-terminal (PF09298)
NCU07824	1.23086	0	mitochondrion organization (GO:0007005)	ERMES complex (GO:0032865)	-	Mitochondrial distribution and morphology protein 10 (PF12519)
NCU06780	1.233	0	RNA processing (GO:0006396)	-	RNA methyltransferase activity (GO:0008173)	tRNA (Uracil-5-)-methyltransferase (PF05958)
NCU06227	1.2334	0	-	-	rRNA (adenine) methyltransferase activity (GO:0016433)	25S rRNA (adenine(2142)-N(1))-methyltransferase, Bmt2 (PF11968)
NCU02277	1.23745	0	-	-	-	VanZ like family (PF04892)
NCU01357	1.23894	0	-	plasma membrane (GO:0005886)	-	SUR7/PalI family (PF06687)
NCU07119	1.23933	0	metabolic process (GO:0008152)	-	catalytic activity (GO:0003824)	Phosphopantetheine attachment site (PF00550); Condensation domain (PF00668); AMP-binding enzyme (PF00501)
NCU07808	1.2394	0	-	-	-	Antibiotic biosynthesis monooxygenase (PF03992)
NCU04177	1.24195	0	tRNA thio-modification (GO:0034227)	cytoplasm (GO:0005737)	-	Urm1 (Ubiquitin related modifier) (PF09138)
NCU08298	1.24203	0	phospholipid catabolic process (GO:0009395)	-	phospholipase activity (GO:0004620)	Lysophospholipase catalytic domain (PF01735)
NCU10264	1.24539	0	-	-	-	WSC domain (PF01822); PAN domain (PF14295)
NCU04347	1.24547	0	-	-	iron-sulfur cluster binding (GO:0051536); catalytic activity (GO:0003824)	Radical SAM superfamily (PF04055)
NCU09629	1.24571	0	-	-	-	Heterokaryon incompatibility protein (HET) (PF06985)
NCU11261	1.24704	0	-	-	-	Las1-like (PF04031)
NCU01230	1.24889	0	-	-	-	-
NCU07157	1.24892	0	-	-	-	TFIIIC subunit (PF10419)
NCU01803	1.25078	0	protein arginylation (GO:0016598)	-	arginyltransferase activity (GO:0004057)	Arginine-tRNA-protein transferase, N terminus (PF04376); Arginine-tRNA-protein transferase, C terminus (PF04377)
NCU00188	1.25151	0	protein phosphorylation (GO:0006468)	-	ATP binding (GO:0005524); protein serine/threonine kinase activity (GO:0004674); protein kinase activity (GO:0004672)	Protein kinase domain (PF00069); Domain of unknown function (DUF3543) (PF12063)
NCU06489	1.25228	0	-	-	protein binding (GO:0005515)	WD domain, G-beta repeat (PF00400)
NCU11341	1.25311	0	cellular metabolic process (GO:0044237)	-	hydrolase activity (GO:0016787)	NUDIX domain (PF00293); Initiation factor 2 subunit family (PF01008)
NCU00409	1.25388	0	L-phenylalanine biosynthetic process (GO:0009094)	-	prephenate dehydratase activity (GO:0004664)	Prephenate dehydratase (PF00800)
NCU07521	1.25424	0	-	-	protein binding (GO:0005515)	F-box-like (PF12937); WD domain, G-beta repeat (PF00400)
NCU09349	1.25562	0	-	-	ATP binding (GO:0005524); nucleic acid binding (GO:0003676)	Helicase conserved C-terminal domain (PF00271); DEAD/DEAH box helicase (PF00270); Domain of unknown function (DUF4217) (PF13959)
NCU07996	1.25563	0	-	-	protein binding (GO:0005515)	Ubiquitin interaction motif (PF02809); F-box-like (PF12937)
NCU02317	1.25682	0	-	-	-	Stress responsive A/B Barrel Domain (PF07876)
NCU04249	1.25786	0	-	-	-	Protein of unknown function (DUF3602) (PF12223)
NCU10314	1.25873	0	transmembrane transport (GO:0055085)	integral component of membrane (GO:0016021)	-	Major Facilitator Superfamily (PF07690)
NCU09581	1.26091	0	-	-	-	-
NCU03380	1.26116	0	-	-	ATP binding (GO:0005524); nucleic acid binding (GO:0003676)	Helicase conserved C-terminal domain (PF00271); DEAD/DEAH box helicase (PF00270); Domain of unknown function (DUF4217) (PF13959)
NCU07774	1.26149	0	-	-	-	GTP cyclohydrolase I (PF01227)
NCU00275	1.263	0	-	-	-	Zinc finger, C3HC4 type (RING finger) (PF13920)
NCU00077	1.2631	0	double-strand break repair via nonhomologous end joining (GO:0006303)	-	hydrolase activity, acting on acid anhydrides (GO:0016817); DNA binding (GO:0003677)	Ku70/Ku80 N-terminal alpha/beta domain (PF03731); Ku C terminal domain like (PF08785); Ku70/Ku80 beta-barrel domain (PF02735)
NCU05233	1.26372	0	-	-	-	Nop53 (60S ribosomal biogenesis) (PF07767)
NCU04047	1.26424	0	-	-	-	SRP40, C-terminal domain (PF05022)
NCU01115	1.26614	0	tRNA splicing, via endonucleolytic cleavage and ligation (GO:0006388)	-	tRNA-intron endonuclease activity (GO:0000213)	tRNA intron endonuclease, catalytic C-terminal domain (PF01974)
NCU01524	1.26658	0	-	-	-	Brix domain (PF04427)
NCU16757	1.2666	0	ribosome biogenesis (GO:0042254); pseudouridine synthesis (GO:0001522)	-	-	Gar1/Naf1 RNA binding region (PF04410)
NCU02067	1.26678	0	-	-	-	-
NCU06020	1.26712	0	carbohydrate metabolic process (GO:0005975)	-	-	Glycosyl hydrolases family 18 (PF00704)
NCU06118	1.2679	0	-	-	-	-
NCU01447	1.26864	0	-	-	-	Transcription elongation factor Elf1 like (PF05129)
NCU05652	1.26905	0	-	-	-	-
NCU06331	1.26958	0	-	-	-	Spo7-like protein (PF03907)
NCU10143	1.27161	0	cation transport (GO:0006812)	integral component of membrane (GO:0016021)	ATPase activity (GO:0016887)	E1-E2 ATPase (PF00122); P5-type ATPase cation transporter (PF12409)
NCU02434	1.27171	0	-	-	nucleic acid binding (GO:0003676)	R3H domain (PF01424); G-patch domain (PF01585)
NCU03159	1.27307	0	-	-	-	3' exoribonuclease family, domain 1 (PF01138)
NCU01260	1.27324	0	-	-	-	B-block binding subunit of TFIIIC (PF04182)
NCU00641	1.27417	0	-	mitochondrial membrane (GO:0031966)	-	Cytochrome c oxidase assembly protein COX16 (PF14138)
NCU01632	1.27586	0	oxidation-reduction process (GO:0055114)	-	shikimate 3-dehydrogenase (NADP+) activity (GO:0004764); transferase activity, transferring alkyl or aryl (other than methyl) groups (GO:0016765); 3-dehydroquinate dehydratase activity (GO:0003855)	EPSP synthase (3-phosphoshikimate 1-carboxyvinyltransferase) (PF00275); Type I 3-dehydroquinase (PF01487); Shikimate / quinate 5-dehydrogenase (PF01488); Shikimate dehydrogenase substrate binding domain (PF08501); 3-dehydroquinate synthase (PF01761); Shikimate kinase (PF01202)
NCU01330	1.27721	0	-	-	phosphoric ester hydrolase activity (GO:0042578)	Inositol phosphatase (PF12456); SacI homology domain (PF02383)
NCU04181	1.27805	0	protein import into mitochondrial matrix (GO:0030150)	mitochondrial outer membrane translocase complex (GO:0005742)	-	TOM7 family (PF08038)
NCU03544	1.27882	0	-	-	-	-
NCU05289	1.27914	0	-	-	GTP binding (GO:0005525)	Nucleolar GTP-binding protein 1 (NOG1) (PF06858); NOGCT (NUC087) domain (PF08155)
NCU00884	1.27921	0	-	-	coenzyme binding (GO:0050662); catalytic activity (GO:0003824)	NAD dependent epimerase/dehydratase family (PF01370)
NCU08951	1.28128	0	-	-	-	Ribosomal protein L7Ae/L30e/S12e/Gadd45 family (PF01248)
NCU07670	1.28457	0	-	-	ATP binding (GO:0005524); nucleic acid binding (GO:0003676)	Helicase conserved C-terminal domain (PF00271); DEAD/DEAH box helicase (PF00270)
NCU05535	1.2853	0	-	-	-	short chain dehydrogenase (PF00106)
NCU04507	1.28799	0	-	-	-	Conserved hypothetical ATP binding protein (PF03029)
NCU00729	1.28867	0	-	-	-	Ser-Thr-rich glycosyl-phosphatidyl-inositol-anchored membrane family (PF10342)
NCU06445	1.28877	0	-	-	-	Neurochondrin (PF05536)
NCU02633	1.28896	0	-	-	nucleic acid binding (GO:0003676)	RNA recognition motif. (a.k.a. RRM, RBD, or RNP domain) (PF00076)
NCU01809	1.29658	0	-	-	ATP binding (GO:0005524)	ATPase family associated with various cellular activities (AAA) (PF00004)
NCU06611	1.29926	0	-	-	-	-
NCU04844	1.29988	0	-	-	-	Conserved hypothetical protein (DUF2461) (PF09365)
NCU00293	1.30256	0	-	-	metal ion binding (GO:0046872); hydrolase activity (GO:0016787)	NADH pyrophosphatase-like rudimentary NUDIX domain (PF09296); NADH pyrophosphatase zinc ribbon domain (PF09297); NUDIX domain (PF00293)
NCU04407	1.30294	0	-	-	-	Putative RNA methylase family UPF0020 (PF01170)
NCU06468	1.30613	0	-	-	ATPase activity (GO:0016887); ATP binding (GO:0005524)	AAA domain (dynein-related subfamily) (PF07728)
NCU02773	1.30614	0	-	-	-	Protein of unknown function (DUF3602) (PF12223)
NCU06632	1.3065	0	protein targeting (GO:0006605); intracellular protein transport (GO:0006886)	mitochondrial outer membrane translocase complex (GO:0005742)	-	MAS20 protein import receptor (PF02064)
NCU05968	1.30659	0	-	-	-	-
NCU05560	1.30777	0	-	-	-	PX-associated (PF12828); Domain of unknown function in PX-proteins (DUF3818) (PF12825)
NCU06104	1.31079	0	-	-	-	Possible Fer4-like domain in RNase L inhibitor, RLI (PF04068); Ribosome biogenesis protein, C-terminal (PF04034)
NCU00238	1.31408	0	-	-	-	-
NCU01345	1.3165	0	regulation of transcription, DNA-templated (GO:0006355)	-	DNA-binding transcription factor activity (GO:0003700)	Aft1 HRR domain (PF11787); Aft1 osmotic stress response (OSM) domain (PF11785); Aft1 HRA domain (PF11786); bZIP transcription factor (PF00170)
NCU05540	1.31751	0	-	-	-	-
NCU00930	1.31877	0	-	-	-	Tim10/DDP family zinc finger (PF02953)
NCU07715	1.31993	0	-	-	-	-
NCU01785	1.32087	0	transcription, DNA-templated (GO:0006351)	-	DNA-directed 5'-3' RNA polymerase activity (GO:0003899)	RNA polymerase Rpb4 (PF03874)
NCU04620	1.32154	0	-	-	-	-
NCU04585	1.32369	0	-	-	phosphatidylinositol binding (GO:0035091)	PXA domain (PF02194); PX domain (PF00787); Sorting nexin C terminal (PF08628)
NCU02494	1.32446	0	-	-	-	Down-regulated in metastasis (PF07539)
NCU04695	1.32455	0	-	-	-	Methyltransferase domain (PF13847)
NCU06281	1.32892	0	-	-	-	Cation transport ATPase (P-type) (PF13246); Phospholipid-translocating ATPase N-terminal (PF16209); Phospholipid-translocating P-type ATPase C-terminal (PF16212); E1-E2 ATPase (PF00122)
NCU08712	1.32979	0	-	-	-	Domain of unknown function (DUF1992) (PF09350)
NCU08559	1.32989	0	-	-	-	-
NCU00710	1.33225	0	carbohydrate metabolic process (GO:0005975)	extracellular region (GO:0005576)	hydrolase activity (GO:0016787); cellulose binding (GO:0030248)	Fungal cellulose binding domain (PF00734); Esterase PHB depolymerase (PF10503)
NCU07007	1.33415	0	transcription, DNA-templated (GO:0006351); regulation of transcription, DNA-templated (GO:0006355)	nucleus (GO:0005634)	zinc ion binding (GO:0008270); DNA binding (GO:0003677); RNA polymerase II transcription factor activity, sequence-specific DNA binding (GO:0000981)	Fungal Zn(2)-Cys(6) binuclear cluster domain (PF00172); Fungal specific transcription factor domain (PF04082)
NCU01022	1.33696	0	-	nucleus (GO:0005634)	-	Utp25, U3 small nucleolar RNA-associated SSU processome protein 25 (PF06862)
NCU07871	1.3377	0	-	-	-	PPR repeat family (PF13041)
NCU08968	1.34029	0	-	-	-	Ribosomal RNA adenine dimethylase (PF00398)
NCU16778	1.34141	0	-	-	-	Chromosome segregation during meiosis (PF13889)
NCU00301	1.34237	0	-	-	-	Sas10/Utp3/C1D family (PF04000); Sas10 C-terminal domain (PF09368)
NCU01506	1.34311	0	-	-	-	Neugrin (PF06413)
NCU00925	1.34507	0	ribosome biogenesis (GO:0042254)	nucleolus (GO:0005730)	-	Pescadillo N-terminus (PF06732)
NCU01301	1.34674	0	-	-	-	-
NCU02802	1.34721	0	-	-	-	Mitochondrial carrier protein (PF00153)
NCU00232	1.34803	0	tRNA processing (GO:0008033)	-	-	Metallo-beta-lactamase superfamily (PF00753); tRNase Z endonuclease (PF13691)
NCU07925	1.3486	0	-	-	-	Macro domain (PF01661)
NCU08688	1.34946	0	-	-	-	Tti2 family (PF10521)
NCU01015	1.35033	0	-	-	-	Pentatricopeptide repeat domain (PF13812)
NCU01679	1.35047	0	-	-	-	-
NCU06107	1.35549	0	-	-	-	BolA-like protein (PF01722)
NCU02540	1.35664	0	-	-	-	Eisosome component PIL1 (PF13805)
NCU01490	1.35772	0	-	-	-	AKAP7 2'5' RNA ligase-like domain (PF10469)
NCU06496	1.35789	0	-	-	-	Urb2/Npa2 family (PF10441)
NCU04418	1.35819	0	transmembrane transport (GO:0055085)	integral component of membrane (GO:0016021)	-	Major Facilitator Superfamily (PF07690)
NCU07911	1.35843	0	-	-	-	Protein of unknown function (DUF3808) (PF10300)
NCU00092	1.35996	0	rRNA processing (GO:0006364)	-	-	rRNA-processing protein Efg1 (PF10153)
NCU09380	1.36005	0	-	-	RNA binding (GO:0003723)	CPL (NUC119) domain (PF08144)
NCU09137	1.36069	0	-	-	-	-
NCU06352	1.36761	0	transmembrane transport (GO:0055085)	-	-	OPT oligopeptide transporter protein (PF03169)
NCU05817	1.37	0	-	-	-	-
NCU03423	1.37172	0	-	-	-	-
NCU07699	1.37219	0	mRNA processing (GO:0006397)	-	metal ion binding (GO:0046872); nucleic acid binding (GO:0003676)	RNA recognition motif. (a.k.a. RRM, RBD, or RNP domain) (PF00076); Zinc finger C-x8-C-x5-C-x3-H type (and similar) (PF00642); PWI domain (PF01480)
NCU05894	1.37328	0	maturation of SSU-rRNA from tricistronic rRNA transcript (SSU-rRNA, 5.8S rRNA, LSU-rRNA) (GO:0000462)	-	snoRNA binding (GO:0030515)	U3 small nucleolar RNA-associated protein 6 (PF08640)
NCU07557	1.37633	0	-	-	-	-
NCU05784	1.37758	0	-	-	-	-
NCU06068	1.37765	0	transcription, DNA-templated (GO:0006351); regulation of transcription, DNA-templated (GO:0006355)	nucleus (GO:0005634)	zinc ion binding (GO:0008270); DNA binding (GO:0003677); RNA polymerase II transcription factor activity, sequence-specific DNA binding (GO:0000981)	Fungal Zn(2)-Cys(6) binuclear cluster domain (PF00172); Fungal specific transcription factor domain (PF04082)
NCU02589	1.378	0	-	-	-	Domain of unknown function (DUF3835) (PF12927); Prefoldin subunit (PF13758)
NCU06246	1.37961	0	-	-	ATP binding (GO:0005524); nucleic acid binding (GO:0003676)	Helicase conserved C-terminal domain (PF00271); DEAD/DEAH box helicase (PF00270)
NCU02674	1.38101	0	-	-	-	-
NCU01542	1.38483	0	-	-	-	HbrB-like (PF08539)
NCU04201	1.38717	0	-	integral component of membrane (GO:0016021)	-	SPX domain (PF03105); EXS family (PF03124)
NCU08031	1.38794	0	tRNA wobble uridine modification (GO:0002098)	Elongator holoenzyme complex (GO:0033588)	-	PAXNEB protein (PF05625)
NCU09595	1.38838	0	transmembrane transport (GO:0055085)	membrane (GO:0016020)	-	Mechanosensitive ion channel (PF00924)
NCU03149	1.39003	0	RNA processing (GO:0006396)	-	adenosine deaminase activity (GO:0004000); RNA binding (GO:0003723)	Adenosine-deaminase (editase) domain (PF02137)
NCU02237	1.39045	0	-	-	-	mRNA cleavage and polyadenylation factor CLP1 P-loop (PF16575)
NCU05838	1.3922	0	-	-	-	Protein of unknown function (DUF3429) (PF11911)
NCU03112	1.39407	0	oxidation-reduction process (GO:0055114)	-	oxidoreductase activity (GO:0016491)	Oxidoreductase FAD-binding domain (PF00970); Oxidoreductase NAD-binding domain (PF00175)
NCU03657	1.39539	0	-	-	-	Glycosyl hydrolase family 63 N-terminal domain (PF16923); Glycosyl hydrolase family 63 C-terminal domain (PF03200)
NCU03794	1.3975	0	-	-	protein binding (GO:0005515)	WD domain, G-beta repeat (PF00400); Dip2/Utp12 Family (PF04003)
NCU07578	1.39797	0	-	-	-	Mitochondrial carrier protein (PF00153)
NCU01321	1.39928	0	-	nucleus (GO:0005634)	DNA polymerase activity (GO:0034061); DNA binding (GO:0003677)	DNA polymerase beta thumb (PF14791); DNA polymerase beta palm (PF14792); Fingers domain of DNA polymerase lambda (PF10391); Helix-hairpin-helix domain (PF14716)
NCU04439	1.40236	0	-	-	ATP binding (GO:0005524); nucleic acid binding (GO:0003676)	Helicase conserved C-terminal domain (PF00271); DEAD/DEAH box helicase (PF00270); Domain of unknown function (DUF4217) (PF13959)
NCU06985	1.40465	0	-	-	-	-
NCU02147	1.40693	0	-	-	-	Ankyrin repeats (many copies) (PF13857)
NCU09440	1.40942	0	-	-	-	-
NCU02511	1.40942	0	-	-	methyltransferase activity (GO:0008168)	16S rRNA methyltransferase RsmB/F (PF01189); N-terminal domain of 16S rRNA methyltransferase RsmF (PF17125)
NCU05029	1.41041	0	transport (GO:0006810); transmembrane transport (GO:0055085)	integral component of membrane (GO:0016021)	ATPase activity, coupled to transmembrane movement of substances (GO:0042626); ATPase activity (GO:0016887); ATP binding (GO:0005524)	ABC transporter (PF00005); ABC transporter transmembrane region (PF00664)
NCU01121	1.41076	0	-	-	-	Ankyrin repeats (many copies) (PF13637)
NCU02535	1.41262	0	-	-	-	-
NCU00814	1.41452	0	-	-	-	Vta1 like (PF04652)
NCU07401	1.41631	0	-	-	-	Domain of unknown function (DUF202) (PF02656)
NCU00794	1.41842	0	-	-	protein binding (GO:0005515)	WD domain, G-beta repeat (PF00400)
NCU00892	1.41889	0	-	-	-	-
NCU04041	1.4189	0	-	-	ATP binding (GO:0005524); nucleic acid binding (GO:0003676)	Helicase conserved C-terminal domain (PF00271); DEAD/DEAH box helicase (PF00270)
NCU04348	1.42112	0	ribosome biogenesis (GO:0042254)	nucleus (GO:0005634)	-	40S ribosome biogenesis protein Tsr1 and BMS1 C-terminal (PF04950); AARP2CN (NUC121) domain (PF08142)
NCU09794	1.42397	0	-	-	oxidoreductase activity (GO:0016491)	Oxidoreductase family, NAD-binding Rossmann fold (PF01408)
NCU00847	1.42425	0	-	-	-	-
NCU06449	1.42649	0	transmembrane transport (GO:0055085); cation transport (GO:0006812)	-	cation transmembrane transporter activity (GO:0008324)	Cation transport protein (PF02386)
NCU03764	1.42754	0	-	-	protein binding (GO:0005515)	NLE (NUC135) domain (PF08154); WD domain, G-beta repeat (PF00400)
NCU17083	1.43085	0	-	-	-	Beta-lactamase superfamily domain (PF12706)
NCU04823	1.43412	0	oxidation-reduction process (GO:0055114)	-	-	Zinc-binding dehydrogenase (PF00107); Alcohol dehydrogenase GroES-like domain (PF08240)
NCU04662	1.43575	0	autophagy (GO:0006914)	cytoplasm (GO:0005737)	-	Autophagy protein Apg5 (PF04106)
NCU17008	1.44021	0	-	-	-	Small acidic protein family (PF15477)
NCU02996	1.44363	0	-	-	hydrolase activity (GO:0016787)	Calcineurin-like phosphoesterase (PF00149)
NCU05984	1.44753	0	base-excision repair (GO:0006284); nucleotide-excision repair (GO:0006289)	-	zinc ion binding (GO:0008270); hydrolase activity, hydrolyzing N-glycosyl compounds (GO:0016799); DNA-(apurinic or apyrimidinic site) endonuclease activity (GO:0003906); damaged DNA binding (GO:0003684)	Formamidopyrimidine-DNA glycosylase N-terminal domain (PF01149); Formamidopyrimidine-DNA glycosylase H2TH domain (PF06831)
NCU08996	1.44853	0	-	-	-	-
NCU10020	1.4489	0	methionine biosynthetic process (GO:0009086)	-	zinc ion binding (GO:0008270); 5-methyltetrahydropteroyltriglutamate-homocysteine S-methyltransferase activity (GO:0003871)	Cobalamin-independent synthase, Catalytic domain (PF01717)
NCU12121	1.44898	0	-	-	-	-
NCU07720	1.4499	0	drug transmembrane transport (GO:0006855); transmembrane transport (GO:0055085)	membrane (GO:0016020)	antiporter activity (GO:0015297); drug transmembrane transporter activity (GO:0015238)	MatE (PF01554)
NCU06383	1.45052	0	amino sugar metabolic process (GO:0006040); peptidoglycan turnover (GO:0009254)	-	phosphotransferase activity, alcohol group as acceptor (GO:0016773); ATP binding (GO:0005524)	Anhydro-N-acetylmuramic acid kinase (PF03702)
NCU06520	1.45627	0	-	-	ATP binding (GO:0005524); nucleic acid binding (GO:0003676)	Helicase conserved C-terminal domain (PF00271); DEAD/DEAH box helicase (PF00270); Domain of unknown function (DUF4217) (PF13959)
NCU01612	1.4564	0	-	-	ATP binding (GO:0005524); helicase activity (GO:0004386); nucleic acid binding (GO:0003676)	Oligonucleotide/oligosaccharide-binding (OB)-fold (PF07717); Helicase conserved C-terminal domain (PF00271); Helicase associated domain (HA2) (PF04408); DEAD/DEAH box helicase (PF00270)
NCU07495	1.45792	0	-	-	-	Eisosome component PIL1 (PF13805)
NCU03964	1.45794	0	-	-	-	Spinocerebellar ataxia type 10 protein domain (PF09759)
NCU06931	1.46135	0	oxidation-reduction process (GO:0055114); nitrate assimilation (GO:0042128)	-	oxidoreductase activity (GO:0016491); molybdenum ion binding (GO:0030151)	Cytochrome b5-like Heme/Steroid binding domain (PF00173); Oxidoreductase molybdopterin binding domain (PF00174); Mo-co oxidoreductase dimerisation domain (PF03404)
NCU07349	1.46156	0	-	-	-	-
NCU07011	1.46161	0	rRNA processing (GO:0006364)	small-subunit processome (GO:0032040)	protein binding (GO:0005515)	WD domain, G-beta repeat (PF00400); Utp21 specific WD40 associated putative domain (PF04192)
NCU00308	1.46227	0	-	-	-	-
NCU04008	1.46306	0	-	-	ATP binding (GO:0005524)	AFG1-like ATPase (PF03969)
NCU02267	1.46319	0	-	-	-	Regulator of chromosome condensation (RCC1) repeat (PF13540); Regulator of chromosome condensation (RCC1) repeat (PF00415)
NCU00203	1.46787	0	-	-	NAD+ binding (GO:0070403)	Sir2 family (PF02146)
NCU03617	1.46923	0	-	-	-	Haloacid dehalogenase-like hydrolase (PF13419)
NCU00426	1.46943	0	-	-	-	Metallo-beta-lactamase superfamily (PF00753)
NCU02066	1.46944	0	-	-	-	Noc2p family (PF03715)
NCU04455	1.46945	0	ribosome biogenesis (GO:0042254); pseudouridine synthesis (GO:0001522)	-	-	Gar1/Naf1 RNA binding region (PF04410)
NCU03339	1.46959	0	oxidation-reduction process (GO:0055114); cell redox homeostasis (GO:0045454)	-	oxidoreductase activity (GO:0016491)	Pyridine nucleotide-disulphide oxidoreductase (PF07992); Pyridine nucleotide-disulphide oxidoreductase, dimerisation domain (PF02852)
NCU16771	1.47092	0	tRNA processing (GO:0008033)	-	ribonuclease activity (GO:0004540)	Rpp14/Pop5 family (PF01900)
NCU06485	1.47152	0	transcription, DNA-templated (GO:0006351)	nucleus (GO:0005634)	DNA binding (GO:0003677); DNA-directed 5'-3' RNA polymerase activity (GO:0003899)	A49-like RNA polymerase I associated factor (PF06870)
NCU03195	1.47286	0	tRNA processing (GO:0008033); oxidation-reduction process (GO:0055114)	-	flavin adenine dinucleotide binding (GO:0050660); tRNA dihydrouridine synthase activity (GO:0017150)	Dihydrouridine synthase (Dus) (PF01207)
NCU07381	1.47289	0	-	-	-	DNA repair metallo-beta-lactamase (PF07522)
NCU02603	1.47314	0	oxidation-reduction process (GO:0055114)	-	oxidoreductase activity (GO:0016491)	2OG-Fe(II) oxygenase superfamily (PF03171); non-haem dioxygenase in morphine synthesis N-terminal (PF14226)
NCU03417	1.47769	0	transcription, DNA-templated (GO:0006351); regulation of transcription, DNA-templated (GO:0006355)	nucleus (GO:0005634)	zinc ion binding (GO:0008270); DNA binding (GO:0003677); RNA polymerase II transcription factor activity, sequence-specific DNA binding (GO:0000981)	Fungal Zn(2)-Cys(6) binuclear cluster domain (PF00172); Fungal specific transcription factor domain (PF04082)
NCU05721	1.48179	0	-	-	-	Arrestin (or S-antigen), C-terminal domain (PF02752)
NCU06850	1.48614	0	-	-	-	Glucanosyltransferase (PF03198)
NCU08421	1.48662	0	-	-	-	Dip2/Utp12 Family (PF04003)
NCU02420	1.48918	0	-	-	ATP binding (GO:0005524)	Vps4 C terminal oligomerisation domain (PF09336); ATPase family associated with various cellular activities (AAA) (PF00004)
NCU09973	1.49112	0	-	-	-	Zinc-finger double-stranded RNA-binding (PF12171)
NCU03147	1.49274	0	-	-	-	CBP4 (PF07960)
NCU06069	1.49293	0	-	-	-	-
NCU06505	1.49382	0	-	-	-	Beta-1,3-glucanase (PF16483)
NCU02172	1.4944	0	-	-	-	-
NCU07331	1.49457	0	-	-	-	Sas10/Utp3/C1D family (PF04000)
NCU06927	1.49484	0	-	-	-	Alpha/beta hydrolase family (PF12697)
NCU01063	1.49621	0	-	-	-	Alternaria alternata allergen 1 (PF16541)
NCU02959	1.4973	0	-	-	-	-
NCU08324	1.49814	0	-	-	-	Domain of unknown function (DUF384) (PF04064); Domain of unknown function (DUF383) (PF04063)
NCU09540	1.49876	0	-	-	-	Methyltransferase domain (PF13679)
NCU08658	1.50344	0	-	-	-	-
NCU02438	1.50654	0	metabolic process (GO:0008152)	-	transferase activity, transferring acyl groups (GO:0016746)	2-oxoacid dehydrogenases acyltransferase (catalytic domain) (PF00198); Biotin-requiring enzyme (PF00364)
NCU00069	1.50935	0	-	-	-	-
NCU08307	1.50936	0	regulation of transcription, DNA-templated (GO:0006355)	nucleus (GO:0005634)	zinc ion binding (GO:0008270); RNA polymerase II transcription factor activity, sequence-specific DNA binding (GO:0000981)	Fungal Zn(2)-Cys(6) binuclear cluster domain (PF00172)
NCU05235	1.51094	0	-	-	-	Ribosomal protein L24e (PF01246)
NCU07899	1.51435	0	-	-	catalytic activity (GO:0003824)	CoA-transferase family III (PF02515)
NCU00125	1.51565	0	-	-	-	Whi5 like (PF08528)
NCU03001	1.5191	0	-	-	-	Regulator of chromosome condensation (RCC1) repeat (PF13540)
NCU08323	1.52168	0	-	-	-	Bystin (PF05291)
NCU02395	1.52295	0	tetrapyrrole biosynthetic process (GO:0033014)	-	uroporphyrinogen-III synthase activity (GO:0004852)	Uroporphyrinogen-III synthase HemD (PF02602)
NCU06150	1.52359	0	-	-	-	DnaJ domain (PF00226)
NCU08965	1.52608	0	-	-	-	-
NCU09293	1.52631	0	-	-	-	-
NCU05635	1.52634	0	-	-	DNA binding (GO:0003677)	Complex 1 protein (LYR family) (PF05347); AT hook motif (PF02178)
NCU00766	1.52643	0	-	-	-	-
NCU08938	1.52751	0	base-excision repair (GO:0006284)	-	-	HhH-GPD superfamily base excision DNA repair protein (PF00730)
NCU09843	1.529	0	rRNA processing (GO:0006364)	nucleolus (GO:0005730)	protein binding (GO:0005515)	UTP15 C terminal (PF09384); WD domain, G-beta repeat (PF00400)
NCU03761	1.53568	0	-	-	-	Pyridoxal-phosphate dependent enzyme (PF00291)
NCU09195	1.53761	0	-	-	-	PQ loop repeat (PF04193)
NCU03051	1.53769	0	-	-	protein binding (GO:0005515)	WD domain, G-beta repeat (PF00400); Dip2/Utp12 Family (PF04003)
NCU06597	1.53814	0	-	-	-	-
NCU00310	1.54119	0	-	-	-	Tetratricopeptide repeat (PF13432)
NCU01784	1.5437	0	pseudouridine synthesis (GO:0001522); RNA modification (GO:0009451)	-	pseudouridine synthase activity (GO:0009982); RNA binding (GO:0003723)	tRNA pseudouridine synthase (PF01416)
NCU08824	1.5446	0	-	-	-	Probable molybdopterin binding domain (PF00994)
NCU02053	1.54627	0	DNA repair (GO:0006281)	-	damaged DNA binding (GO:0003684)	BRCT domain, a BRCA1 C-terminus domain (PF16589); Domain of unknown function (DUF4414) (PF14377); impB/mucB/samB family (PF00817); impB/mucB/samB family C-terminal domain (PF11799)
NCU03066	1.54801	0	-	-	GTP binding (GO:0005525)	50S ribosome-binding GTPase (PF01926); GNL3L/Grn1 putative GTPase (PF08701)
NCU10351	1.54819	0	-	-	-	Phosphomethylpyrimidine kinase (PF08543)
NCU10436	1.54896	0	carbohydrate metabolic process (GO:0005975)	-	hydrolase activity, hydrolyzing O-glycosyl compounds (GO:0004553)	Glycosyl hydrolases family 17 (PF00332)
NCU01259	1.55066	0	-	-	-	-
NCU07687	1.55111	0	-	-	-	-
NCU10697	1.55271	0	regulation of transcription, DNA-templated (GO:0006355)	nucleus (GO:0005634)	zinc ion binding (GO:0008270); RNA polymerase II transcription factor activity, sequence-specific DNA binding (GO:0000981)	Fungal Zn(2)-Cys(6) binuclear cluster domain (PF00172)
NCU00147	1.55291	0	oxidation-reduction process (GO:0055114)	-	acireductone dioxygenase [iron(II)-requiring] activity (GO:0010309)	ARD/ARD' family (PF03079)
NCU04984	1.55955	0	-	-	-	-
NCU07393	1.56162	0	-	small-subunit processome (GO:0032040)	-	Nop14-like family (PF04147)
NCU08686	1.56348	0	-	-	-	-
NCU04605	1.56701	0	-	-	-	-
NCU09135	1.56928	0	-	-	-	Phosphatidylinositol-specific phospholipase C, X domain (PF00388)
NCU09226	1.56937	0	-	-	-	WLM domain (PF08325)
NCU07620	1.57028	0	transmembrane transport (GO:0055085)	integral component of membrane (GO:0016021)	-	Major Facilitator Superfamily (PF07690)
NCU04558	1.57264	0	-	-	-	-
NCU09870	1.57728	0	-	-	-	BUD22 (PF09073)
NCU08775	1.57766	0	-	-	-	-
NCU10392	1.57901	0	-	-	-	Heterokaryon incompatibility protein (HET) (PF06985)
NCU01638	1.58058	0	transcription, DNA-templated (GO:0006351)	-	DNA binding (GO:0003677); DNA-directed 5'-3' RNA polymerase activity (GO:0003899)	RNA polymerase Rpb1, domain 3 (PF04983); RNA polymerase Rpb1, domain 5 (PF04998); RNA polymerase Rpb1, domain 4 (PF05000); RNA polymerase Rpb1, domain 1 (PF04997); RNA polymerase Rpb1, domain 2 (PF00623)
NCU02284	1.58148	0	-	-	N-acetyltransferase activity (GO:0008080)	GNAT acetyltransferase 2 (PF13718); Helicase (PF05127); Possible tRNA binding domain (PF13725); Domain of unknown function (DUF1726) (PF08351)
NCU11283	1.58794	0	-	-	protein binding (GO:0005515)	WD domain, G-beta repeat (PF00400)
NCU04571	1.58818	0	-	-	-	Ribosomal RNA-processing protein 7 (RRP7) (PF12923)
NCU03369	1.58865	0	-	-	-	Pirin (PF02678); Pirin C-terminal cupin domain (PF05726)
NCU06112	1.5909	0	carboxylic acid metabolic process (GO:0019752)	-	carboxy-lyase activity (GO:0016831); pyridoxal phosphate binding (GO:0030170)	Pyridoxal-dependent decarboxylase conserved domain (PF00282)
NCU05392	1.59162	0	methylation (GO:0032259)	-	methyltransferase activity (GO:0008168)	Cupin-like domain (PF13621); Leucine carboxyl methyltransferase (PF04072)
NCU06978	1.59211	0	-	-	holo-[acyl-carrier-protein] synthase activity (GO:0008897); magnesium ion binding (GO:0000287)	4'-phosphopantetheinyl transferase superfamily (PF01648)
NCU03817	1.59435	0	-	-	-	Sucrase/ferredoxin-like (PF06999)
NCU07487	1.59622	0	carbohydrate metabolic process (GO:0005975)	-	hydrolase activity, hydrolyzing O-glycosyl compounds (GO:0004553)	Glycosyl hydrolase family 3 N terminal domain (PF00933); Fibronectin type III-like domain (PF14310); PA14 domain (PF07691); Glycosyl hydrolase family 3 C-terminal domain (PF01915)
NCU06059	1.59806	0	-	-	sequence-specific DNA binding (GO:0043565)	Translin family (PF01997)
NCU04207	1.59829	0	transmembrane transport (GO:0055085)	membrane (GO:0016020)	-	Mechanosensitive ion channel (PF00924)
NCU00837	1.59976	0	oxidation-reduction process (GO:0055114); pentose-phosphate shunt (GO:0006098)	-	phosphogluconate dehydrogenase (decarboxylating) activity (GO:0004616)	6-phosphogluconate dehydrogenase, C-terminal domain (PF00393); NAD binding domain of 6-phosphogluconate dehydrogenase (PF03446)
NCU09545	1.60019	0	oxidation-reduction process (GO:0055114); methionine metabolic process (GO:0006555)	-	methylenetetrahydrofolate reductase (NAD(P)H) activity (GO:0004489)	Methylenetetrahydrofolate reductase (PF02219)
NCU01458	1.60176	0	-	-	-	Alb1 (PF09135)
NCU02521	1.60228	0	-	-	-	-
NCU05923	1.60315	0	oxidation-reduction process (GO:0055114)	-	flavin adenine dinucleotide binding (GO:0050660); oxidoreductase activity, acting on CH-OH group of donors (GO:0016614)	GMC oxidoreductase (PF05199); Cytochrome domain of cellobiose dehydrogenase (PF16010); GMC oxidoreductase (PF00732)
NCU06585	1.60359	0	-	-	DNA binding (GO:0003677)	Rad4 beta-hairpin domain 1 (PF10403); Rad4 beta-hairpin domain 2 (PF10404); Rad4 transglutaminase-like domain (PF03835); Rad4 beta-hairpin domain 3 (PF10405)
NCU09382	1.60461	0	-	-	protein binding (GO:0005515)	Tetratricopeptide repeat (PF13181)
NCU02612	1.60755	0	regulation of transcription, DNA-templated (GO:0006355)	-	DNA-binding transcription factor activity (GO:0003700)	TEA/ATTS domain family (PF01285)
NCU03296	1.60787	0	-	mitochondrion (GO:0005739)	-	ATP11 protein (PF06644)
NCU00244	1.60905	0	-	-	transferase activity, transferring glycosyl groups (GO:0016757)	Glycosyl transferase family 8 (PF01501)
NCU02322	1.61198	0	carbohydrate metabolic process (GO:0005975)	-	zinc ion binding (GO:0008270); mannose-6-phosphate isomerase activity (GO:0004476)	Phosphomannose isomerase type I (PF01238)
NCU06758	1.61303	0	-	-	protein binding (GO:0005515)	WD domain, G-beta repeat (PF00400)
NCU04827	1.61303	0	regulation of transcription, DNA-templated (GO:0006355)	nucleus (GO:0005634)	zinc ion binding (GO:0008270); RNA polymerase II transcription factor activity, sequence-specific DNA binding (GO:0000981)	Fungal Zn(2)-Cys(6) binuclear cluster domain (PF00172)
NCU01758	1.61351	0	-	-	-	Uncharacterized ACR, YdiU/UPF0061 family (PF02696)
NCU05293	1.61486	0	-	nucleolus (GO:0005730)	methyltransferase activity (GO:0008168)	Hypothetical methyltransferase (PF05148)
NCU02035	1.61635	0	base-excision repair (GO:0006284)	-	-	HhH-GPD superfamily base excision DNA repair protein (PF00730)
NCU08100	1.61878	0	-	-	-	-
NCU04154	1.61888	0	-	-	-	GDP/GTP exchange factor Sec2p (PF06428)
NCU07585	1.62218	0	oxidation-reduction process (GO:0055114); porphyrin-containing compound biosynthetic process (GO:0006779); siroheme biosynthetic process (GO:0019354)	-	precorrin-2 dehydrogenase activity (GO:0043115)	Sirohaem biosynthesis protein C-terminal (PF14823); Sirohaem biosynthesis protein central (PF14824); Putative NAD(P)-binding (PF13241)
NCU12091	1.62691	0	-	-	-	-
NCU08626	1.63544	0	-	-	-	DNA photolyase (PF00875); FAD binding domain of DNA photolyase (PF03441)
NCU09153	1.63696	0	-	-	-	-
NCU17257	1.63711	0	transmembrane transport (GO:0055085)	integral component of membrane (GO:0016021)	-	Major Facilitator Superfamily (PF07690)
NCU02834	1.63751	0	-	-	-	STIMATE family (PF12400)
NCU03397	1.6409	0	-	-	-	-
NCU07551	1.64339	0	rRNA processing (GO:0006364)	-	snoRNA binding (GO:0030515)	U3 snoRNA associated (PF08297)
NCU09535	1.64388	0	oxidation-reduction process (GO:0055114)	-	oxidoreductase activity (GO:0016491)	FAD dependent oxidoreductase (PF01266)
NCU06409	1.6525	0	-	-	-	KRI1-like family (PF05178); KRI1-like family C-terminal (PF12936)
NCU09631	1.65328	0	-	-	-	PhoD-like phosphatase, N-terminal domain (PF16655); PhoD-like phosphatase (PF09423)
NCU02536	1.65585	0	-	-	FAD binding (GO:0071949)	FAD binding domain (PF01494)
NCU04538	1.66419	0	-	-	-	-
NCU05842	1.66602	0	-	-	-	Methyltransferase domain (PF13489)
NCU00360	1.66657	0	-	-	coenzyme binding (GO:0050662); catalytic activity (GO:0003824)	NAD dependent epimerase/dehydratase family (PF01370)
NCU03092	1.66744	0	-	-	nucleic acid binding (GO:0003676)	RNA recognition motif. (a.k.a. RRM, RBD, or RNP domain) (PF00076)
NCU02120	1.66759	0	-	-	-	-
NCU01926	1.66936	0	-	-	protein binding (GO:0005515)	F-box-like (PF12937)
NCU05844	1.66997	0	-	-	-	-
NCU16386	1.67442	0	-	-	-	-
NCU00038	1.6747	0	-	-	-	Zinc finger, C2H2 type (PF00096)
NCU16999	1.67634	0	oxidation-reduction process (GO:0055114)	-	oxidoreductase activity (GO:0016491)	Ferric reductase NAD binding domain (PF08030)
NCU17113	1.67636	0	-	-	-	-
NCU06526	1.6772	0	oxidation-reduction process (GO:0055114)	-	heme binding (GO:0020037); iron ion binding (GO:0005506); oxidoreductase activity, acting on paired donors, with incorporation or reduction of molecular oxygen (GO:0016705)	Cytochrome P450 (PF00067)
NCU06662	1.67873	0	-	-	-	Mitochondrial carrier protein (PF00153)
NCU08121	1.67988	0	ribosome biogenesis (GO:0042254)	nucleus (GO:0005634)	-	Ribosome biogenesis regulatory protein (RRS1) (PF04939)
NCU04231	1.68068	0	oxidation-reduction process (GO:0055114)	-	oxidoreductase activity, acting on the CH-CH group of donors (GO:0016627)	Acyl-CoA dehydrogenase, C-terminal domain (PF00441)
NCU09407	1.68139	0	lipid metabolic process (GO:0006629)	-	triglyceride lipase activity (GO:0004806)	Patatin-like phospholipase (PF01734); Domain of unknown function (DUF3336) (PF11815)
NCU02310	1.68251	0	-	-	-	AAA ATPase domain (PF13191)
NCU03669	1.68634	0	rRNA processing (GO:0006364); methylation (GO:0032259)	nucleus (GO:0005634)	methyltransferase activity (GO:0008168)	FtsJ-like methyltransferase (PF01728); Domain of unknown function (DUF3381) (PF11861); Spb1 C-terminal domain (PF07780)
NCU07731	1.68645	0	-	-	-	SAP domain (PF02037)
NCU02169	1.68707	0	-	-	-	U3-containing 90S pre-ribosomal complex subunit (PF14617)
NCU02675	1.6879	0	-	-	-	RNA 3'-terminal phosphate cyclase (PF01137); RNA 3'-terminal phosphate cyclase (RTC), insert domain (PF05189)
NCU16678	1.69176	0	-	-	-	-
NCU04765	1.69331	0	-	-	-	-
NCU02002	1.70638	0	-	mitochondrial inner membrane (GO:0005743)	-	Mitochondrial inner-membrane-bound regulator (PF14611)
NCU01132	1.7075	0	transmembrane transport (GO:0055085)	integral component of membrane (GO:0016021)	transmembrane transporter activity (GO:0022857)	Sugar (and other) transporter (PF00083)
NCU04728	1.70761	0	carbohydrate metabolic process (GO:0005975)	-	phosphotransferase activity, alcohol group as acceptor (GO:0016773); ATP binding (GO:0005524)	Hexokinase (PF00349); Hexokinase (PF03727)
NCU16328	1.70808	0	-	-	-	Sas10/Utp3/C1D family (PF04000)
NCU08564	1.71028	0	-	-	-	-
NCU05782	1.71046	0	-	-	ATP binding (GO:0005524); nucleic acid binding (GO:0003676)	Helicase conserved C-terminal domain (PF00271); DEAD/DEAH box helicase (PF00270)
NCU11175	1.71324	0	-	-	ATP binding (GO:0005524); nucleic acid binding (GO:0003676)	Helicase conserved C-terminal domain (PF00271); DEAD/DEAH box helicase (PF00270)
NCU09488	1.71647	0	-	-	-	NUC130/3NT domain (PF08158); SDA1 (PF05285)
NCU03462	1.71776	0	-	-	-	-
NCU03750	1.72207	0	-	-	-	-
NCU00481	1.72507	0	-	-	-	Peptidase M16 inactive domain (PF05193); Middle or third domain of peptidase_M16 (PF16187); Insulinase (Peptidase family M16) (PF00675)
NCU09738	1.72507	0	oxidation-reduction process (GO:0055114)	-	oxidoreductase activity (GO:0016491)	Taurine catabolism dioxygenase TauD, TfdA family (PF02668)
NCU08056	1.72544	0	transport (GO:0006810)	integral component of membrane (GO:0016021); membrane (GO:0016020)	ATPase activity, coupled to transmembrane movement of substances (GO:0042626); ATPase activity (GO:0016887); ATP binding (GO:0005524)	ABC-transporter extracellular N-terminal (PF14510); ABC transporter (PF00005); ABC-2 type transporter (PF01061); CDR ABC transporter (PF06422)
NCU04539	1.72993	0	-	-	oxidoreductase activity (GO:0016491)	FMN-dependent dehydrogenase (PF01070)
NCU11321	1.73044	0	-	-	-	Ribosomal protein L1p/L10e family (PF00687)
[truncated: 929 more rows]
